# Supplementary material
Source: Elsevier journal article supplement (https://comptes-rendus.academie-sciences.fr/biologies/article/10.1016/j.crvi.2016.05.011/file/attach/mmc1.pdf)
Supplement: mmc1 [file mmc1.pdf]

## Regulation of disease resistance NBS gene family by microRNAs in Poaceae

Yosra Habachi-Houimli1, Yosra Khalfallah1, Hanem Makni1,2, Mohamed Makni1 and Dhia Bouktila1,2

1 Université de Tunis El Manar, Faculté des Sciences de Tunis, Unité de Recherche Génomique des Insectes Ravageurs des Cultures d'intérêt agronomique (UR11ES10), 2092 El Manar, Tunis, Tunisia.

2 Université de Tunis, Institut Supérieur de l'Animation pour la Jeunesse et la Culture (ISAJC), 2055 Bir El Bey, Tunisia.

3 Université de Jendouba, Institut Supérieur de Biotechnologie de Béja (ISBB), 9000 Béja, Tunisia.

Correspondance: Dhia BOUKTILA, Unité de Recherche Génomique des Insectes Ravageurs des Cultures d'intérêt agronomique (UR11ES10), Faculté des Sciences de Tunis, 2092, Tunis, Tunisia. Email: [dhia\\_bouktila2000@yahoo.fr](mailto:dhia_bouktila2000@yahoo.fr). Tel: (+216)22569664.

### Table footnote

- miRNA order n°: miRNAs whose numbers are followed by an asterisk are members of the MIR2118 family.
- miRNA accession: miRBase (<http://www.mirbase.org/ftp.shtml>)
- *S. bicolor*: <http://www.phytozome.net/sorghum.php>
- *O. sativa*: RGAP 7.0, <http://rice.plantbiology.msu.edu/>
- *B. distachyon*: MIPS, <ftp://ftp.mips.helmholtz-muenchen.de/plants/brachypodium/genes/v1.2/>
- *Triticum aestivum* : Bouktila D, Khalfallah Y, Habachi-Houimli Y, Mezghani-Khemakhem M, Makni M, Makni H (2015) Full genome identification and characterization of NBS-encoding disease resistance genes in wheat. Mol Genet Genomics 290:257–271.
- *Hordeum vulgare*: Habachi-Houimli Y, Khalfallah Y, Mezghani-Khemakhem M, Makni H, Makni M, unpublished data

**Table S1: Poaceae microRNAs and their candidate targets among 1,070 NBS-encoding genes, based on sequence complementarity, using the psRNA Target program (Dai and Zhao 2011)**

| miRNA order n° | miRNA accession | Target accession  | Expect ation | miRNA start | miRNA end | Target start | Target end | miRNA aligned fragment | Target aligned fragment | Inhibition  |
|----------------|-----------------|-------------------|--------------|-------------|-----------|--------------|------------|------------------------|-------------------------|-------------|
| 1              | hvu1120         | Bradi2g60250.1    | 2.0          | 1           | 19        | 10           | 29         | ACAUUCUU-AUAUUUUGGGA   | UCCCAUAAUUGAAGAAUGU     | Translation |
|                | hvu5048a/b      | CAJX010008743.1-1 | 3.0          | 1           | 22        | 274          | 295        | UAUUUGCAGGUUUUAGGUCUAA | UUAGAUCUCAAGCCCGCAAUA   | Cleavage    |
| 2              | hvu5048a/b      | CALP010004868.1-1 | 3.0          | 1           | 21        | 1441         | 1461       | UAUUUGCAGGUUUUAGGUCUA  | UGGACCUUAAACCGGCAAUG    | Cleavage    |
|                | hvu5048a/b      | CALP010035124.1-1 | 3.0          | 1           | 20        | 620          | 639        | UAUUUGCAGGUUUUAGGUCU   | AGAUCUAUAGUCUGCAAGUA    | Cleavage    |
|                | hvu5048a/b      | CAJX010852043.1-1 | 3.0          | 1           | 20        | 1835         | 1854       | UAUUUGCAGGUUUUAGGUCU   | AGCUCUAUACUUGCAAUA      | Cleavage    |
|                | hvu5049c        | CAJX010167231.1-1 | 2.0          | 1           | 23        | 699          | 721        | AGACAAUUUUUUGGGACGGAGG | CCUCUGUCCAAAUAACUGUCU   | Cleavage    |
| 3              | hvu5049c        | CALP010201716.1-1 | 1.5          | 1           | 23        | 895          | 917        | AGACAAUUUUUUGGGACGGAGG | CCUCCGUCCAAAUAAGUUGUCU  | Translation |
|                | hvu5049c        | CALP010004868.1-1 | 3.0          | 1           | 21        | 665          | 685        | AGACAAUUUUUUGGGACGGGA  | UCCGUCCAAAUAAGUGGCU     | Cleavage    |
| 4              | hvu6191         | CALP010029177.1-1 | 1.5          | 1           | 20        | 898          | 917        | UAGAUUUGUCUAGAUUAGAA   | UCCAUAUCUAGAUAAUUCUA    | Cleavage    |
|                | hvu6191         | 1979031           | 3.0          | 1           | 20        | 3123         | 3142       | UAGAUUUGUCUAGAUUAGAA   | UUCAUGUCUUAGUAAUUUG     | Translation |
| 5              | hvu6197         | CALP010075277.1-1 | 2.0          | 1           | 21        | 307          | 327        | UCUGUCCUAAAUGUAAGACG   | CAUCUACAUUUAGGAUAGG     | Cleavage    |
|                | hvu6197         | CALP010075277.1-1 | 3.0          | 1           | 21        | 245          | 265        | UCUGUCCUAAAUGUAAGACG   | CGUCUCAUUUAGGAACCGA     | Cleavage    |
| 6              | hvu6197         | CALP010000973.1-1 | 1.5          | 1           | 20        | 3693         | 3712       | UCUGUCCUAAAUGUAAGAC    | GACUACAUUUAGGAACCGA     | Cleavage    |
|                | hvu6198         | CALP010574608.1-1 | 2.5          | 1           | 20        | 595          | 614        | GCUCUGUCUUGGAUGGUCAU   | GUGGUCAUCCAGGGCAGAGC    | Cleavage    |
| 7              | hvu6205         | CAJX010063404.1-1 | 3.0          | 1           | 23        | 1695         | 1717       | AGGAUUUUGGAUACGUUUUAGU | GCUGAAGCAUACCUACAUCU    | Translation |
| 8              | hvu6210         | LOC_Os09g14490.1  | 2.5          | 1           | 20        | 3632         | 3651       | ACUCCUUGGUUAUCAACUUC   | GAAUUUGGGAACCAAGGAGU    | Cleavage    |
| 9              | hvu6214         | CALP010116734.1-1 | 2.5          | 1           | 20        | 793          | 811        | CGACGACGACGAGCACGACA   | UGUC-UGCUUGUCGUCGUCG    | Cleavage    |

|     |               |                   |     |   |    |      |      |                       |                         |             |
|-----|---------------|-------------------|-----|---|----|------|------|-----------------------|-------------------------|-------------|
| 10  | bdi156h3p     | 1956397           | 3.0 | 1 | 20 | 1790 | 1809 | GCUCACUGCUCUUCCUGUCA  | UGCAAGGAAAAGCAGUGAGC    | Translation |
| 11  | bdi159b3p.3   | LOC_Os08g42670.1  | 2.5 | 1 | 20 | 1192 | 1211 | UUUGCAUGACCGGAGGAGCCG | CAGCUCAUCGGUCGUGCAAA    | Cleavage    |
| 12  | bdi159b5p.1   | 1971306           | 2.5 | 1 | 20 | 892  | 911  | GAGCUCCAUCAUUCCAAUG   | CAAUGCAAUGAUGGGAGCUC    | Cleavage    |
|     | bdi159b5p.3   | LOC_Os01g35254.1  | 3.0 | 1 | 20 | 3391 | 3410 | AGCUGCUUGUUCAUGGUUCC  | AGGACUAUGAACAAGCAGCG    | Cleavage    |
| 13  | bdi159b5p.3   | LOC_Os08g43000.1  | 3.0 | 1 | 20 | 340  | 359  | AGCUGCUUGUUCAUGGUUCC  | GUAACCAUGAGCAAGAAGCGU   | Cleavage    |
|     | bdi159b5p.3   | LOC_Os05g15040.1  | 3.0 | 1 | 21 | 3088 | 3108 | AGCUGCUUGUUCAUGGUUCCC | GGCAACCCUGAAGAAGCAGCU   | Translation |
| 14  | bdi166h5p     | CALP010239775.1-1 | 3.0 | 1 | 21 | 266  | 286  | GGUUUGUUGUCUGGCUCGGGG | CCCUGAGCCUGAAAACAAGCC   | Translation |
| 15  | bdi167a/b/f   | CALP010007316.1-1 | 2.0 | 1 | 21 | 268  | 288  | UGAAGCUGCCAGCAUGAUCUA | UCGAUCAUGUUGGCAGCUUCG   | Cleavage    |
|     | bdi167a/b/f   | LOC_Os07g29820.1  | 2.5 | 1 | 21 | 2609 | 2629 | UGAAGCUGCCAGCAUGAUCUA | UAGAUCAUGCUGACAGCCUCA   | Translation |
| 16  | bdi167c/d/e5p | CALP010007316.1-1 | 2.0 | 1 | 20 | 269  | 288  | UGAAGCUGCCAGCAUGAUCU  | CGAUCAUGUUGGCAGCUUCG    | Cleavage    |
|     | bdi167c/d/e5p | LOC_Os07g29820.1  | 2.5 | 1 | 21 | 2609 | 2629 | UGAAGCUGCCAGCAUGAUCUG | UAGAUCAUGCUGACAGCCUCA   | Translation |
| 17  | bdi167g       | CALP010007316.1-1 | 2.0 | 1 | 20 | 269  | 288  | UGAAGCUGCCAGCAUGAUCU  | CGAUCAUGUUGGCAGCUUCG    | Cleavage    |
|     | bdi167g       | LOC_Os07g29820.1  | 2.5 | 1 | 21 | 2609 | 2629 | UGAAGCUGCCAGCAUGAUCUG | UAGAUCAUGCUGACAGCCUCA   | Translation |
| 18  | bdi169a3p     | LOC_Os06g06380.1  | 3.0 | 1 | 20 | 2152 | 2171 | GGCGAGUUGUUCUUGGCUAC  | GUAGUCAAGGAUAAAUCGCC    | Cleavage    |
| 19  | bdi172b       | CALP010014150.1-1 | 3.0 | 1 | 21 | 576  | 596  | GGAUCUUGAUGAUGCUGCAU  | AGGCAGCAUCAUGGAGGUUCC   | Translation |
|     | bdi2118a      | Bradi2g03260.1    | 2.0 | 1 | 21 | 573  | 593  | UUUCCGAUGCCUCCAUUCCU  | AGGAAUGGGAGGCAUUGGCAA   | Cleavage    |
|     | bdi2118a      | CAJX010010925.1-2 | 2.0 | 1 | 21 | 585  | 605  | UUUCCGAUGCCUCCAUUCCU  | AGGAAUGGGAGGCAUUGGUAA   | Cleavage    |
|     | bdi2118a      | CAJX010010925.1-1 | 2.0 | 1 | 21 | 873  | 893  | UUUCCGAUGCCUCCAUUCCU  | AGGGAUGGGAGGCAUCGGUAA   | Cleavage    |
|     | bdi2118a      | LOC_Os03g50150.1  | 2.0 | 1 | 22 | 572  | 593  | UUUCCGAUGCCUCCAUUCCUA | UGGGGAUGGGAGGGGUCGGAAA  | Translation |
|     | bdi2118a      | LOC_Os01g05600.1  | 2.0 | 1 | 21 | 585  | 605  | UUUCCGAUGCCUCCAUUCCU  | GGGGAUGGGAGGCAUCGGUAA   | Cleavage    |
|     | bdi2118a      | LOC_Os01g05620.1  | 2.0 | 1 | 21 | 588  | 608  | UUUCCGAUGCCUCCAUUCCU  | GGGGAUGGGAGGCAUCGGUAA   | Cleavage    |
|     | bdi2118a      | LOC_Os08g42700.1  | 2.0 | 1 | 21 | 1377 | 1397 | UUUCCGAUGCCUCCAUUCCU  | GGGAAUGGGUGGCAUUGGGAA   | Cleavage    |
|     | bdi2118a      | Bradi2g38827.1    | 2.0 | 1 | 21 | 1137 | 1157 | UUUCCGAUGCCUCCAUUCCU  | GGGAAUGGGAGGUCUUGGAAA   | Cleavage    |
|     | bdi2118a      | LOC_Os01g20720.1  | 3.0 | 1 | 22 | 638  | 659  | UUUCCGAUGCCUCCAUUCCUA | UGGCAUUGGGAGGCAUGGGGAA  | Cleavage    |
|     | bdi2118a      | CAJX010196303.1-2 | 2.0 | 1 | 21 | 1269 | 1289 | UUUCCGAUGCCUCCAUUCCU  | GGGAAUGGGUGGUUUGGAAA    | Cleavage    |
|     | bdi2118a      | 1969361           | 2.5 | 1 | 22 | 605  | 626  | UUUCCGAUGCCUCCAUUCCUA | UGGGAGUUGGAGGGAUUCGGAAA | Translation |
|     | bdi2118a      | Bradi4g14697.1    | 3.0 | 1 | 22 | 536  | 557  | UUUCCGAUGCCUCCAUUCCUA | UGGGCAUGGGAGGUGUUGGGAA  | Cleavage    |
|     | bdi2118a      | 1973916           | 3.0 | 1 | 22 | 314  | 335  | UUUCCGAUGCCUCCAUUCCUA | UAGGCAUGGGAGGGAUUGGGAA  | Translation |
|     | bdi2118a      | 1979851           | 2.5 | 1 | 22 | 614  | 635  | UUUCCGAUGCCUCCAUUCCUA | UGGGAAUUGGAGGAAUCGGGAA  | Translation |
|     | bdi2118a      | LOC_Os01g36640.1  | 3.0 | 1 | 21 | 582  | 602  | UUUCCGAUGCCUCCAUUCCU  | GGGGAUGGGAGGUGUGGGAAA   | Cleavage    |
|     | bdi2118a      | CALP010631233.1-1 | 2.0 | 1 | 22 | 206  | 227  | UUUCCGAUGCCUCCAUUCCUA | UUGGCAUGGGAGGUGUCGGAAA  | Cleavage    |
|     | bdi2118a      | CAJX010349106.1-2 | 2.5 | 1 | 22 | 1001 | 1022 | UUUCCGAUGCCUCCAUUCCUA | UUGGACUGGGGGGUUUGGAAA   | Cleavage    |
|     | bdi2118a      | CAJX010871709.1-1 | 2.5 | 1 | 21 | 1482 | 1502 | UUUCCGAUGCCUCCAUUCCU  | GGGAAUGGGGGGUCUUGGAAA   | Cleavage    |
|     | bdi2118a      | LOC_Os04g30690.1  | 2.5 | 1 | 22 | 749  | 770  | UUUCCGAUGCCUCCAUUCCUA | UUGGCAUGGGGGGCGUCGGGAA  | Cleavage    |
|     | bdi2118a      | CALP010039172.1-1 | 2.0 | 1 | 21 | 596  | 616  | UUUCCGAUGCCUCCAUUCCU  | GGGUAUGGGUGGCAUCGGAAA   | Cleavage    |
|     | bdi2118a      | LOC_Os04g30610.1  | 2.5 | 1 | 22 | 497  | 518  | UUUCCGAUGCCUCCAUUCCUA | UUGGCAUGGGAGGUGUCGGGAA  | Cleavage    |
|     | bdi2118a      | Bradi2g38810.1    | 3.0 | 1 | 21 | 1452 | 1472 | UUUCCGAUGCCUCCAUUCCU  | GGGAAUGGGGGGUCUUGGAAA   | Cleavage    |
| 20* | bdi2118a      | LOC_Os08g42670.1  | 2.5 | 1 | 21 | 1281 | 1301 | UUUCCGAUGCCUCCAUUCCU  | GGGAAUGGGUGCCUUGGAAA    | Cleavage    |
|     | bdi2118a      | Bradi2g38800.1    | 3.0 | 1 | 21 | 1458 | 1478 | UUUCCGAUGCCUCCAUUCCU  | GGGAAUGGGGGGUCUUGGAAA   | Cleavage    |
|     | bdi2118a      | CALP010009046.1-1 | 2.5 | 1 | 20 | 1455 | 1474 | UUUCCGAUGCCUCCAUUCC   | GGAAUGGGAGGUCUUGGGAA    | Cleavage    |
|     | bdi2118a      | CAJX010058741.1-1 | 3.0 | 1 | 22 | 614  | 635  | UUUCCGAUGCCUCCAUUCCUA | UUGGAAUUGGGAGCCUUGGCAA  | Cleavage    |
|     | bdi2118a      | LOC_Os02g18080.1  | 3.0 | 1 | 22 | 683  | 704  | UUUCCGAUGCCUCCAUUCCUA | UUGGAAUUGGGGGUGUUGGAAA  | Cleavage    |
|     | bdi2118a      | LOC_Os02g18000.1  | 3.0 | 1 | 22 | 686  | 707  | UUUCCGAUGCCUCCAUUCCUA | UUGGAAUUGGGGGUGUUGGAAA  | Cleavage    |
|     | bdi2118a      | LOC_Os04g30660.1  | 2.5 | 1 | 22 | 749  | 770  | UUUCCGAUGCCUCCAUUCCUA | UUGGUAUGGGCGGCAUCGGGAA  | Cleavage    |
|     | bdi2118a      | LOC_Os02g18070.1  | 3.0 | 1 | 22 | 692  | 713  | UUUCCGAUGCCUCCAUUCCUA | UUGGAAUUGGGGGUGUUGGAAA  | Cleavage    |
|     | bdi2118a      | 1955404           | 3.0 | 1 | 22 | 617  | 638  | UUUCCGAUGCCUCCAUUCCUA | UUGGAAUUGGGGGUGUUGGAAA  | Cleavage    |
|     | bdi2118a      | LOC_Os09g11020.1  | 3.0 | 1 | 20 | 1006 | 1025 | UUUCCGAUGCCUCCAUUCC   | GGAAUGGGAGGGAUUGGUAA    | Translation |

|     |                      |                   |     |   |    |      |      |                       |                        |             |
|-----|----------------------|-------------------|-----|---|----|------|------|-----------------------|------------------------|-------------|
|     | bdi2118a             | CAJX010060870.1-1 | 3.0 | 1 | 22 | 551  | 572  | UUUCCGAUGCCUCCAUUCCUA | UUGGAGUUGGAGGCAUGGGAAA | Cleavage    |
|     | bdi2118a             | LOC_Os02g18140.1  | 3.0 | 1 | 20 | 718  | 737  | UUUCCGAUGCCUCCAUUCC   | GGAAUUGGGGUGUUGGAAA    | Cleavage    |
|     | bdi2118a             | LOC_Os01g33810.1  | 2.5 | 1 | 20 | 337  | 356  | UUUCCGAUGCCUCCAUUCC   | GGAAUGGGAGGGCUUGGAAA   | Translation |
|     | bdi2118a             | CAJX010009739.1-1 | 3.0 | 1 | 20 | 667  | 686  | UUUCCGAUGCCUCCAUUCC   | GGAAUUGGAGGUUAGGAAA    | Cleavage    |
|     | bdi2118a             | Bradi2g39517.1    | 3.0 | 1 | 21 | 1278 | 1298 | UUUCCGAUGCCUCCAUUCCU  | GGGAAUGGGUGGUCUUGGAAA  | Cleavage    |
|     | bdi2118a             | CALP010125674.1-1 | 3.0 | 1 | 22 | 612  | 633  | UUUCCGAUGCCUCCAUUCCUA | UCGGAAUGGGUGGUGUUGGGAA | Cleavage    |
|     | bdi2118a             | 1970749           | 3.0 | 1 | 21 | 1299 | 1319 | UUUCCGAUGCCUCCAUUCCU  | GGGAAUGGGUGGCUUGGAAA   | Cleavage    |
|     | bdi2118a             | CAJX010853954.1-1 | 3.0 | 1 | 21 | 1311 | 1331 | UUUCCGAUGCCUCCAUUCCU  | GGGAAUGGGUGGUCUUGGAAA  | Cleavage    |
|     | bdi2118a             | CAJX010850960.1-1 | 2.5 | 1 | 21 | 111  | 131  | UUUCCGAUGCCUCCAUUCCU  | GGGCAUGGGUGGCUUGGAAA   | Cleavage    |
|     | bdi2118a             | CAJX010086000.1-1 | 3.0 | 1 | 22 | 485  | 506  | UUUCCGAUGCCUCCAUUCCUA | UUGGAAUGGGAGGCUUGGUAA  | Cleavage    |
|     | bdi2118a             | CAJX010075181.1-1 | 3.0 | 1 | 21 | 597  | 617  | UUUCCGAUGCCUCCAUUCCU  | GGGUUUGGGUGGUUUCGGGAA  | Cleavage    |
|     | bdi2118a             | CAJX010864692.1-1 | 3.0 | 1 | 21 | 597  | 617  | UUUCCGAUGCCUCCAUUCCU  | GGGUUUGGGUGGUUUCGGGAA  | Cleavage    |
|     | bdi2118a             | CALP010300106.1-1 | 3.0 | 1 | 21 | 249  | 269  | UUUCCGAUGCCUCCAUUCCU  | GGGCUUGGGAGGCAUUGGAAG  | Cleavage    |
|     | bdi2118a             | Bradi4g04657.1    | 3.0 | 1 | 22 | 548  | 569  | UUUCCGAUGCCUCCAUUCCUA | UUGGAUUUGGAGGCCUCGGAAA | Cleavage    |
|     | bdi2118b             | Bradi2g03260.1    | 2.5 | 1 | 21 | 573  | 593  | UUCCUGAUGCCUCCAUUCCU  | AGGAAUGGGAGGCAUUGGCAA  | Cleavage    |
|     | bdi2118b             | CAJX010010925.1-2 | 2.5 | 1 | 21 | 585  | 605  | UUCCUGAUGCCUCCAUUCCU  | AGGAAUGGGAGGCAUUGGUAA  | Cleavage    |
|     | bdi2118b             | CAJX010010925.1-1 | 2.5 | 1 | 21 | 873  | 893  | UUCCUGAUGCCUCCAUUCCU  | AGGGAAUGGGAGGCAUCGGUAA | Cleavage    |
|     | bdi2118b             | LOC_Os08g42700.1  | 2.0 | 1 | 21 | 1377 | 1397 | UUCCUGAUGCCUCCAUUCCU  | GGGAAUGGGUGGCAUUGGGAA  | Cleavage    |
|     | bdi2118b             | LOC_Os01g05600.1  | 2.5 | 1 | 21 | 585  | 605  | UUCCUGAUGCCUCCAUUCCU  | GGGGAUGGGAGGCAUCGGUAA  | Cleavage    |
|     | bdi2118b             | LOC_Os01g05620.1  | 2.5 | 1 | 21 | 588  | 608  | UUCCUGAUGCCUCCAUUCCU  | GGGGAUGGGAGGCAUCGGUAA  | Cleavage    |
|     | bdi2118b             | LOC_Os01g20720.1  | 3.0 | 1 | 22 | 638  | 659  | UUCCUGAUGCCUCCAUUCCUA | UGGCAAUGGGAGGCAUGGGGAA | Cleavage    |
|     | bdi2118b             | Bradi4g14697.1    | 3.0 | 1 | 22 | 536  | 557  | UUCCUGAUGCCUCCAUUCCUA | UGGGCAUGGGAGGUGUUGGGAA | Cleavage    |
|     | bdi2118b             | 1973916           | 3.0 | 1 | 22 | 314  | 335  | UUCCUGAUGCCUCCAUUCCUA | UAGGCAUGGGAGGGAUUGGGAA | Translation |
|     | bdi2118b             | 1979851           | 2.5 | 1 | 22 | 614  | 635  | UUCCUGAUGCCUCCAUUCCUA | UGGGAAUUGGAGGAAUCGGGAA | Translation |
| 21* | bdi2118b             | LOC_Os04g30690.1  | 2.5 | 1 | 22 | 749  | 770  | UUCCUGAUGCCUCCAUUCCUA | UUGGCAUGGGGGCGUCGGGAA  | Cleavage    |
|     | bdi2118b             | Bradi2g38810.1    | 3.0 | 1 | 21 | 1452 | 1472 | UUCCUGAUGCCUCCAUUCCU  | GGGAAUGGGGGGUCUUGGGAA  | Cleavage    |
|     | bdi2118b             | LOC_Os04g30610.1  | 2.5 | 1 | 22 | 497  | 518  | UUCCUGAUGCCUCCAUUCCUA | UUGGCAUGGGAGGUGUCGGGAA | Cleavage    |
|     | bdi2118b             | Bradi2g38800.1    | 3.0 | 1 | 21 | 1458 | 1478 | UUCCUGAUGCCUCCAUUCCU  | GGGAAUGGGGGGUCUUGGGAA  | Cleavage    |
|     | bdi2118b             | CALP010009046.1-1 | 2.5 | 1 | 20 | 1455 | 1474 | UUCCUGAUGCCUCCAUUCC   | GGAAUGGGAGGUCUUGGGAA   | Cleavage    |
|     | bdi2118b             | LOC_Os04g30660.1  | 2.5 | 1 | 22 | 749  | 770  | UUCCUGAUGCCUCCAUUCCUA | UUGGUUUGGGCGCAUCGGGAA  | Cleavage    |
|     | bdi2118b             | 1976664           | 3.0 | 1 | 21 | 1245 | 1265 | UUCCUGAUGCCUCCAUUCCU  | GGGAAUGGGUGGCUUGGGAA   | Cleavage    |
|     | bdi2118b             | 1970749           | 3.0 | 1 | 21 | 1299 | 1319 | UUCCUGAUGCCUCCAUUCCU  | GGGAAUGGGUGGCUUGGGAA   | Cleavage    |
|     | bdi2118b             | CALP010125674.1-1 | 3.0 | 1 | 22 | 612  | 633  | UUCCUGAUGCCUCCAUUCCUA | UCGGAAUGGGUGGUGUUGGGAA | Cleavage    |
|     | bdi2118b             | CAJX010075181.1-1 | 3.0 | 1 | 21 | 597  | 617  | UUCCUGAUGCCUCCAUUCCU  | GGGUUUGGGUGGUUUCGGGAA  | Cleavage    |
|     | bdi2118b             | CAJX010864692.1-1 | 3.0 | 1 | 21 | 597  | 617  | UUCCUGAUGCCUCCAUUCCU  | GGGUUUGGGUGGUUUCGGGAA  | Cleavage    |
|     | bdi2118b             | Bradi3g03882.1    | 3.0 | 1 | 19 | 1150 | 1169 | UUCCUGAUGC-CUCCAUUC   | GACUGGGAGGCAUCAGGAA    | Translation |
| 22  | bdi319b5p            | LOC_Os05g30220.1  | 3.0 | 1 | 20 | 1285 | 1304 | AGAGCUCUCUUCAGUCCACU  | AGUGAACCUAAGAGACUCUCU  | Cleavage    |
| 23  | bdi395a/b            | Bradi2g52840.1    | 3.0 | 1 | 20 | 3046 | 3065 | UGAAGUGUUUGGGGGAACUC  | GGUUUACCUCAAACACUUCA   | Cleavage    |
| 24  | bdi395c3p            | Bradi2g52840.1    | 3.0 | 1 | 20 | 3046 | 3065 | UGAAGUGUUUGGGGGAACUC  | GGUUUACCUCAAACACUUCA   | Cleavage    |
| 25  | bdi395e3pf/g/h/j/k/l | Bradi2g52840.1    | 3.0 | 1 | 20 | 3046 | 3065 | UGAAGUGUUUGGGGGAACUC  | GGUUUACCUCAAACACUUCA   | Cleavage    |
| 26  | bdi395e5p            | LOC_Os11g13440.1  | 3.0 | 1 | 20 | 2    | 21   | GUUCUCCUCAAUACUUCA    | UGGAAGGAUUUGGGGAGAAC   | Cleavage    |
| 27  | bdi395m/q/o3p/n3p    | Bradi2g52840.1    | 3.0 | 1 | 20 | 3046 | 3065 | UGAAGUGUUUGGGGGAACUC  | GGUUUACCUCAAACACUUCA   | Cleavage    |
| 28  | bdi395p3p            | CALP010093416.1-1 | 3.0 | 1 | 20 | 434  | 453  | UGAAGUGUUUGGAGGAACUC  | GAGAUUCUCCAAGCAUUUCG   | Cleavage    |
| 29  | bdi396a3p            | CALP010029691.1-1 | 3.0 | 1 | 21 | 527  | 547  | GUUCAAGAAAGUCCUUGGAAA | UUUUUAAGGACUUUCUUGAGU  | Cleavage    |
| 30  | bdi396c5p/d5p        | LOC_Os12g10180.1  | 3.0 | 1 | 20 | 461  | 480  | UUCCACAGCUUUCUUGAACU  | GGUUGAGGGAAGCUGUGGAG   | Cleavage    |
| 31  | bdi396e5p            | LOC_Os12g10180.1  | 3.0 | 1 | 21 | 460  | 480  | UUCCACAGCUUUCUUGAACU  | AGGUUGAGGGAAGCUGUGGAG  | Cleavage    |
| 32  | bdi397a              | CALP010010603.1-1 | 2.5 | 1 | 20 | 687  | 706  | UCAUUGAGUGCAGCGUUGAU  | AUCAUUGUUGAACUCAGUGA   | Translation |

|    |              |                   |     |   |    |      |      |                          |                         |             |
|----|--------------|-------------------|-----|---|----|------|------|--------------------------|-------------------------|-------------|
| 33 | bdi399d      | LOC_Os05g30220.1  | 3.0 | 1 | 21 | 1180 | 1200 | UGCCAAAGGAGAUUUGCCCGG    | CUUGGAAGAUCCUUUGGCA     | Cleavage    |
| 34 | bdi5057      | CAJX010846126.1-1 | 3.0 | 1 | 21 | 2435 | 2455 | AAAUUUCAAUCAUUUUGACA     | UGUCAGAAUGGUUUUGAAGUU   | Cleavage    |
|    | bdi5057      | CALP010005882.1-1 | 3.0 | 1 | 21 | 794  | 814  | AAAUUUCAAUCAUUUUGACA     | UGUCCAAUGACCUGAAAUUU    | Translation |
| 35 | bdi5064      | CALP010005058.1-1 | 3.0 | 1 | 20 | 99   | 118  | CGAAUUUGUCCAUGACAUCA     | GGAUGCCUUGGACAAAUUCG    | Cleavage    |
| 36 | bdi5065      | CALP010004716.1-1 | 1.5 | 1 | 21 | 772  | 792  | UAGGCAAUUCACUUAUACACU    | AGUGUAUAUGUGGAUUGCCUA   | Cleavage    |
|    | bdi5065      | 1977357           | 3.0 | 1 | 21 | 1048 | 1069 | UAGGCAAUUCACUUAUACACU    | GGUGUAUCAGGUAAAUGUCUA   | Cleavage    |
|    | bdi5163a3p   | LOC_Os11g44990.1  | 1.5 | 1 | 21 | 2720 | 2740 | UUAGGUUUUCAGGUUAGGUG     | UACCAAACUUGAAAUACCUAA   | Cleavage    |
|    | bdi5163a3p   | LOC_Os11g45180.1  | 1.5 | 1 | 21 | 2411 | 2431 | UUAGGUUUUCAGGUUAGGUG     | UACCAAACUUGAAAUACCUAA   | Cleavage    |
|    | bdi5163a3p   | LOC_Os11g44960.1  | 1.5 | 1 | 21 | 2414 | 2434 | UUAGGUUUUCAGGUUAGGUG     | UACCAAACUUGAAAUACCUAA   | Cleavage    |
|    | bdi5163a3p   | LOC_Os11g45050.1  | 1.5 | 1 | 21 | 2411 | 2431 | UUAGGUUUUCAGGUUAGGUG     | UACCAAACUUGAAAUACCUAA   | Cleavage    |
|    | bdi5163a3p   | LOC_Os11g44970.1  | 2.0 | 1 | 21 | 2258 | 2278 | UUAGGUUUUCAGGUUAGGUG     | UACCAAACUUGAAAUACCUAA   | Cleavage    |
|    | bdi5163a3p   | Bradi4g10207.1    | 2.0 | 1 | 21 | 1883 | 1903 | UUAGGUUUUCAGGUUAGGUG     | UACCAAACUAAAAUACCUAA    | Translation |
|    | bdi5163a3p   | Bradi4g10017.1    | 2.5 | 1 | 21 | 1997 | 2017 | UUAGGUUUUCAGGUUAGGUG     | UACCAAACUGAAGUAUCUGA    | Cleavage    |
|    | bdi5163a3p   | Bradi4g10220.1    | 2.5 | 1 | 21 | 2306 | 2326 | UUAGGUUUUCAGGUUAGGUG     | UACCAAACUGAAGUAUCUGA    | Cleavage    |
|    | bdi5163a3p   | Bradi4g10030.1    | 2.0 | 1 | 21 | 2402 | 2422 | UUAGGUUUUCAGGUUAGGUG     | UACCAAACUAAAAUACCUAA    | Translation |
| 37 | bdi5163a3p   | LOC_Os11g13940.1  | 3.0 | 1 | 21 | 2624 | 2644 | UUAGGUUUUCAGGUUAGGUG     | UGCCUAACUUGAAGUGUCUGA   | Cleavage    |
|    | bdi5163a3p   | Bradi4g10171.2    | 2.5 | 1 | 21 | 1880 | 1900 | UUAGGUUUUCAGGUUAGGUG     | UACCAAACUAAAAUACCUAA    | Translation |
|    | bdi5163a3p   | Bradi4g10050.1    | 2.5 | 1 | 21 | 2000 | 2020 | UUAGGUUUUCAGGUUAGGUG     | UACCAAACUAAAAUACCUAA    | Translation |
|    | bdi5163a3p   | CAJX010063827.1-1 | 3.0 | 1 | 21 | 2006 | 2026 | UUAGGUUUUCAGGUUAGGUG     | UACUUCACUUGAGGUACCUAA   | Cleavage    |
|    | bdi5163a3p   | Bradi4g10180.2    | 2.5 | 1 | 21 | 2405 | 2425 | UUAGGUUUUCAGGUUAGGUG     | UACCAAACUAAAAUACCUAA    | Translation |
|    | bdi5163a3p   | 1971219           | 3.0 | 1 | 21 | 2408 | 2428 | UUAGGUUUUCAGGUUAGGUG     | UGCCCAACUUGAAAUACCUAA   | Cleavage    |
|    | bdi5163a3p   | Bradi4g10190.1    | 2.5 | 1 | 21 | 2402 | 2422 | UUAGGUUUUCAGGUUAGGUG     | UAUCAAACUAAAAUACCUAA    | Translation |
|    | bdi5163a3p   | CALP010045839.1-1 | 3.0 | 1 | 21 | 1834 | 1854 | UUAGGUUUUCAGGUUAGGUG     | UACAUCACCUGAGAUACCUAG   | Cleavage    |
|    | bdi5163a3p   | Bradi4g10037.1    | 2.5 | 1 | 21 | 5102 | 5122 | UUAGGUUUUCAGGUUAGGUG     | UACCAAACUAAAAUACCUAA    | Translation |
|    | bdi5163a3p   | Bradi4g10060.1    | 3.0 | 1 | 21 | 2408 | 2428 | UUAGGUUUUCAGGUUAGGUG     | UAACCAAACUAAAAUACCUAA   | Translation |
|    | bdi5163b3p   | Bradi4g10171.2    | 2.0 | 1 | 22 | 1734 | 1755 | UAGAUUUUCAGGUUGUGUGGA    | UCCACACAACCUUGAAGAUUCUA | Cleavage    |
|    | bdi5163b3p   | Bradi4g10180.2    | 2.0 | 1 | 22 | 2259 | 2280 | UAGAUUUUCAGGUUGUGUGGA    | UCCACACAACCUUGAAGAUUCUA | Cleavage    |
|    | bdi5163b3p   | Bradi4g10190.1    | 2.0 | 1 | 22 | 2256 | 2277 | UAGAUUUUCAGGUUGUGUGGA    | UCCACACAACCUUGAAGAUUCUA | Cleavage    |
|    | bdi5163b3p   | Bradi4g10207.1    | 3.0 | 1 | 22 | 1737 | 1758 | UAGAUUUUCAGGUUGUGUGGA    | UCCACACAACCUUGAAGAUUCU  | Cleavage    |
|    | bdi5163b3p   | Bradi4g10030.1    | 3.0 | 1 | 22 | 2256 | 2277 | UAGAUUUUCAGGUUGUGUGGA    | UCCACACAACCUUGAAGAUUCU  | Cleavage    |
|    | bdi5163b3p   | LOC_Os11g40780.1  | 1.5 | 1 | 21 | 2488 | 2508 | UAGAUUUUCAGGUUGUGUGG     | UUGCACAACUUGAAAUACCUAA  | Cleavage    |
| 38 | bdi5163b3p   | LOC_Os11g44970.1  | 2.0 | 1 | 21 | 2257 | 2277 | UAGAUUUUCAGGUUGUGUGG     | CUACCAAACUUGAAAUACCUAA  | Cleavage    |
|    | bdi5163b3p   | Bradi4g10017.1    | 2.5 | 1 | 21 | 1996 | 2016 | UAGAUUUUCAGGUUGUGUGG     | CUACCAAACUGAAGUAUCUG    | Cleavage    |
|    | bdi5163b3p   | Bradi4g10220.1    | 2.5 | 1 | 21 | 2305 | 2325 | UAGAUUUUCAGGUUGUGUGG     | CUACCAAACUGAAGUAUCUG    | Cleavage    |
|    | bdi5163b3p   | LOC_Os11g03650.1  | 3.0 | 1 | 22 | 1968 | 1989 | UAGAUUUUCAGGUUGUGUGGA    | UUUACGCCACCUGAGAUUCUG   | Cleavage    |
|    | bdi5163b3p   | Bradi4g10037.1    | 3.0 | 1 | 21 | 1954 | 1974 | UAGAUUUUCAGGUUGUGUGG     | CCAUGCAACCUUGAAGAUUCUA  | Cleavage    |
|    | bdi5163b3p   | 1971219           | 3.0 | 1 | 21 | 2407 | 2427 | UAGAUUUUCAGGUUGUGUGG     | CUGCCCAACUUGAAAUACCUAA  | Cleavage    |
|    | bdi5163b3p   | LOC_Os02g18070.1  | 3.0 | 1 | 21 | 1769 | 1788 | UAGAUUUUCAGGUUGUGUGG     | CCAC-CAAUCUGAAAUUCUAA   | Cleavage    |
|    | bdi5163b3p   | CALP010035817.1-1 | 3.0 | 1 | 21 | 2443 | 2462 | UAGAUUUUCAGGUUGUGUGG     | UCAC-CAAUCUGAGAUUCUAA   | Cleavage    |
| 39 | bdi5167a5p   | CALP010178092.1-1 | 3.0 | 1 | 21 | 138  | 158  | CCACUUUGGUGUCAUUGGUA     | UUCUAAUGACACCCAAAUUGG   | Cleavage    |
| 40 | bdi5169a/b   | CALP010019942.1-1 | 2.0 | 1 | 21 | 1139 | 1159 | UUUGACCAAGUUUGUAGAACA    | UUUUUCUACAAAGUUGGUCAAA  | Translation |
| 41 | bdi5170      | Bradi5g22547.1    | 3.0 | 1 | 20 | 2881 | 2900 | UCAUCAAGUUGAGUACCGU      | AUGGUUACUGAGCUUGGUGA    | Translation |
| 42 | bdi51733p    | CALP010000232.1-1 | 3.0 | 1 | 20 | 112  | 131  | UGCAUCUGUAUAUACGAGAA     | AUCUGGUUAGUACGGAUGCA    | Cleavage    |
| 43 | bdi5174c3p   | CAJX010838887.1-1 | 3.0 | 1 | 24 | 2125 | 2148 | CAUUUUUGCGUGGAACUGAGGGAG | CUCCUCAGUUCAGGCAAAGCUG  | Translation |
| 44 | bdi5174c5p   | LOC_Os08g42700.1  | 3.0 | 1 | 23 | 1981 | 2003 | UCCUCUCCGUUCUAUGAAGAUUGG | CGAAAUUAUCAUGAAUGGAGGGA | Cleavage    |
| 45 | bdi5174e5p.2 | CALP010000973.1-1 | 2.5 | 1 | 20 | 3701 | 3719 | UACUCCUCUGUUCUAAUAAA     | UUUA-GGAACGGAGGGAGUA    | Cleavage    |
| 46 | bdi5179      | CALP010239820.1-1 | 2.5 | 1 | 21 | 864  | 884  | UUUUGCUCAAGACCGCGCAAC    | GUUGCUUGGUCAUGAGCAAAA   | Translation |

|    |              |                   |     |   |    |      |      |                          |                          |             |
|----|--------------|-------------------|-----|---|----|------|------|--------------------------|--------------------------|-------------|
| 47 | bdi5180a/b   | Bradi0023s00220.2 | 3.0 | 1 | 20 | 1586 | 1605 | UAAGUGUCUCAGUUUUGAAC     | GCUCAAAACUAAGAUUUUA      | Translation |
| 48 | bdi5181b     | CALP010029691.1-1 | 3.0 | 1 | 21 | 1644 | 1664 | UCCGAUCCAUAUAAGUGUCG     | UGUCACUUGUUUAUGAUUGGA    | Cleavage    |
| 49 | bdi5185I5p   | Bradi4g02552.1    | 3.0 | 1 | 20 | 1889 | 1908 | UUCUAAGUCAUUCUCUAAAU     | AUUUGGAGAUUGACAUAGAU     | Cleavage    |
|    | bdi5185I5p   | LOC_Os02g18140.1  | 3.0 | 1 | 20 | 134  | 153  | UUCUAAGUCAUUCUCUAAAU     | AGUUGGAGAAUGACUUGGAA     | Translation |
| 50 | bdi5198      | CALP010063285.1-1 | 3.0 | 1 | 20 | 1186 | 1205 | GGGGAAAAGAGAUUGAGGGA     | UCCUCUAUCUCGUUUUCC       | Cleavage    |
| 51 | bdi5200a5p   | CALP010009414.1-1 | 3.0 | 1 | 20 | 1948 | 1968 | GCCUUAGGGAUAUCU-ACAC     | GUGAGAUUUUCUUAAGGU       | Cleavage    |
| 52 | bdi5200b5p   | CALP010009414.1-1 | 3.0 | 1 | 20 | 1948 | 1968 | GCCUUAGGGAUAUCU-ACAC     | GUGAGAUUUUCUUAAGGU       | Cleavage    |
| 53 | bdi52013p    | CAJX010847349.1-1 | 3.0 | 1 | 20 | 2111 | 2130 | AGGGCGAGGCAAUAUCA        | UUGAGCAUUUGUCUCGCCUC     | Cleavage    |
| 54 | bdi5285p     | CALP010152219.1-1 | 3.0 | 1 | 21 | 694  | 714  | UGGAAGGGGCAUGCAGAGGAG    | CUCUUCAGCAUGCUCUUUCUA    | Cleavage    |
|    | bdi5285p     | CALP010002861.1-1 | 3.0 | 1 | 20 | 1254 | 1273 | UGGAAGGGGCAUGCAGAGGA     | UUCUUUGCAUAUCCUUCCA      | Translation |
| 55 | bdi7708a5p   | CAJX010286327.1-1 | 3.0 | 1 | 20 | 891  | 910  | GUUUUUCCUCAGUACCGUUA     | UGAUGGUACUGAGAGAAAAC     | Cleavage    |
| 56 | bdi77113p.1  | LOC_Os08g43000.1  | 2.5 | 1 | 24 | 2040 | 2063 | AGAUUGUUAAAGAGGCCAAGUAAU | AAACUUUGGUCUUUUGAACAAUCU | Translation |
| 57 | bdi7717a3p   | LOC_Os09g20020.1  | 3.0 | 1 | 20 | 2433 | 2452 | GAUGGAUACGAUUGUCGACU     | AGUAGGCAAUCUUAUCUAUC     | Translation |
|    | bdi7717a5p   | LOC_Os12g17090.1  | 3.0 | 1 | 20 | 2134 | 2153 | UCAUUGAGAUUCGUGUAAAU     | UUUUACAUGACUCUGAUGA      | Translation |
| 58 | bdi77185p    | LOC_Os04g39460.1  | 2.5 | 1 | 20 | 1469 | 1488 | UCAUUUAUUCGUCCAUGGCG     | CGCCACGGGCGGAUAAAUGG     | Cleavage    |
| 59 | bdi77203p    | LOC_Os08g05800.1  | 3.0 | 1 | 22 | 2075 | 2096 | UUUUACACAUGAUUUGGGUUGG   | CAAACCUAAAUCUUGUGGAAAA   | Translation |
|    | bdi77203p    | 1955382           | 3.0 | 1 | 20 | 748  | 767  | UUUUACACAUGAUUUGGGUU     | AACCAAAAUAUGUGUUUGAA     | Cleavage    |
| 60 | bdi77225p    | LOC_Os08g07380.1  | 3.0 | 1 | 21 | 1054 | 1073 | UCUCCUCCCGGUACCCUUCUU    | GAGAAGGG-ACUGGGAGGAGG    | Cleavage    |
| 61 | bdi7723b3p   | LOC_Os03g38330.1  | 2.5 | 1 | 24 | 2427 | 2450 | AUGAAGGUAGUAGUUUCAAUUGG  | CUGGUUUGGGGCUUCUACCUUCAU | Translation |
|    | bdi7723b3p   | CALP010156861.1-1 | 3.0 | 1 | 20 | 897  | 916  | AUGAAGGUAGUAGUUUCAA      | UAUGCAACUACUACUUUUUAU    | Cleavage    |
|    | bdi7723b5p   | CAJX011975998.1-2 | 2.5 | 1 | 20 | 1747 | 1766 | AUUUUGAUACUACUACCUUC     | CAAGGUACUGGUAUCAAAAU     | Cleavage    |
| 62 | bdi7723b5p   | CALP010201137.1-1 | 3.0 | 1 | 20 | 1417 | 1436 | AUUUUGAUACUACUACCUUC     | CAAGGUACUUGUAUCAAAAU     | Translation |
|    | bdi7723b5p   | CAJX010063404.1-1 | 3.0 | 1 | 20 | 1744 | 1763 | AUUUUGAUACUACUACCUUC     | CAAGGUACUAAUAUCAAAAU     | Translation |
| 63 | bdi7726a5p   | LOC_Os08g32880.1  | 2.5 | 1 | 22 | 1562 | 1582 | UGAUGAUGGUACGGACGUCGCG   | UGCGACGUCUGU-CCAUCAUCA   | Translation |
| 64 | bdi77275p    | CAJX010838887.1-1 | 3.0 | 1 | 20 | 612  | 631  | UGAUUAGUUUCAGUUGGUCU     | UGACCAACUGAUGUUAAUCA     | Translation |
| 65 | bdi7729a/b5p | 1958742           | 3.0 | 1 | 20 | 782  | 801  | UGUUUUCAUAGGCCAUGUAG     | CUGCAUUGCCUAUGAACACA     | Cleavage    |
| 66 | bdi77325p    | CALP010008998.1-1 | 3.0 | 1 | 23 | 513  | 534  | UUCUCCAAGAUCUCGGAGACUC   | GAAUCUCC-ACAUCUUGGAGGAA  | Cleavage    |
| 67 | bdi77345p    | CALP010002662.1-1 | 3.0 | 1 | 21 | 3932 | 3952 | UUGAACGUGACUGGGUUAACG    | UGCUAUCCAGUUUCGUUCA      | Cleavage    |
| 68 | bdi77355p    | Bradi2g39247.3    | 3.0 | 1 | 21 | 2307 | 2327 | UUGUUUUCCUUCUGCACUCCC    | GGGAGUGCAGCAGGAGGACAU    | Translation |
| 69 | bdi77415p.1  | CAJX010855541.1-1 | 2.5 | 1 | 20 | 2844 | 2863 | UUUUAUUUGUGGAAGCUCUU     | GAGCGCUCCACCAUUAAAA      | Cleavage    |
|    | bdi77415p.2  | CALP010000960.1-1 | 2.5 | 1 | 21 | 962  | 982  | UCUUGAAGUUUCGCAUGCAGU    | ACUGCUUGUGAAGCUUCAGGA    | Cleavage    |
| 70 | bdi77443p    | CAJX010060870.1-1 | 3.0 | 1 | 20 | 855  | 874  | CAUCGACAACUUUUGCCAUC     | GGUGGCCAAAGUUGUCGGUU     | Cleavage    |
|    | bdi77443p    | CAJX010069114.1-1 | 3.0 | 1 | 20 | 1996 | 2015 | CAUCGACAACUUUUGCCAUC     | GAAGGCAAAGUUUGUCGGUG     | Translation |
| 71 | bdi77473p    | LOC_Os03g63150.1  | 3.0 | 1 | 21 | 360  | 380  | AUCCUAUAACAAAACAACUG     | UAUUCUGUUUCGUUAUAGGAU    | Translation |
| 72 | bdi77475p    | 1978463           | 3.0 | 1 | 22 | 948  | 969  | AUCAGAUUGUUUGUUGUAGGA    | UACUACUACAAGACAUUCUGAU   | Cleavage    |
| 73 | bdi77503p    | LOC_Os08g42700.1  | 3.0 | 1 | 24 | 3092 | 3115 | CAUGGUCGGCAAUGAUACAGACGA | UCUGUUCUGCCAUGCCGACCAUG  | Cleavage    |
| 74 | bdi77523p    | CALP010065963.1-2 | 3.0 | 1 | 20 | 238  | 257  | AAAUGAUAGGUUGGAAGAA      | CUUUUCUAACUUAAUUUUU      | Cleavage    |
| 75 | bdi77525p    | 1959597           | 3.0 | 1 | 22 | 2522 | 2543 | AUGCUCUCCCAGUACAUUUU     | AGUAGGUGGUGGGAAGGCCAU    | Cleavage    |
| 76 | bdi77533p    | CALP010000002.1-1 | 3.0 | 1 | 20 | 5354 | 5373 | UGAGCAUGGAGAAGACAUG      | CAUGCAUUCUCCUUUGCUUA     | Cleavage    |
| 77 | bdi77535p    | LOC_Os11g29520.1  | 3.0 | 1 | 20 | 1012 | 1031 | AUGUCUUUGUCCUUGUCUAU     | AUGUGGAAGGAAAAGACAU      | Cleavage    |
| 78 | bdi77573p.1  | LOC_Os02g30150.1  | 3.0 | 1 | 21 | 65   | 85   | GGUAGUUGAAUGUUUUGUUUA    | UCAACAAGGCAUUCGACUACU    | Cleavage    |
| 79 | bdi77573p.2  | CALP010010840.1-1 | 2.5 | 1 | 21 | 1172 | 1192 | AGUAACUUGAUUAUGUAAGUG    | CACUCCAUAUCAAGCUAUCU     | Cleavage    |
|    | bdi77575p.1  | LOC_Os11g37850.1  | 1.0 | 1 | 21 | 1348 | 1368 | CACAAAACCUUCAGCUACCCA    | UGGGUAGCUGAAGGUUUUGUC    | Cleavage    |
|    | bdi77575p.1  | LOC_Os12g13550.1  | 1.0 | 1 | 21 | 1327 | 1347 | CACAAAACCUUCAGCUACCCA    | UGGGUAGCUGAAGGUUUUGUG    | Cleavage    |
|    | bdi77575p.1  | LOC_Os02g18000.1  | 1.5 | 1 | 21 | 1438 | 1458 | CACAAAACCUUCAGCUACCCA    | UGGGUAGCUGAAGGCUUUGUG    | Cleavage    |
|    | bdi77575p.1  | CAJX010062037.1-1 | 1.5 | 1 | 21 | 1393 | 1413 | CACAAAACCUUCAGCUACCCA    | UGGGUGGGUGAAGGUUUUGUG    | Cleavage    |
|    | bdi77575p.1  | CAJX010009340.1-2 | 1.5 | 1 | 21 | 1423 | 1443 | CACAAAACCUUCAGCUACCCA    | UGGGUGGGUGAAGGUUUUGUG    | Cleavage    |

|             |                   |     |   |    |      |      |                       |                       |          |
|-------------|-------------------|-----|---|----|------|------|-----------------------|-----------------------|----------|
| bdi77575p.1 | LOC_Os07g26430.1  | 1.5 | 1 | 21 | 2842 | 2862 | CACAAAACCUUCAGCUACCCA | UGGGUAGCUGAAGGUUUUGCG | Cleavage |
| bdi77575p.1 | Bradi4g10050.1    | 1.5 | 1 | 21 | 1411 | 1431 | CACAAAACCUUCAGCUACCCA | UGGGUUGUUGAAGGUUUUGUG | Cleavage |
| bdi77575p.1 | CAJX010846126.1-1 | 1.5 | 1 | 21 | 1333 | 1353 | CACAAAACCUUCAGCUACCCA | UGGGUAGCGGAGGGUUUUGUG | Cleavage |
| bdi77575p.1 | 1983462           | 2.5 | 1 | 21 | 1183 | 1203 | CACAAAACCUUCAGCUACCCA | UGGGUAGCUGAAGGGUUUGUA | Cleavage |
| bdi77575p.1 | LOC_Os11g37759.1  | 2.5 | 1 | 21 | 1345 | 1365 | CACAAAACCUUCAGCUACCCA | UGGGUAGCUGAAGGCUUUGUC | Cleavage |
| bdi77575p.1 | LOC_Os08g07330.2  | 2.0 | 1 | 21 | 1345 | 1365 | CACAAAACCUUCAGCUACCCA | UGGAUAGCUGAAGGUUUUGUU | Cleavage |
| bdi77575p.1 | 1971358           | 2.5 | 1 | 21 | 1354 | 1374 | CACAAAACCUUCAGCUACCCA | UGGGUAGCUGAAGGUUUUGUC | Cleavage |
| bdi77575p.1 | 1971306           | 2.0 | 1 | 21 | 1534 | 1554 | CACAAAACCUUCAGCUACCCA | UGGAUAGCUGAAGGUUUUGUU | Cleavage |
| bdi77575p.1 | CAJX010060256.1-1 | 2.5 | 1 | 21 | 1309 | 1329 | CACAAAACCUUCAGCUACCCA | UGGGUAGCUGAAGGUUUUCUC | Cleavage |
| bdi77575p.1 | CALP010021631.1-1 | 2.5 | 1 | 21 | 1437 | 1457 | CACAAAACCUUCAGCUACCCA | UGGGUAGCAGAAGGCUUUGUG | Cleavage |
| bdi77575p.1 | 1970912           | 2.0 | 1 | 21 | 3472 | 3492 | CACAAAACCUUCAGCUACCCA | UGGAUAGCUGAAGGUUUUGUA | Cleavage |
| bdi77575p.1 | Bradi4g44603.1    | 2.5 | 1 | 21 | 1348 | 1368 | CACAAAACCUUCAGCUACCCA | UGGGUGGCGGAAGGUUUUGUC | Cleavage |
| bdi77575p.1 | LOC_Os12g09240.1  | 2.5 | 1 | 21 | 1312 | 1332 | CACAAAACCUUCAGCUACCCA | UGGAUGGCUGAAGGUUUUGUC | Cleavage |
| bdi77575p.1 | Bradi4g44550.2    | 2.5 | 1 | 21 | 1342 | 1362 | CACAAAACCUUCAGCUACCCA | UGGGUGGCGGAAGGUUUUGUC | Cleavage |
| bdi77575p.1 | LOC_Os10g03570.1  | 2.0 | 1 | 21 | 1369 | 1389 | CACAAAACCUUCAGCUACCCA | UGGAUAGCAGAAGGUUUUGUG | Cleavage |
| bdi77575p.1 | Bradi4g44217.2    | 2.5 | 1 | 21 | 1351 | 1371 | CACAAAACCUUCAGCUACCCA | UGGGUGGCGGAAGGUUUUGUC | Cleavage |
| bdi77575p.1 | Bradi4g44227.1    | 2.5 | 1 | 21 | 1351 | 1371 | CACAAAACCUUCAGCUACCCA | UGGGUGGCGGAAGGUUUUGUC | Cleavage |
| bdi77575p.1 | Bradi4g44575.2    | 2.5 | 1 | 21 | 1342 | 1362 | CACAAAACCUUCAGCUACCCA | UGGGUGGCAGAAGGUUUUGUU | Cleavage |
| bdi77575p.1 | 1956664           | 2.5 | 1 | 21 | 1297 | 1317 | CACAAAACCUUCAGCUACCCA | UGGAUAGCUGAGGGUUUUGUU | Cleavage |
| bdi77575p.1 | CAJX010010925.1-1 | 2.5 | 1 | 21 | 1249 | 1269 | CACAAAACCUUCAGCUACCCA | UGGGUUGCUGAAGGUUUAGUG | Cleavage |
| bdi77575p.1 | LOC_Os12g31620.1  | 2.5 | 1 | 21 | 1369 | 1389 | CACAAAACCUUCAGCUACCCA | UGGAUAGCUGAAGGAUUUGUG | Cleavage |
| bdi77575p.1 | LOC_Os09g11020.1  | 3.0 | 1 | 21 | 1696 | 1716 | CACAAAACCUUCAGCUACCCA | UGGGUGGCUGAAGGUUUUUUA | Cleavage |
| bdi77575p.1 | CAJX010846077.1-1 | 2.5 | 1 | 21 | 1354 | 1374 | CACAAAACCUUCAGCUACCCA | UGGGUUGCUGAAGGCUUUGUG | Cleavage |
| bdi77575p.1 | Bradi4g09587.1    | 2.0 | 1 | 21 | 1330 | 1350 | CACAAAACCUUCAGCUACCCA | UGGGUAACCGAAGGUUUUGUG | Cleavage |
| bdi77575p.1 | LOC_Os08g15880.1  | 2.0 | 1 | 21 | 1222 | 1242 | CACAAAACCUUCAGCUACCCA | UGGAUUGCUGAAGGUUUUGUG | Cleavage |
| bdi77575p.1 | LOC_Os02g18070.1  | 2.5 | 1 | 21 | 1444 | 1464 | CACAAAACCUUCAGCUACCCA | UGGGUAGCAGAAGGCUUUGUG | Cleavage |
| bdi77575p.1 | CAJX010010925.1-2 | 2.0 | 1 | 21 | 1309 | 1329 | CACAAAACCUUCAGCUACCCA | UGGGUUGCUGAAGGUUUUGUG | Cleavage |
| bdi77575p.1 | LOC_Os01g05620.1  | 2.5 | 1 | 21 | 1312 | 1332 | CACAAAACCUUCAGCUACCCA | UGGGUUGCUGAAGGUUUCGUG | Cleavage |
| bdi77575p.1 | LOC_Os01g05600.1  | 2.5 | 1 | 21 | 1309 | 1329 | CACAAAACCUUCAGCUACCCA | UGGGUCGCUGAAGGCUUUGUG | Cleavage |
| bdi77575p.1 | LOC_Os10g22484.1  | 3.0 | 1 | 21 | 1372 | 1392 | CACAAAACCUUCAGCUACCCA | UGGGUGGCUGAAGGUUUUAUU | Cleavage |
| bdi77575p.1 | 1971217           | 2.5 | 1 | 21 | 1330 | 1350 | CACAAAACCUUCAGCUACCCA | UGGGUCGCUGAAGGCUUUGUG | Cleavage |
| bdi77575p.1 | 1971218           | 2.5 | 1 | 21 | 1330 | 1350 | CACAAAACCUUCAGCUACCCA | UGGGUCGCUGAAGGCUUUGUG | Cleavage |
| bdi77575p.1 | CAJX010844276.1-1 | 3.0 | 1 | 21 | 817  | 837  | CACAAAACCUUCAGCUACCCA | UGGAUGGCUGAAGGUUUCGUG | Cleavage |
| bdi77575p.1 | LOC_Os06g33360.1  | 3.0 | 1 | 21 | 1351 | 1371 | CACAAAACCUUCAGCUACCCA | UGGAUAGGUGAAGGUUUUGUC | Cleavage |
| bdi77575p.1 | Bradi4g10037.1    | 2.5 | 1 | 21 | 4030 | 4050 | CACAAAACCUUCAGCUACCCA | UGGGUUGCUGAAGGUUUCGUG | Cleavage |
| bdi77575p.1 | LOC_Os01g41890.1  | 3.0 | 1 | 21 | 1363 | 1383 | CACAAAACCUUCAGCUACCCA | UGGAUAGCUGAAGAUUUUGUC | Cleavage |
| bdi77575p.1 | 1969854           | 3.0 | 1 | 21 | 1345 | 1365 | CACAAAACCUUCAGCUACCCA | UGGGUUGCAGAAGGUUUUGUU | Cleavage |
| bdi77575p.1 | 1982629           | 3.0 | 1 | 21 | 1426 | 1446 | CACAAAACCUUCAGCUACCCA | UGGAUAGCAGAAGGUUUUGUA | Cleavage |
| bdi77575p.1 | Bradi4g09597.1    | 3.0 | 1 | 21 | 1480 | 1500 | CACAAAACCUUCAGCUACCCA | UGGAUAGCGGAAGGUUUUGUC | Cleavage |
| bdi77575p.1 | 1971330           | 3.0 | 1 | 21 | 1294 | 1314 | CACAAAACCUUCAGCUACCCA | UGGAUAGCUGAAGAUUUUGUU | Cleavage |
| bdi77575p.1 | 1979157           | 3.0 | 1 | 21 | 5749 | 5769 | CACAAAACCUUCAGCUACCCA | UGGAUUGCUGAAGGUUUUGUU | Cleavage |
| bdi77575p.1 | LOC_Os11g11770.1  | 3.0 | 1 | 21 | 1666 | 1686 | CACAAAACCUUCAGCUACCCA | UGGAUUGCUGAAGGUUUUGUG | Cleavage |
| bdi77575p.1 | 1984914           | 3.0 | 1 | 21 | 1366 | 1386 | CACAAAACCUUCAGCUACCCA | UGGAUUGCUGAAGGUUUUGUG | Cleavage |
| bdi77575p.2 | CAJX010860023.1-2 | 1.0 | 1 | 21 | 1315 | 1335 | CUUCCAUAUCAAAUCAUCUCU | AGAGAUGAUUUUGAUUGGAAA | Cleavage |
| bdi77575p.2 | LOC_Os11g37850.1  | 2.0 | 1 | 21 | 1327 | 1347 | CUUCCAUAUCAAAUCAUCUCU | AAGGAUGGUUUUGAUUGGAAG | Cleavage |
| bdi77575p.2 | CAJX010839115.1-1 | 2.5 | 1 | 21 | 946  | 966  | CUUCCAUAUCAAAUCAUCUCU | AAAGAUAGUUUGAUUGGAAG  | Cleavage |
| bdi77575p.2 | CAJX010069114.1-1 | 3.0 | 1 | 21 | 844  | 864  | CUUCCAUAUCAAAUCAUCUCU | AGAGAUUUCUGAUUGGAAG   | Cleavage |

|     |                |                   |     |   |    |      |      |                         |                         |             |
|-----|----------------|-------------------|-----|---|----|------|------|-------------------------|-------------------------|-------------|
| 82  | bdi77603p      | 1984863           | 3.0 | 1 | 22 | 1653 | 1674 | GGCUUUGCUCGGAGUGCUGUGG  | UUAUGGCACUGUGAGUAAAGCC  | Cleavage    |
| 83  | bdi77633p      | LOC_Os08g31780.1  | 3.0 | 1 | 20 | 2445 | 2464 | AUUCCEGUACGUC AAGAUUG   | CUAUCUAGAAGUACGGGAAU    | Translation |
| 84  | bdi77673p      | 1969834           | 2.5 | 1 | 20 | 2369 | 2388 | AGGAGCAAGCAGCUUGAAGG    | CAUUCAAGUUGCUUGCUCCA    | Cleavage    |
| 85  | bdi77703p      | LOC_Os08g10260.1  | 3.0 | 1 | 20 | 325  | 344  | UCUAGACGGGCCUUC AAGA    | ACUUUGAGGGCCCGUCUUGA    | Cleavage    |
| 86  | bdi77773p.2    | LOC_Os04g30660.1  | 2.5 | 1 | 21 | 2722 | 2742 | UGAGAUGGUGUCUGUUGAAGG   | CUUUCAACAGUCACCAUUUCG   | Translation |
| 87  | bdi77775p.2    | CALP010201137.1-1 | 2.0 | 1 | 20 | 1019 | 1038 | UCUGACAAACAGCAUCGCAA    | UUGCGGUGGGGUUUGCAGG     | Translation |
| 88  | bdi77795p      | Bradi2g09427.1    | 3.0 | 1 | 22 | 2826 | 2847 | GAGGUCAUUGUCAGACAUGGGA  | UCCAUGUCUGAAGAUGACGUC   | Translation |
|     | bdi77795p      | CALP010000064.1-2 | 3.0 | 1 | 20 | 4410 | 4429 | GAGGUCAUUGUCAGACAUGG    | CCAUGUUGGACAAGGACCUC    | Cleavage    |
| 89  | bdi77813p      | CALP010006274.1-1 | 3.0 | 1 | 23 | 95   | 117  | CAUGUCUGUAGUCAGAAAAUCA  | UGUUUUUCCUGAUUACAGAUUU  | Cleavage    |
| 90  | bdi77863p      | CAJX010874486.1-1 | 3.0 | 1 | 23 | 2508 | 2530 | UGCACAAACUGUGGAGUAGUCGG | UCGACUACCCGAUGGUUUGUGCA | Cleavage    |
| 91  | bdi77873p      | LOC_Os04g30530.1  | 3.0 | 1 | 20 | 800  | 818  | UGCUUCGGUCUGUCUUGGG     | UCCAAG-ACAGACUGAAGCA    | Cleavage    |
| 92  | bdi8273p       | 1983466           | 3.0 | 1 | 21 | 713  | 734  | UUAGAUGA-CCAUCAGCAAACA  | UUUUUGGUGAUGGCUCAUCUAA  | Translation |
| 93  | bdi9485        | CALP010000049.1-1 | 3.0 | 1 | 19 | 3456 | 3475 | UUAUGACGU-GUAGGAGUUG    | UAACUUCUACUACGUCAUAA    | Translation |
| 94  | bdi9494        | CAJX010067949.1-1 | 2.5 | 1 | 20 | 22   | 41   | UUCAUCACCUUCGUCUCCGU    | GCGGCGACGGGGUGAUGAA     | Cleavage    |
| 95  | bdi9497        | CALP010001516.1-1 | 3.0 | 1 | 21 | 564  | 584  | UUUCUGAAUACAUGGUGUAUC   | GGUGCACCAUGUGUUCAGUAA   | Cleavage    |
| 96  | osa1424        | 1969104           | 3.0 | 1 | 20 | 84   | 102  | AUGCACACUGAUGCUGAUUG    | CAUCAGC-UUGGUGUGCAU     | Cleavage    |
| 97  | osa1428a3p     | 1978463           | 3.0 | 1 | 20 | 2592 | 2611 | UAAGAUAAAGCCGUGAAUUU    | AAGUUUACGGCUUCAUUUUA    | Cleavage    |
| 98  | osa1435        | LOC_Os03g48320.1  | 3.0 | 1 | 20 | 1492 | 1511 | UUUCUUAAGUCAACUUUUU     | AAAGAGUUAGUCUUAAGGAA    | Translation |
|     | osa1435        | CAJX011976265.1-1 | 3.0 | 1 | 20 | 4804 | 4823 | UUUCUUAAGUCAACUUUUU     | AAAAGUUUGUUUUGAGAAA     | Translation |
| 99  | osa1437b3p     | Bradi2g39091.1    | 3.0 | 1 | 20 | 496  | 515  | GUGCUGGCGAGCUCGGGUC     | GUUUCGGAGCUCGUUGGCAU    | Cleavage    |
| 100 | osa1439        | CAJX010846863.1-1 | 3.0 | 1 | 21 | 480  | 500  | UUUUGGAACGGAGUGAGUAAU   | GAUGCUUUCUCUGUCCAAGA    | Cleavage    |
|     | osa1439        | CALP010006820.1-1 | 2.5 | 1 | 20 | 7    | 26   | UUUUGGAACGGAGUGAGUAAU   | GUACUCCCUCAUCCAAAA      | Translation |
| 101 | osa1440a       | LOC_Os04g30930.1  | 3.0 | 1 | 20 | 1470 | 1489 | UGCUCAAAUAACACUCUCCU    | AGGAGAGUUUUAAUUUGGGUA   | Translation |
|     | osa1440a       | CAJX010841171.1-1 | 3.0 | 1 | 20 | 682  | 701  | UGCUCAAAUAACACUCUCCU    | AGGAGAGUCAUCUUUGAGCA    | Translation |
| 102 | osa1440b       | LOC_Os03g63150.1  | 3.0 | 1 | 21 | 1647 | 1667 | UUUAGGAGAGUGGUAAUUUGAG  | CUCAGGUGCAUUUUCCUAAA    | Cleavage    |
| 103 | osa156c3p      | 1969164           | 2.5 | 1 | 22 | 816  | 837  | GCUCACUUCUCUCUCUGUCAGC  | GGUGAUAGAUGGGGAAGUGAGC  | Cleavage    |
| 104 | osa156f3p      | 1969164           | 2.5 | 1 | 22 | 816  | 837  | GCUCACUUCUCUUUCUGUCAGC  | GGUGAUAGAUGGGGAAGUGAGC  | Cleavage    |
| 105 | osa156g3p      | 1969164           | 2.5 | 1 | 22 | 816  | 837  | GCUCACUUCUCUCUCUGUCAGC  | GGUGAUAGAUGGGGAAGUGAGC  | Cleavage    |
| 106 | osa156h3p      | 1969164           | 2.5 | 1 | 22 | 816  | 837  | GCUCACUUCUCUUUCUGUCAGC  | GGUGAUAGAUGGGGAAGUGAGC  | Cleavage    |
| 107 | osa156i3p      | 1969164           | 2.5 | 1 | 22 | 816  | 837  | GCUCACUUCUCUUUCUGUCAGC  | GGUGAUAGAUGGGGAAGUGAGC  | Cleavage    |
| 108 | osa164c        | Bradi4g21890.1    | 3.0 | 1 | 21 | 2439 | 2459 | UGGAGAAGCAGGGUACGUGCA   | UGCACGUACCUUGGUUCUCUC   | Cleavage    |
|     | osa166i5p      | CAJX010060647.1-1 | 3.0 | 1 | 21 | 1920 | 1940 | GGAUUGUUGUCUGGUUCAAGG   | UCUAGACCAUACAACAAUCU    | Translation |
| 109 | osa166i5p      | CAJX011976265.1-1 | 3.0 | 1 | 21 | 4167 | 4187 | GGAUUGUUGUCUGGUUCAAGG   | UCUUGUACCACACAGCAAUCU   | Translation |
|     | osa166i5p      | 1979031           | 3.0 | 1 | 20 | 2623 | 2642 | GGAUUGUUGUCUGGUUCAAG    | CUUAAGCCAAACAACAUCU     | Translation |
| 110 | osa167a/c5p    | CALP010007316.1-1 | 2.0 | 1 | 21 | 268  | 288  | UGAAGCUGCCAGCAUGAUCUA   | UCGAUCAUGUUGGCAGCUUCG   | Cleavage    |
|     | osa167a/c5p    | LOC_Os07g29820.1  | 2.5 | 1 | 21 | 2609 | 2629 | UGAAGCUGCCAGCAUGAUCUA   | UAGAUC AUGCUGACAGCCUCA  | Translation |
| 111 | osa167b        | CALP010007316.1-1 | 2.0 | 1 | 21 | 268  | 288  | UGAAGCUGCCAGCAUGAUCUA   | UCGAUCAUGUUGGCAGCUUCG   | Cleavage    |
|     | osa167b        | LOC_Os07g29820.1  | 2.5 | 1 | 21 | 2609 | 2629 | UGAAGCUGCCAGCAUGAUCUA   | UAGAUC AUGCUGACAGCCUCA  | Translation |
| 112 | osa167d_j5p    | CALP010007316.1-1 | 2.0 | 1 | 20 | 269  | 288  | UGAAGCUGCCAGCAUGAUCU    | CGAUCAUGUUGGCAGCUUCG    | Cleavage    |
| 113 | osa167d_j5p    | LOC_Os07g29820.1  | 2.5 | 1 | 21 | 2609 | 2629 | UGAAGCUGCCAGCAUGAUCUG   | UAGAUC AUGCUGACAGCCUCA  | Translation |
| 114 | osa171i5p      | 1957103           | 3.0 | 1 | 21 | 3516 | 3535 | AGGUAAUUGGCGUGCCUCAAU   | GAUUGAGGCACGCCA-UGCCU   | Cleavage    |
|     | osa171i5p      | CAJX010859885.1-2 | 3.0 | 1 | 20 | 798  | 817  | AGGUAAUUGGCGUGCCUCAAU   | GUUGACGCACGCCAUGCCA     | Cleavage    |
| 115 | osa172b        | CALP010014150.1-1 | 3.0 | 1 | 21 | 576  | 596  | GGAUCUUGAUGAUGCUGCAU    | AGGCAGCAUCAUGGAGGUUCC   | Translation |
| 116 | osa1846a/b/c5p | CAJX010851447.1-1 | 2.5 | 1 | 21 | 1929 | 1949 | AGUGAGGAGGCCGGGGCCGCU   | GGCAGCUCUGGCCUCUUCACU   | Cleavage    |
| 117 | osa1847.1      | CALP010197779.1-1 | 3.0 | 1 | 20 | 369  | 388  | UGCAGUUUGCAGUUGUGGCA    | AACCAUAAUUGCAAACUGCA    | Cleavage    |
| 118 | osa1850.3      | 1969591           | 2.5 | 1 | 22 | 439  | 460  | CUGUUUAGUUCACAUCAAUCU   | AGUAAUGAUGUGAACCAAACAG  | Cleavage    |
| 119 | osa18543p      | LOC_Os10g21400.1  | 3.0 | 1 | 20 | 2260 | 2279 | UCCAUUUGGGGAUUUGCUG     | GAGGAAGUCCUCAAUUUGGA    | Cleavage    |

|      |           |                   |     |   |    |      |      |                          |                         |             |
|------|-----------|-------------------|-----|---|----|------|------|--------------------------|-------------------------|-------------|
| 120  | osa18545p | LOC_Os04g46300.1  | 2.5 | 1 | 20 | 1941 | 1960 | UGGUGAAAUUUGUAGAUUGG     | CCGAUCUGCAGAUUUCACCU    | Cleavage    |
|      | osa18545p | 1955400           | 2.5 | 1 | 20 | 42   | 61   | UGGUGAAAUUUGUAGAUUGG     | UCAAUCCAUAUUUUAUCA      | Cleavage    |
| 121  | osa18575p | LOC_Os05g41310.1  | 3.0 | 1 | 21 | 2606 | 2626 | UGGUUUUUUUGGAGCAUGAGG    | CCUCAUGCUCACAAUAUA      | Cleavage    |
| 122  | osa1859   | LOC_Os11g28950.1  | 3.0 | 1 | 22 | 1145 | 1166 | UUUCCU AUGACGUCCA UUCCAA | UCGGAAUGGAGAUAAUAGGAAA  | Translation |
| 123  | osa18605p | CAJX011980239.1-1 | 3.0 | 1 | 21 | 2396 | 2416 | AGAAAACCAGCUUCCAGAU CU   | AGCUGAGGAAGCUGGUUUUCU   | Cleavage    |
| 124  | osa1862e  | 1983462           | 3.0 | 1 | 20 | 421  | 440  | CUAGAUUUUGUUUAUUUUGGG    | CCAGGAAUAAGCAAUCUGG     | Cleavage    |
| 125  | osa1863c  | LOC_Os04g24700.1  | 2.5 | 1 | 21 | 713  | 733  | UAGAAACUUGGCUAGUCAU U    | AAUGCAUCGGCAUUGUUUCU    | Translation |
| 126  | osa18665p | CALP010009414.1-1 | 3.0 | 1 | 20 | 377  | 396  | GAGGGAUUUUGCGGGAAUUU     | AAAUUACCGAGAAUCCUUC     | Translation |
| 127  | osa1871   | CALP010000274.1-1 | 3.0 | 1 | 24 | 2795 | 2818 | AUGGCUCUGAUUCAUGUUGGUU   | AGGCCGGCAUGAUUCAUAGUCAU | Cleavage    |
| 128  | osa1876   | CALP010001285.1-1 | 2.5 | 1 | 21 | 1010 | 1030 | AUAAGUGGGUUUGUGGGCUGG    | UCAGCUCACAAAUAUUUAU     | Translation |
| 129  | osa1877   | CALP010004699.1-2 | 2.0 | 1 | 20 | 1936 | 1955 | AGAUGACAUGUGAAUGAUGA     | UCAUCAUUCGCCUGUUAUCU    | Translation |
| 130  | osa20935p | Bradi2g21360.1    | 3.0 | 1 | 20 | 1724 | 1743 | GUGCAUUAAUUGGAAGAACA     | UGUUCUCCAUAUAAGGUAC     | Cleavage    |
| 131  | osa20943p | LOC_Os11g37880.1  | 3.0 | 1 | 20 | 2386 | 2405 | CAGAGCUGUGGCAUCCACGU     | GCGAGGAUGCCGAGCUCUG     | Cleavage    |
| 132  | osa20973p | CALP010007726.1-1 | 3.0 | 1 | 22 | 21   | 42   | UUCUCUUCUUCGUGUCGCAUUU   | AAAUGUGACAGGAAAAGGAGAA  | Cleavage    |
| 133  | osa20995p | CALP010002187.1-1 | 2.5 | 1 | 20 | 1029 | 1048 | UGAAUAUGUUUGUACAAGCU     | AGAUUGCACAGACAUUAUCA    | Cleavage    |
|      | osa2118a  | 1957255           | 2.5 | 1 | 21 | 1830 | 1850 | UUCCCAAUGCCUCCAUGCCU     | GGGUAUGGGUGGCCUUGGGAA   | Cleavage    |
|      | osa2118a  | 1957255           | 3.0 | 1 | 21 | 1830 | 1850 | UUCCCGAUGCCUCCAUGCCU     | GGGUAUGGGUGGCCUUGGGAA   | Cleavage    |
|      | osa2118a  | 1957255           | 2.5 | 1 | 21 | 1830 | 1850 | UUCCCAAUGCCUCCAUGCCU     | GGGUAUGGGUGGCCUUGGGAA   | Cleavage    |
|      | osa2118a  | 1969834           | 3.0 | 1 | 20 | 595  | 613  | UUCCUAGUGCCUCCA U UCC    | GGAAUGGGUGG-ACUAGGAA    | Cleavage    |
|      | osa2118a  | 1969976           | 3.0 | 1 | 20 | 238  | 257  | UUCCCAAUGCCUCCAUGCC      | GGUAUUGGAGGCAUUGGCAA    | Cleavage    |
|      | osa2118a  | 1969976           | 3.0 | 1 | 20 | 238  | 257  | UUCCCAAUGCCUCCAUGCC      | GGUAUUGGAGGCAUUGGCAA    | Cleavage    |
|      | osa2118a  | 1970749           | 3.0 | 1 | 21 | 1299 | 1319 | UUCUCGAUGCCUCCA U UCCU   | GGGAAUGGGUGGCCUUGGGAA   | Cleavage    |
|      | osa2118a  | 1970749           | 2.5 | 1 | 21 | 1299 | 1319 | UUCCCGAUGCCUCCA U UCCU   | GGGAAUGGGUGGCCUUGGGAA   | Cleavage    |
|      | osa2118a  | 1970749           | 3.0 | 1 | 21 | 1299 | 1319 | UUCCCGAUGCCUCCA U UCCU   | GGGAAUGGGUGGCCUUGGGAA   | Translation |
|      | osa2118a  | 1970749           | 3.0 | 1 | 21 | 1299 | 1319 | UUCCCAAUGCCUCCA U GCCU   | GGGAAUGGGUGGCCUUGGGAA   | Translation |
| 134* | osa2118a  | 1970749           | 3.0 | 1 | 21 | 1299 | 1319 | UUCUGAUGCCUCCA U UCCU    | GGGAAUGGGUGGCCUUGGGAA   | Cleavage    |
|      | osa2118a  | 1970749           | 2.5 | 1 | 21 | 1299 | 1319 | UUCUAAUGCCUCCA U UCCU    | GGGAAUGGGUGGCCUUGGGAA   | Cleavage    |
|      | osa2118a  | 1970749           | 3.0 | 1 | 21 | 1299 | 1319 | UUCUAGUGCCUCCA U UCCU    | GGGAAUGGGUGGCCUUGGGAA   | Cleavage    |
|      | osa2118a  | 1970749           | 3.0 | 1 | 21 | 1299 | 1319 | UUCUGAUGCCUCCA U UCCU    | GGGAAUGGGUGGCCUUGGGAA   | Cleavage    |
|      | osa2118a  | 1970749           | 3.0 | 1 | 21 | 1299 | 1319 | UUCUAAUGCUCCA U UCCU     | GGGAAUGGGUGGCCUUGGGAA   | Cleavage    |
|      | osa2118a  | 1970749           | 3.0 | 1 | 21 | 1299 | 1319 | UUCUGAUGCCUCCA U UCCU    | GGGAAUGGGUGGCCUUGGGAA   | Cleavage    |
|      | osa2118a  | 1970749           | 2.5 | 1 | 21 | 1299 | 1319 | UUCCCGAUGCCUCCA U UCCU   | GGGAAUGGGUGGCCUUGGGAA   | Cleavage    |
|      | osa2118a  | 1970749           | 3.0 | 1 | 21 | 1299 | 1319 | UUCCCGAUGCCUCCA U UCCU   | GGGAAUGGGUGGCCUUGGGAA   | Translation |
|      | osa2118a  | 1970749           | 3.0 | 1 | 21 | 1299 | 1319 | UUCCCAAUGCCUCCA U GCCU   | GGGAAUGGGUGGCCUUGGGAA   | Cleavage    |
|      | osa2118a  | 1973916           | 3.0 | 1 | 22 | 314  | 335  | UUCUCGAUGCCUCCA U UCCUA  | UAGGCAUGGGAGGGAUUGGGAA  | Cleavage    |
|      | osa2118a  | 1973916           | 2.5 | 1 | 22 | 314  | 335  | UUCCCGAUGCCUCCA U UCCUA  | UAGGCAUGGGAGGGAUUGGGAA  | Cleavage    |
|      | osa2118a  | 1973916           | 3.0 | 1 | 22 | 314  | 335  | UUCCCGAUGCCUCCA U UCCUA  | UAGGCAUGGGAGGGAUUGGGAA  | Cleavage    |
|      | osa2118b  | 1973916           | 2.0 | 1 | 22 | 314  | 335  | UUCUGAUGCCUCCA U GCCUA   | UAGGCAUGGGAGGGAUUGGGAA  | Cleavage    |
|      | osa2118b  | 1973916           | 1.0 | 1 | 22 | 314  | 335  | UUCCCAAUGCCUCCA U GCCUA  | UAGGCAUGGGAGGGAUUGGGAA  | Cleavage    |
|      | osa2118b  | 1973916           | 3.0 | 1 | 22 | 314  | 335  | UUCCUAAUGCCUCCA U UCCUA  | UAGGCAUGGGAGGGAUUGGGAA  | Cleavage    |
|      | osa2118b  | 1973916           | 2.5 | 1 | 22 | 314  | 335  | UUCCUAAUGCCUCCA U UCCUA  | UAGGCAUGGGAGGGAUUGGGAA  | Cleavage    |
|      | osa2118b  | 1973916           | 3.0 | 1 | 22 | 314  | 335  | UUCCUAGUGCCUCCA U UCCUA  | UAGGCAUGGGAGGGAUUGGGAA  | Cleavage    |
|      | osa2118b  | 1973916           | 3.0 | 1 | 22 | 314  | 335  | UUCUGAUGCCUCCA U UCCUA   | UAGGCAUGGGAGGGAUUGGGAA  | Cleavage    |
|      | osa2118b  | 1973916           | 3.0 | 1 | 22 | 314  | 335  | UUCCUAAUGCUCCA U UCCUA   | UAGGCAUGGGAGGGAUUGGGAA  | Cleavage    |
|      | osa2118b  | 1973916           | 3.0 | 1 | 22 | 314  | 335  | UUCUGAUGCCUCCA U UCCUA   | UAGGCAUGGGAGGGAUUGGGAA  | Cleavage    |
|      | osa2118b  | 1973916           | 2.5 | 1 | 22 | 314  | 335  | UUCCCGAUGCCUCCA U UCCUA  | UAGGCAUGGGAGGGAUUGGGAA  | Translation |
|      | osa2118b  | 1973916           | 1.5 | 1 | 22 | 314  | 335  | UUCCCGAUGCCUCCA U GCCUA  | UAGGCAUGGGAGGGAUUGGGAA  | Translation |



|      |          |                |     |   |    |      |      |                        |                        |             |
|------|----------|----------------|-----|---|----|------|------|------------------------|------------------------|-------------|
|      | osa2118b | 1973916        | 3.0 | 1 | 22 | 314  | 335  | UUCCCGAUGCCUCCAUUCCUA  | UAGGCAUGGGAGGGAUUGGGAA | Cleavage    |
|      | osa2118b | 1973916        | 1.0 | 1 | 22 | 314  | 335  | UUCCCAAUGCCUCCAUUGCCUA | UAGGCAUGGGAGGGAUUGGGAA | Cleavage    |
|      | osa2118b | 1976660        | 3.0 | 1 | 20 | 1300 | 1319 | UUCCCGAUGCCUCCAUUCC    | GGAAUGGGUGGUCUUGGGAA   | Cleavage    |
|      | osa2118b | 1976660        | 3.0 | 1 | 20 | 1300 | 1319 | UUCUAAUGCCUCCAUUCC     | GGAAUGGGUGGUCUUGGGAA   | Cleavage    |
|      | osa2118b | 1976660        | 3.0 | 1 | 20 | 1300 | 1319 | UUCCCGAUGCCUCCAUUCC    | GGAAUGGGUGGUCUUGGGAA   | Cleavage    |
|      | osa2118b | 1976664        | 3.0 | 1 | 21 | 1245 | 1265 | UUCUCGAUGCCUCCAUUCCU   | GGGAAUGGGUGGCUUGGGAA   | Cleavage    |
|      | osa2118b | 1976664        | 2.5 | 1 | 21 | 1245 | 1265 | UUCCGAUGCCUCCAUUCCU    | GGGAAUGGGUGGCUUGGGAA   | Cleavage    |
| 135* | osa2118b | 1976664        | 3.0 | 1 | 21 | 1245 | 1265 | UUCCCGAUGCCUCCAUUCCU   | GGGAAUGGGUGGCUUGGGAA   | Translation |
|      | osa2118b | 1976664        | 3.0 | 1 | 21 | 1245 | 1265 | UUCCCAAUGCCUCCAUUGCCU  | GGGAAUGGGUGGCUUGGGAA   | Cleavage    |
|      | osa2118b | 1976664        | 3.0 | 1 | 21 | 1245 | 1265 | UUCUGAUGCCUCCAUUCCU    | GGGAAUGGGUGGCUUGGGAA   | Cleavage    |
|      | osa2118b | 1976664        | 2.5 | 1 | 21 | 1245 | 1265 | UUCUAAUGCCUCCAUUCCU    | GGGAAUGGGUGGCUUGGGAA   | Cleavage    |
|      | osa2118b | 1976664        | 3.0 | 1 | 21 | 1245 | 1265 | UUCUJAGUGCCUCCAUUCCU   | GGGAAUGGGUGGCUUGGGAA   | Cleavage    |
|      | osa2118b | 1976664        | 3.0 | 1 | 21 | 1245 | 1265 | UUCUGAUGCCUCCAUUCCU    | GGGAAUGGGUGGCUUGGGAA   | Cleavage    |
|      | osa2118b | 1976664        | 3.0 | 1 | 21 | 1245 | 1265 | UUCUAAUGCUUCCAUUCCU    | GGGAAUGGGUGGCUUGGGAA   | Cleavage    |
|      | osa2118b | 1976664        | 3.0 | 1 | 21 | 1245 | 1265 | UUCUGAUGCCUCCAUUCCU    | GGGAAUGGGUGGCUUGGGAA   | Cleavage    |
|      | osa2118b | 1976664        | 2.5 | 1 | 21 | 1245 | 1265 | UUCCGAUGCCUCCAUUCCU    | GGGAAUGGGUGGCUUGGGAA   | Translation |
|      | osa2118b | 1976664        | 3.0 | 1 | 21 | 1245 | 1265 | UUCCGAUGCCUCCAUUCCU    | GGGAAUGGGUGGCUUGGGAA   | Translation |
|      | osa2118b | 1976664        | 3.0 | 1 | 21 | 1245 | 1265 | UUCCCAAUGCCUCCAUUGCCU  | GGGAAUGGGUGGCUUGGGAA   | Cleavage    |
|      | osa2118b | 1979851        | 2.5 | 1 | 22 | 614  | 635  | UUCUCGAUGCCUCCAUUCCUA  | UGGGAAUUGGAGGAAUCGGGAA | Translation |
|      | osa2118b | 1979851        | 2.0 | 1 | 22 | 614  | 635  | UUCCCGAUGCCUCCAUUCCUA  | UGGGAAUUGGAGGAAUCGGGAA | Cleavage    |
|      | osa2118b | 1979851        | 2.0 | 1 | 22 | 614  | 635  | UUCCCGAUGCCUCCAUUCCUA  | UGGGAAUUGGAGGAAUCGGGAA | Cleavage    |
|      | osa2118b | 1979851        | 2.5 | 1 | 22 | 614  | 635  | UUCUGAUGCCUCCAUUCCUA   | UGGGAAUUGGAGGAAUCGGGAA | Cleavage    |
|      | osa2118b | 1979851        | 3.0 | 1 | 22 | 614  | 635  | UUCUGAUGCCUCCAUUCCUA   | UGGGAAUUGGAGGAAUCGGGAA | Cleavage    |
|      | osa2118b | 1979851        | 2.5 | 1 | 22 | 614  | 635  | UUCUGAUGCCUCCAUUCCUA   | UGGGAAUUGGAGGAAUCGGGAA | Translation |
|      | osa2118b | 1979851        | 3.0 | 1 | 22 | 614  | 635  | UUCUGAUGCCUCCAUUCCUA   | UGGGAAUUGGAGGAAUCGGGAA | Translation |
|      | osa2118c | 1979851        | 2.5 | 1 | 22 | 614  | 635  | UUCUGAUGCCUCCAUUCCUA   | UGGGAAUUGGAGGAAUCGGGAA | Cleavage    |
|      | osa2118c | 1979851        | 2.0 | 1 | 22 | 614  | 635  | UUCCCGAUGCCUCCAUUCCUA  | UGGGAAUUGGAGGAAUCGGGAA | Cleavage    |
|      | osa2118c | 1979851        | 3.0 | 1 | 22 | 614  | 635  | UUCCCGAUGCCUCCAUUGCCUA | UGGGAAUUGGAGGAAUCGGGAA | Cleavage    |
|      | osa2118c | 1979851        | 2.0 | 1 | 22 | 614  | 635  | UUCCCGAUGCCUCCAUUCCUA  | UGGGAAUUGGAGGAAUCGGGAA | Translation |
|      | osa2118c | Bradi2g03260.1 | 2.5 | 1 | 21 | 573  | 593  | UUCUCGAUGCCUCCAUUCCU   | AGGAAUGGGAGGCAUUGGCAA  | Cleavage    |
|      | osa2118c | Bradi2g03260.1 | 2.0 | 1 | 21 | 573  | 593  | UUCCCGAUGCCUCCAUUCCU   | AGGAAUGGGAGGCAUUGGCAA  | Cleavage    |
|      | osa2118c | Bradi2g03260.1 | 2.5 | 1 | 21 | 573  | 593  | UUCCCGAUGCCUCCAUUCCU   | AGGAAUGGGAGGCAUUGGCAA  | Cleavage    |
|      | osa2118c | Bradi2g03260.1 | 2.5 | 1 | 21 | 573  | 593  | UUCCCAAUGCCUCCAUUGCCU  | AGGAAUGGGAGGCAUUGGCAA  | Cleavage    |
|      | osa2118c | Bradi2g03260.1 | 2.5 | 1 | 21 | 573  | 593  | UUCUGAUGCCUCCAUUCCU    | AGGAAUGGGAGGCAUUGGCAA  | Cleavage    |
|      | osa2118c | Bradi2g03260.1 | 2.0 | 1 | 21 | 573  | 593  | UUCUAAUGCCUCCAUUCCU    | AGGAAUGGGAGGCAUUGGCAA  | Translation |
|      | osa2118c | Bradi2g03260.1 | 3.0 | 1 | 21 | 573  | 593  | UUCUGAUGCCUCCAUUCCU    | AGGAAUGGGAGGCAUUGGCAA  | Cleavage    |
|      | osa2118c | Bradi2g03260.1 | 2.5 | 1 | 21 | 573  | 593  | UUCUJAGUGCCUCCAUUCCU   | AGGAAUGGGAGGCAUUGGCAA  | Cleavage    |
|      | osa2118c | Bradi2g03260.1 | 2.5 | 1 | 21 | 573  | 593  | UUCUGAUGCCUCCAUUCCU    | AGGAAUGGGAGGCAUUGGCAA  | Cleavage    |
|      | osa2118c | Bradi2g03260.1 | 3.0 | 1 | 21 | 573  | 593  | UUCCGAUGCCUCCAUUCCU    | AGGAAUGGGAGGCAUUGGCAA  | Cleavage    |
|      | osa2118c | Bradi2g03260.1 | 2.5 | 1 | 21 | 573  | 593  | UUCCGAUGCCUCCAUUGCCU   | AGGAAUGGGAGGCAUUGGCAA  | Cleavage    |
|      | osa2118c | Bradi2g03260.1 | 2.5 | 1 | 21 | 573  | 593  | UUCCCAAUGCCUCCAUUGCCU  | AGGAAUGGGAGGCAUUGGCAA  | Cleavage    |
|      | osa2118c | Bradi2g03260.1 | 2.5 | 1 | 21 | 573  | 593  | UUCCCAAUGCCUCCAUUGCCU  | AGGAAUGGGAGGCAUUGGCAA  | Cleavage    |
|      | osa2118c | Bradi2g38800.1 | 3.0 | 1 | 21 | 1458 | 1478 | UUCUCGAUGCCUCCAUUCCU   | GGGAAUGGGGGUCUUGGGAA   | Cleavage    |
|      | osa2118c | Bradi2g38800.1 | 2.5 | 1 | 21 | 1458 | 1478 | UUCCCGAUGCCUCCAUUCCU   | GGGAAUGGGGGUCUUGGGAA   | Cleavage    |

|      |          |                |     |   |    |      |      |                       |                        |             |
|------|----------|----------------|-----|---|----|------|------|-----------------------|------------------------|-------------|
|      | osa2118c | Bradi2g38800.1 | 3.0 | 1 | 21 | 1458 | 1478 | UUCCCGAUGCCUCCAUUCCU  | GGGAAUGGGGGUCUUGGGAA   | Cleavage    |
|      | osa2118d | Bradi2g38800.1 | 3.0 | 1 | 21 | 1458 | 1478 | UUCCCAAUGCCUCCAUUGCCU | GGGAAUGGGGGUCUUGGGAA   | Cleavage    |
|      | osa2118d | Bradi2g38800.1 | 3.0 | 1 | 21 | 1458 | 1478 | UUCUGAUGCCUCCAUUCCU   | GGGAAUGGGGGUCUUGGGAA   | Translation |
|      | osa2118d | Bradi2g38800.1 | 2.5 | 1 | 21 | 1458 | 1478 | UUCUAAUGCCUCCAUUCCU   | GGGAAUGGGGGUCUUGGGAA   | Cleavage    |
|      | osa2118d | Bradi2g38800.1 | 3.0 | 1 | 21 | 1458 | 1478 | UUCUAGUGCCUCCAUUCCU   | GGGAAUGGGGGUCUUGGGAA   | Cleavage    |
|      | osa2118d | Bradi2g38800.1 | 3.0 | 1 | 21 | 1458 | 1478 | UUCUGAUGCCUCCAUUCCU   | GGGAAUGGGGGUCUUGGGAA   | Cleavage    |
|      | osa2118d | Bradi2g38800.1 | 3.0 | 1 | 21 | 1458 | 1478 | UUCUAAUGCUUCCAUUCCU   | GGGAAUGGGGGUCUUGGGAA   | Translation |
|      | osa2118d | Bradi2g38800.1 | 3.0 | 1 | 21 | 1458 | 1478 | UUCUGAUGCCUCCAUUCCU   | GGGAAUGGGGGUCUUGGGAA   | Translation |
|      | osa2118d | Bradi2g38800.1 | 2.5 | 1 | 21 | 1458 | 1478 | UUCCGAUGCCUCCAUUCCU   | GGGAAUGGGGGUCUUGGGAA   | Cleavage    |
| 137* | osa2118d | Bradi2g38800.1 | 3.0 | 1 | 21 | 1458 | 1478 | UUCCGAUGCCUCCAUUCCU   | GGGAAUGGGGGUCUUGGGAA   | Cleavage    |
|      | osa2118d | Bradi2g38800.1 | 3.0 | 1 | 21 | 1458 | 1478 | UUCCCAAUGCCUCCAUUGCCU | GGGAAUGGGGGUCUUGGGAA   | Cleavage    |
|      | osa2118d | Bradi2g38810.1 | 3.0 | 1 | 21 | 1452 | 1472 | UUCUCGAUGCCUCCAUUCCU  | GGGAAUGGGGGUCUUGGGAA   | Cleavage    |
|      | osa2118d | Bradi2g38810.1 | 2.5 | 1 | 21 | 1452 | 1472 | UUCCGAUGCCUCCAUUCCU   | GGGAAUGGGGGUCUUGGGAA   | Cleavage    |
|      | osa2118d | Bradi2g38810.1 | 3.0 | 1 | 21 | 1452 | 1472 | UUCCGAUGCCUCCAUUCCU   | GGGAAUGGGGGUCUUGGGAA   | Cleavage    |
|      | osa2118d | Bradi2g38810.1 | 3.0 | 1 | 21 | 1452 | 1472 | UUCCCAAUGCCUCCAUUGCCU | GGGAAUGGGGGUCUUGGGAA   | Cleavage    |
|      | osa2118d | Bradi2g38810.1 | 3.0 | 1 | 21 | 1452 | 1472 | UUCUGAUGCCUCCAUUCCU   | GGGAAUGGGGGUCUUGGGAA   | Cleavage    |
|      | osa2118d | Bradi2g38810.1 | 3.0 | 1 | 21 | 1452 | 1472 | UUCUGAUGCCUCCAUUCCU   | GGGAAUGGGGGUCUUGGGAA   | Cleavage    |
|      | osa2118d | Bradi2g38810.1 | 2.5 | 1 | 21 | 1452 | 1472 | UUCUAAUGCCUCCAUUCCU   | GGGAAUGGGGGUCUUGGGAA   | Cleavage    |
|      | osa2118d | Bradi2g38810.1 | 3.0 | 1 | 21 | 1452 | 1472 | UUCUAGUGCCUCCAUUCCU   | GGGAAUGGGGGUCUUGGGAA   | Translation |
|      | osa2118d | Bradi2g38810.1 | 3.0 | 1 | 21 | 1452 | 1472 | UUCUGAUGCCUCCAUUCCU   | GGGAAUGGGGGUCUUGGGAA   | Cleavage    |
|      | osa2118e | Bradi2g38810.1 | 3.0 | 1 | 21 | 1452 | 1472 | UUCUAAUGCUUCCAUUCCU   | GGGAAUGGGGGUCUUGGGAA   | Cleavage    |
|      | osa2118e | Bradi2g38810.1 | 3.0 | 1 | 21 | 1452 | 1472 | UUCUGAUGCCUCCAUUCCU   | GGGAAUGGGGGUCUUGGGAA   | Translation |
|      | osa2118e | Bradi2g38810.1 | 2.5 | 1 | 21 | 1452 | 1472 | UUCCGAUGCCUCCAUUCCU   | GGGAAUGGGGGUCUUGGGAA   | Translation |
|      | osa2118e | Bradi2g38810.1 | 3.0 | 1 | 21 | 1452 | 1472 | UUCCGAUGCCUCCAUUCCU   | GGGAAUGGGGGUCUUGGGAA   | Translation |
|      | osa2118e | Bradi2g38810.1 | 3.0 | 1 | 21 | 1452 | 1472 | UUCCCAAUGCCUCCAUUGCCU | GGGAAUGGGGGUCUUGGGAA   | Translation |
|      | osa2118e | Bradi3g03882.1 | 3.0 | 1 | 19 | 1150 | 1169 | UUCUGAUGC-CUCCAUUC    | GACUGGGAGGAUCAGGAA     | Cleavage    |
|      | osa2118e | Bradi3g03882.1 | 3.0 | 1 | 19 | 1150 | 1169 | UUCUGAUGC-CUCCAUUC    | GACUGGGAGGAUCAGGAA     | Cleavage    |
|      | osa2118e | Bradi3g03882.1 | 3.0 | 1 | 19 | 1150 | 1169 | UUCUGAUGC-CUCCAUUC    | GACUGGGAGGAUCAGGAA     | Translation |
|      | osa2118e | Bradi4g14697.1 | 3.0 | 1 | 22 | 536  | 557  | UUCUCGAUGCCUCCAUUCCUA | UGGGCAUGGGAGGUGUUGGGAA | Cleavage    |
|      | osa2118e | Bradi4g14697.1 | 2.5 | 1 | 22 | 536  | 557  | UUCCGAUGCCUCCAUUCCUA  | UGGGCAUGGGAGGUGUUGGGAA | Cleavage    |
|      | osa2118e | Bradi4g14697.1 | 3.0 | 1 | 22 | 536  | 557  | UUCCGAUGCCUCCAUUCCUA  | UGGGCAUGGGAGGUGUUGGGAA | Cleavage    |
|      | osa2118e | Bradi4g14697.1 | 3.0 | 1 | 22 | 536  | 557  | UUCUGAUGCCUCCAUUGCCUA | UGGGCAUGGGAGGUGUUGGGAA | Cleavage    |
|      | osa2118e | Bradi4g14697.1 | 2.0 | 1 | 22 | 536  | 557  | UUCUGAUGCCUCCAUUGCCUA | UGGGCAUGGGAGGUGUUGGGAA | Cleavage    |
|      | osa2118e | Bradi4g14697.1 | 1.0 | 1 | 22 | 536  | 557  | UUCCAAUGCCUCCAUUGCCUA | UGGGCAUGGGAGGUGUUGGGAA | Cleavage    |
|      | osa2118e | Bradi4g14697.1 | 3.0 | 1 | 22 | 536  | 557  | UUCUGAUGCCUCCAUUCCUA  | UGGGCAUGGGAGGUGUUGGGAA | Cleavage    |
|      | osa2118e | Bradi4g14697.1 | 2.5 | 1 | 22 | 536  | 557  | UUCUAAUGCCUCCAUUCCUA  | UGGGCAUGGGAGGUGUUGGGAA | Cleavage    |
|      | osa2118e | Bradi4g14697.1 | 3.0 | 1 | 22 | 536  | 557  | UUCUAGUGCCUCCAUUCCUA  | UGGGCAUGGGAGGUGUUGGGAA | Cleavage    |
|      | osa2118e | Bradi4g14697.1 | 3.0 | 1 | 22 | 536  | 557  | UUCUGAUGCCUCCAUUCCUA  | UGGGCAUGGGAGGUGUUGGGAA | Cleavage    |
|      | osa2118e | Bradi4g14697.1 | 3.0 | 1 | 22 | 536  | 557  | UUCUAAUGCUUCCAUUCCUA  | UGGGCAUGGGAGGUGUUGGGAA | Cleavage    |
|      | osa2118e | Bradi4g14697.1 | 3.0 | 1 | 22 | 536  | 557  | UUCUGAUGCCUCCAUUCCUA  | UGGGCAUGGGAGGUGUUGGGAA | Cleavage    |
|      | osa2118e | Bradi4g14697.1 | 2.5 | 1 | 22 | 536  | 557  | UUCUGAUGCCUCCAUUCCUA  | UGGGCAUGGGAGGUGUUGGGAA | Translation |
|      | osa2118e | Bradi4g14697.1 | 1.5 | 1 | 22 | 536  | 557  | UUCCGAUGCCUCCAUUGCCUA | UGGGCAUGGGAGGUGUUGGGAA | Cleavage    |
|      | osa2118e | Bradi4g14697.1 | 3.0 | 1 | 22 | 536  | 557  | UUCCGAUGCCUCCAUUCCUA  | UGGGCAUGGGAGGUGUUGGGAA | Cleavage    |
|      | osa2118e | Bradi4g14697.1 | 1.0 | 1 | 22 | 536  | 557  | UUCCAAUGCCUCCAUUGCCUA | UGGGCAUGGGAGGUGUUGGGAA | Translation |
|      | osa2118e | Bradi5g01936.1 | 2.5 | 1 | 22 | 674  | 695  | UUCCAAUGCCUCCAUUGCCUA | UUGGUAAUGGAGGAAUUGGGAA | Cleavage    |
|      | osa2118e | Bradi5g01936.1 | 3.0 | 1 | 22 | 674  | 695  | UUCCGAUGCCUCCAUUGCCUA | UUGGUAAUGGAGGAAUUGGGAA | Cleavage    |
|      | osa2118e | Bradi5g01936.1 | 2.5 | 1 | 22 | 674  | 695  | UUCCAAUGCCUCCAUUGCCUA | UUGGUAAUGGAGGAAUUGGGAA | Cleavage    |
|      | osa2118e | Bradi5g03110.1 | 3.0 | 1 | 20 | 598  | 616  | UUCUGAUGCCUCCAUUGCC   | GGCAUGGGAGGC-UUGGGAA   | Cleavage    |
|      | osa2118e | Bradi5g03110.1 | 2.0 | 1 | 20 | 598  | 616  | UUCCAAUGCCUCCAUUGCC   | GGCAUGGGAGGC-UUGGGAA   | Cleavage    |

|      |          |                   |     |   |    |     |     |                       |                        |             |
|------|----------|-------------------|-----|---|----|-----|-----|-----------------------|------------------------|-------------|
|      | osa2118e | Bradi5g03110.1    | 2.5 | 1 | 20 | 598 | 616 | UUCCCGAUGCCUCCAUGCC   | GGCAUGGGAGGC-UUGGGAA   | Cleavage    |
|      | osa2118e | Bradi5g03110.1    | 2.0 | 1 | 20 | 598 | 616 | UUCCCAAUGCCUCCAUGCC   | GGCAUGGGAGGC-UUGGGAA   | Cleavage    |
|      | osa2118e | CAJX010010925.1-1 | 2.5 | 1 | 21 | 873 | 893 | UUCUCGAUGCCUCCAUUCCU  | AGGGAUGGGAGGCAUCGGUAA  | Cleavage    |
|      | osa2118e | CAJX010010925.1-1 | 2.0 | 1 | 21 | 873 | 893 | UUCCCGAUGCCUCCAUUCCU  | AGGGAUGGGAGGCAUCGGUAA  | Cleavage    |
|      | osa2118f | CAJX010010925.1-1 | 2.5 | 1 | 21 | 873 | 893 | UUCCCGAUGCCUCCAUUCCU  | AGGGAUGGGAGGCAUCGGUAA  | Cleavage    |
|      | osa2118f | CAJX010010925.1-1 | 3.0 | 1 | 21 | 873 | 893 | UUCUUGAUGCCUCCAUGCCU  | AGGGAUGGGAGGCAUCGGUAA  | Cleavage    |
|      | osa2118f | CAJX010010925.1-1 | 2.5 | 1 | 21 | 873 | 893 | UUCCUGAUGCCUCCAUUCCU  | AGGGAUGGGAGGCAUCGGUAA  | Cleavage    |
|      | osa2118f | CAJX010010925.1-1 | 3.0 | 1 | 21 | 873 | 893 | UUCUUGAUGCCUCCAUUCCU  | AGGGAUGGGAGGCAUCGGUAA  | Cleavage    |
|      | osa2118f | CAJX010010925.1-1 | 2.5 | 1 | 21 | 873 | 893 | UUCCUGAUGCCUCCAUUCCU  | AGGGAUGGGAGGCAUCGGUAA  | Cleavage    |
|      | osa2118f | CAJX010010925.1-1 | 3.0 | 1 | 21 | 873 | 893 | UUCCUGAUGCCUCCAUUCCU  | AGGGAUGGGAGGCAUCGGUAA  | Cleavage    |
|      | osa2118f | CAJX010010925.1-1 | 2.5 | 1 | 21 | 873 | 893 | UUCCCGAUGCCUCCAUGCCU  | AGGGAUGGGAGGCAUCGGUAA  | Translation |
|      | osa2118f | CAJX010010925.1-1 | 2.5 | 1 | 21 | 873 | 893 | UUCCCGAUGCCUCCAUUCCU  | AGGGAUGGGAGGCAUCGGUAA  | Translation |
| 139* | osa2118f | CAJX010010925.1-2 | 2.5 | 1 | 21 | 585 | 605 | UUCUCGAUGCCUCCAUUCCU  | AGGAAUGGGAGGCAUUGGUAA  | Cleavage    |
|      | osa2118f | CAJX010010925.1-2 | 2.0 | 1 | 21 | 585 | 605 | UUCCCGAUGCCUCCAUUCCU  | AGGAAUGGGAGGCAUUGGUAA  | Cleavage    |
|      | osa2118f | CAJX010010925.1-2 | 2.5 | 1 | 21 | 585 | 605 | UUCCCGAUGCCUCCAUUCCU  | AGGAAUGGGAGGCAUUGGUAA  | Cleavage    |
|      | osa2118f | CAJX010010925.1-2 | 2.5 | 1 | 21 | 585 | 605 | UUCCCAAUGCCUCCAUGCCU  | AGGAAUGGGAGGCAUUGGUAA  | Cleavage    |
|      | osa2118f | CAJX010010925.1-2 | 2.5 | 1 | 21 | 585 | 605 | UUCUUGAUGCCUCCAUUCCU  | AGGAAUGGGAGGCAUUGGUAA  | Cleavage    |
|      | osa2118f | CAJX010010925.1-2 | 2.0 | 1 | 21 | 585 | 605 | UUCCUAAUGCCUCCAUUCCU  | AGGAAUGGGAGGCAUUGGUAA  | Cleavage    |
|      | osa2118f | CAJX010010925.1-2 | 3.0 | 1 | 21 | 585 | 605 | UUCUUGAUGCCUCCAUUCCU  | AGGAAUGGGAGGCAUUGGUAA  | Cleavage    |
|      | osa2118f | CAJX010010925.1-2 | 2.5 | 1 | 21 | 585 | 605 | UUCCUAGUGCCUCCAUUCCU  | AGGAAUGGGAGGCAUUGGUAA  | Cleavage    |
|      | osa2118f | CAJX010010925.1-2 | 2.5 | 1 | 21 | 585 | 605 | UUCUUGAUGCCUCCAUUCCU  | AGGAAUGGGAGGCAUUGGUAA  | Cleavage    |
|      | osa2118f | CAJX010010925.1-2 | 3.0 | 1 | 21 | 585 | 605 | UUCUUGAUGCCUCCAUUCCU  | AGGAAUGGGAGGCAUUGGUAA  | Cleavage    |
|      | osa2118f | CAJX010010925.1-2 | 2.5 | 1 | 21 | 585 | 605 | UUCCUAAUGCUCCAUUCCU   | AGGAAUGGGAGGCAUUGGUAA  | Cleavage    |
|      | osa2118f | CAJX010010925.1-2 | 2.5 | 1 | 21 | 585 | 605 | UUCUUGAUGCCUCCAUUCCU  | AGGAAUGGGAGGCAUUGGUAA  | Translation |
|      | osa2118g | CAJX010010925.1-2 | 2.0 | 1 | 21 | 585 | 605 | UUCCCGAUGCCUCCAUUCCU  | AGGAAUGGGAGGCAUUGGUAA  | Cleavage    |
|      | osa2118g | CAJX010010925.1-2 | 3.0 | 1 | 21 | 585 | 605 | UUCCCGAUGCCUCCAUGCCU  | AGGAAUGGGAGGCAUUGGUAA  | Cleavage    |
|      | osa2118g | CAJX010010925.1-2 | 2.5 | 1 | 21 | 585 | 605 | UUCCCGAUGCCUCCAUUCCU  | AGGAAUGGGAGGCAUUGGUAA  | Cleavage    |
|      | osa2118g | CAJX010010925.1-2 | 2.5 | 1 | 21 | 585 | 605 | UUCCCAAUGCCUCCAUGCCU  | AGGAAUGGGAGGCAUUGGUAA  | Cleavage    |
|      | osa2118g | CAJX010058741.1-1 | 3.0 | 1 | 22 | 614 | 635 | UUCCCGAUGCCUCCAUUCCUA | UUGGAAUGGGAGGCCUUGGCAA | Translation |
|      | osa2118g | CAJX010058741.1-1 | 3.0 | 1 | 22 | 614 | 635 | UUCCUAAUGCCUCCAUUCCUA | UUGGAAUGGGAGGCCUUGGCAA | Cleavage    |
|      | osa2118g | CAJX010058741.1-1 | 3.0 | 1 | 22 | 614 | 635 | UUCCCGAUGCCUCCAUUCCUA | UUGGAAUGGGAGGCCUUGGCAA | Cleavage    |
|      | osa2118g | CAJX010058912.1-1 | 3.0 | 1 | 20 | 580 | 599 | UUCCCGAUGCCUCCAUUCC   | ACAUGGGAGGUUUUGGGAA    | Cleavage    |
|      | osa2118g | CAJX010058912.1-1 | 3.0 | 1 | 20 | 580 | 599 | UUCCUAAUGCCUCCAUUCC   | ACAUGGGAGGUUUUGGGAA    | Cleavage    |
|      | osa2118g | CAJX010058912.1-1 | 3.0 | 1 | 20 | 580 | 599 | UUCCCGAUGCCUCCAUUCC   | ACAUGGGAGGUUUUGGGAA    | Cleavage    |
|      | osa2118g | CAJX010075181.1-1 | 3.0 | 1 | 21 | 597 | 617 | UUCUCGAUGCCUCCAUUCCU  | GGGUAUGGGUGGUUUCGGGAA  | Cleavage    |
| 140* | osa2118g | CAJX010075181.1-1 | 2.5 | 1 | 21 | 597 | 617 | UUCCCGAUGCCUCCAUUCCU  | GGGUAUGGGUGGUUUCGGGAA  | Translation |
|      | osa2118g | CAJX010075181.1-1 | 3.0 | 1 | 21 | 597 | 617 | UUCCCGAUGCCUCCAUUCCU  | GGGUAUGGGUGGUUUCGGGAA  | Cleavage    |
|      | osa2118g | CAJX010075181.1-1 | 2.5 | 1 | 21 | 597 | 617 | UUCUUGAUGCCUCCAUGCCU  | GGGUAUGGGUGGUUUCGGGAA  | Cleavage    |
|      | osa2118g | CAJX010075181.1-1 | 3.0 | 1 | 21 | 597 | 617 | UUCCUGAUGCCUCCAUUCCU  | GGGUAUGGGUGGUUUCGGGAA  | Cleavage    |
|      | osa2118g | CAJX010075181.1-1 | 3.0 | 1 | 21 | 597 | 617 | UUCCUGAUGCCUCCAUUCCU  | GGGUAUGGGUGGUUUCGGGAA  | Cleavage    |
|      | osa2118g | CAJX010075181.1-1 | 3.0 | 1 | 21 | 597 | 617 | UUCCUGAUGCCUCCAUUCCU  | GGGUAUGGGUGGUUUCGGGAA  | Translation |
|      | osa2118g | CAJX010075181.1-1 | 2.5 | 1 | 21 | 597 | 617 | UUCCCGAUGCCUCCAUUCCU  | GGGUAUGGGUGGUUUCGGGAA  | Cleavage    |
|      | osa2118g | CAJX010075181.1-1 | 2.0 | 1 | 21 | 597 | 617 | UUCCCGAUGCCUCCAUGCCU  | GGGUAUGGGUGGUUUCGGGAA  | Translation |
|      | osa2118g | CAJX010075181.1-1 | 3.0 | 1 | 21 | 597 | 617 | UUCCCGAUGCCUCCAUUCCU  | GGGUAUGGGUGGUUUCGGGAA  | Translation |
|      | osa2118g | CAJX010086000.1-1 | 3.0 | 1 | 22 | 485 | 506 | UUCCCGAUGCCUCCAUUCCUA | UUGGAAUGGGAGGCCUUGGUAA | Cleavage    |

|      |          |                   |     |   |    |      |      |                        |                        |             |
|------|----------|-------------------|-----|---|----|------|------|------------------------|------------------------|-------------|
|      | osa2118g | CAJX010086000.1-1 | 3.0 | 1 | 22 | 485  | 506  | UUCCUAAUGCCUCCAUUCCUA  | UUGGAAUGGGAGGCCUUGGUAA | Cleavage    |
|      | osa2118g | CAJX010086000.1-1 | 3.0 | 1 | 22 | 485  | 506  | UUCCCGAUGCCUCCAUUCCUA  | UUGGAAUGGGAGGCCUUGGUAA | Cleavage    |
|      | osa2118g | CAJX010850960.1-1 | 2.5 | 1 | 21 | 111  | 131  | UUCCCAAUGCCUCCAUUGCCU  | GGGCAUGGGUGGCAUUGGAAA  | Cleavage    |
|      | osa2118h | CAJX010850960.1-1 | 3.0 | 1 | 21 | 111  | 131  | UUCCCGAUGCCUCCAUUGCCU  | GGGCAUGGGUGGCAUUGGAAA  | Cleavage    |
|      | osa2118h | CAJX010850960.1-1 | 2.5 | 1 | 21 | 111  | 131  | UUCCCAAUGCCUCCAUUGCCU  | GGGCAUGGGUGGCAUUGGAAA  | Cleavage    |
|      | osa2118h | CAJX010853167.1-1 | 3.0 | 1 | 21 | 144  | 164  | UUCCCGAUGCCUCCAUUCCU   | GGGAAUGGGUGGUCUUGGGAA  | Cleavage    |
|      | osa2118h | CAJX010853167.1-1 | 3.0 | 1 | 21 | 144  | 164  | UUCCUAAUGCCUCCAUUCCU   | GGGAAUGGGUGGUCUUGGGAA  | Cleavage    |
|      | osa2118h | CAJX010853167.1-1 | 3.0 | 1 | 21 | 144  | 164  | UUCCGAUGCCUCCAUUCCU    | GGGAAUGGGUGGUCUUGGGAA  | Cleavage    |
| 141* | osa2118h | CAJX010864692.1-1 | 3.0 | 1 | 21 | 597  | 617  | UUCUCGAUGCCUCCAUUCCU   | GGGUAUGGGUGGUUUCGGGAA  | Cleavage    |
|      | osa2118h | CAJX010864692.1-1 | 2.5 | 1 | 21 | 597  | 617  | UUCCCGAUGCCUCCAUUCCU   | GGGUAUGGGUGGUUUCGGGAA  | Translation |
|      | osa2118h | CAJX010864692.1-1 | 3.0 | 1 | 21 | 597  | 617  | UUCCCGAUGCCUCCAUUCCU   | GGGUAUGGGUGGUUUCGGGAA  | Cleavage    |
|      | osa2118h | CAJX010864692.1-1 | 2.5 | 1 | 21 | 597  | 617  | UUCUGAUGCCUCCAUUGCCU   | GGGUAUGGGUGGUUUCGGGAA  | Cleavage    |
|      | osa2118h | CAJX010864692.1-1 | 3.0 | 1 | 21 | 597  | 617  | UUCUGAUGCCUCCAUUCCU    | GGGUAUGGGUGGUUUCGGGAA  | Cleavage    |
|      | osa2118h | CAJX010864692.1-1 | 3.0 | 1 | 21 | 597  | 617  | UUCUGAUGCCUCCAUUCCU    | GGGUAUGGGUGGUUUCGGGAA  | Cleavage    |
|      | osa2118i | CAJX010864692.1-1 | 3.0 | 1 | 21 | 597  | 617  | UUCUGAUGCCUCCAUUCCU    | GGGUAUGGGUGGUUUCGGGAA  | Cleavage    |
|      | osa2118i | CAJX010864692.1-1 | 2.5 | 1 | 21 | 597  | 617  | UUCCCGAUGCCUCCAUUCCU   | GGGUAUGGGUGGUUUCGGGAA  | Cleavage    |
|      | osa2118i | CAJX010864692.1-1 | 2.0 | 1 | 21 | 597  | 617  | UUCCCGAUGCCUCCAUUGCCU  | GGGUAUGGGUGGUUUCGGGAA  | Cleavage    |
|      | osa2118i | CAJX010864692.1-1 | 3.0 | 1 | 21 | 597  | 617  | UUCCCGAUGCCUCCAUUCCU   | GGGUAUGGGUGGUUUCGGGAA  | Cleavage    |
|      | osa2118i | CAJX010867599.1-1 | 3.0 | 1 | 21 | 1368 | 1388 | UUCCCGAUGCCUCCAUUCCU   | GGGAAUGGGUGGUCUUGGGAA  | Translation |
| 142* | osa2118i | CAJX010867599.1-1 | 3.0 | 1 | 21 | 1368 | 1388 | UUCCUAAUGCCUCCAUUCCU   | GGGAAUGGGUGGUCUUGGGAA  | Cleavage    |
|      | osa2118i | CAJX010867599.1-1 | 3.0 | 1 | 21 | 1368 | 1388 | UUCCCGAUGCCUCCAUUCCU   | GGGAAUGGGUGGUCUUGGGAA  | Cleavage    |
|      | osa2118i | CALP010002291.1-1 | 2.5 | 1 | 22 | 754  | 775  | UUCCCAAUGCCUCCAUUGCCUA | UAGGCAUUGGAGGAGUUGGGAA | Cleavage    |
|      | osa2118i | CALP010002291.1-1 | 3.0 | 1 | 22 | 754  | 775  | UUCCCGAUGCCUCCAUUGCCUA | UAGGCAUUGGAGGAGUUGGGAA | Cleavage    |
|      | osa2118i | CALP010002291.1-1 | 2.5 | 1 | 22 | 754  | 775  | UUCCCAAUGCCUCCAUUGCCUA | UAGGCAUUGGAGGAGUUGGGAA | Cleavage    |
|      | osa2118i | CALP010009046.1-1 | 2.5 | 1 | 20 | 1455 | 1474 | UUCUCGAUGCCUCCAUUCC    | GGAAUGGGAGGUCUUGGGAA   | Cleavage    |
|      | osa2118i | CALP010009046.1-1 | 2.0 | 1 | 20 | 1455 | 1474 | UUCCCGAUGCCUCCAUUCC    | GGAAUGGGAGGUCUUGGGAA   | Translation |
|      | osa2118j | CALP010009046.1-1 | 2.5 | 1 | 20 | 1455 | 1474 | UUCCCGAUGCCUCCAUUCC    | GGAAUGGGAGGUCUUGGGAA   | Cleavage    |
|      | osa2118j | CALP010009046.1-1 | 2.5 | 1 | 20 | 1455 | 1474 | UUCCCAAUGCCUCCAUUGCC   | GGAAUGGGAGGUCUUGGGAA   | Cleavage    |
|      | osa2118j | CALP010009046.1-1 | 2.5 | 1 | 20 | 1455 | 1474 | UUCUGAUGCCUCCAUUCC     | GGAAUGGGAGGUCUUGGGAA   | Cleavage    |
|      | osa2118j | CALP010009046.1-1 | 2.0 | 1 | 20 | 1455 | 1474 | UUCCUAAUGCCUCCAUUCC    | GGAAUGGGAGGUCUUGGGAA   | Cleavage    |
|      | osa2118j | CALP010009046.1-1 | 3.0 | 1 | 20 | 1455 | 1474 | UUCUGAUGCCUCUCAUUCC    | GGAAUGGGAGGUCUUGGGAA   | Cleavage    |
|      | osa2118j | CALP010009046.1-1 | 2.5 | 1 | 20 | 1455 | 1474 | UUCCUAGUGCCUCCAUUCC    | GGAAUGGGAGGUCUUGGGAA   | Cleavage    |
|      | osa2118j | CALP010009046.1-1 | 2.5 | 1 | 20 | 1455 | 1474 | UUCUGAUGCCUCCAUUCC     | GGAAUGGGAGGUCUUGGGAA   | Cleavage    |
|      | osa2118j | CALP010009046.1-1 | 3.0 | 1 | 20 | 1455 | 1474 | UUCUGAUGCCUCUCAUUCC    | GGAAUGGGAGGUCUUGGGAA   | Cleavage    |
|      | osa2118j | CALP010009046.1-1 | 2.5 | 1 | 20 | 1455 | 1474 | UUCCUAAUGCCUCCAUUCC    | GGAAUGGGAGGUCUUGGGAA   | Translation |
|      | osa2118j | CALP010009046.1-1 | 2.5 | 1 | 20 | 1455 | 1474 | UUCUGAUGCCUCCAUUCC     | GGAAUGGGAGGUCUUGGGAA   | Translation |
| 143* | osa2118j | CALP010009046.1-1 | 2.0 | 1 | 20 | 1455 | 1474 | UUCCCGAUGCCUCCAUUCC    | GGAAUGGGAGGUCUUGGGAA   | Cleavage    |
|      | osa2118j | CALP010009046.1-1 | 3.0 | 1 | 20 | 1455 | 1474 | UUCCCGAUGCCUCCAUUGCC   | GGAAUGGGAGGUCUUGGGAA   | Cleavage    |
|      | osa2118j | CALP010009046.1-1 | 2.5 | 1 | 20 | 1455 | 1474 | UUCCCGAUGCCUCCAUUCC    | GGAAUGGGAGGUCUUGGGAA   | Cleavage    |
|      | osa2118j | CALP010009046.1-1 | 2.5 | 1 | 20 | 1455 | 1474 | UUCCCAAUGCCUCCAUUGCC   | GGAAUGGGAGGUCUUGGGAA   | Cleavage    |
|      | osa2118j | CALP010019386.1-1 | 3.0 | 1 | 22 | 1218 | 1239 | UUCCCGAUGCCUCCAUUGCCUA | UAGGCAUUGCAGGUGUCGGGAA | Cleavage    |
|      | osa2118j | CALP010020261.1-1 | 3.0 | 1 | 21 | 566  | 586  | UUCCCGAUGCCUCCAUUCCU   | GGGAAUGGCUGGAAUCGGGAA  | Cleavage    |
|      | osa2118j | CALP010020261.1-1 | 3.0 | 1 | 21 | 566  | 586  | UUCCCGAUGCCUCCAUUCCU   | GGGAAUGGCUGGAAUCGGGAA  | Cleavage    |
|      | osa2118j | CALP010023647.1-1 | 3.0 | 1 | 21 | 1266 | 1286 | CUCCUGAUGCCUCCAAAGCCU  | AGGUUCGGGAGGCAUGAGGAG  | Cleavage    |
|      | osa2118j | CALP010032206.1-1 | 3.0 | 1 | 22 | 1584 | 1605 | UUCUGAUGCCUCCAUUGCCUA  | UAGGCAUCGGAGGAAUUGGGAA | Cleavage    |
|      | osa2118j | CALP010032206.1-1 | 2.0 | 1 | 22 | 1584 | 1605 | UUCCCAAUGCCUCCAUUGCCUA | UAGGCAUCGGAGGAAUUGGGAA | Cleavage    |
|      | osa2118j | CALP010032206.1-1 | 2.5 | 1 | 22 | 1584 | 1605 | UUCCCGAUGCCUCCAUUGCCUA | UAGGCAUCGGAGGAAUUGGGAA | Cleavage    |

|      |          |                   |     |   |    |      |      |                       |                        |             |
|------|----------|-------------------|-----|---|----|------|------|-----------------------|------------------------|-------------|
|      | osa2118j | CALP010032206.1-1 | 2.0 | 1 | 22 | 1584 | 1605 | UUCCCAAUGCCUCCAUGCCUA | UAGGCAUCGGAGGAAUUGGGAA | Translation |
|      | osa2118k | CALP010039172.1-1 | 3.0 | 1 | 21 | 596  | 616  | UUCCCGAUGCCUCCAUGCCU  | GGGUAUGGGUGGCAUCGGAAA  | Cleavage    |
|      | osa2118k | CALP010125674.1-1 | 3.0 | 1 | 22 | 612  | 633  | UUCUCGAUGCCUCCAUUCCUA | UCGGAAUGGGUGGUGUUGGGAA | Cleavage    |
|      | osa2118k | CALP010125674.1-1 | 2.5 | 1 | 22 | 612  | 633  | UUCCCGAUGCCUCCAUUCCUA | UCGGAAUGGGUGGUGUUGGGAA | Cleavage    |
|      | osa2118k | CALP010125674.1-1 | 3.0 | 1 | 22 | 612  | 633  | UUCCCGAUGCCUCCAUUCCUA | UCGGAAUGGGUGGUGUUGGGAA | Cleavage    |
| 144* | osa2118k | CALP010125674.1-1 | 3.0 | 1 | 22 | 612  | 633  | UUCCCAAUGCCUCCAUGCCUA | UCGGAAUGGGUGGUGUUGGGAA | Cleavage    |
|      | osa2118k | CALP010125674.1-1 | 2.5 | 1 | 22 | 612  | 633  | UUCCUAAUGCCUCCAUUCCUA | UCGGAAUGGGUGGUGUUGGGAA | Translation |
|      | osa2118k | CALP010125674.1-1 | 3.0 | 1 | 22 | 612  | 633  | UUCCUAGUGCCUCCAUUCCUA | UCGGAAUGGGUGGUGUUGGGAA | Cleavage    |
|      | osa2118k | CALP010125674.1-1 | 3.0 | 1 | 22 | 612  | 633  | UUCUGAUGCCUCCAUUCCUA  | UCGGAAUGGGUGGUGUUGGGAA | Cleavage    |
|      | osa2118k | CALP010125674.1-1 | 3.0 | 1 | 22 | 612  | 633  | UUCUAAUGCUUCCAUUCCUA  | UCGGAAUGGGUGGUGUUGGGAA | Cleavage    |
|      | osa2118k | CALP010125674.1-1 | 3.0 | 1 | 22 | 612  | 633  | UUCUGAUGCCUCCAUUCCUA  | UCGGAAUGGGUGGUGUUGGGAA | Cleavage    |
|      | osa2118l | CALP010125674.1-1 | 2.5 | 1 | 22 | 612  | 633  | UUCCCGAUGCCUCCAUUCCUA | UCGGAAUGGGUGGUGUUGGGAA | Cleavage    |
|      | osa2118l | CALP010125674.1-1 | 3.0 | 1 | 22 | 612  | 633  | UUCCCGAUGCCUCCAUUCCUA | UCGGAAUGGGUGGUGUUGGGAA | Cleavage    |
|      | osa2118l | CALP010125674.1-1 | 3.0 | 1 | 22 | 612  | 633  | UUCCCAAUGCCUCCAUGCCUA | UCGGAAUGGGUGGUGUUGGGAA | Cleavage    |
|      | osa2118l | CALP010183577.1-1 | 3.0 | 1 | 20 | 607  | 626  | UUCCCGAUGCCUCCAUUCC   | GGCAUGGGAGGGCUCGGGAA   | Translation |
|      | osa2118l | CALP010183577.1-1 | 2.5 | 1 | 20 | 607  | 626  | UUCUGAUGCCUCCAUGCC    | GGCAUGGGAGGGCUCGGGAA   | Cleavage    |
| 145* | osa2118l | CALP010183577.1-1 | 3.0 | 1 | 20 | 607  | 626  | UUCCCGAUGCCUCCAUUCC   | GGCAUGGGAGGGCUCGGGAA   | Cleavage    |
|      | osa2118l | CALP010183577.1-1 | 2.0 | 1 | 20 | 607  | 626  | UUCCCGAUGCCUCCAUGCC   | GGCAUGGGAGGGCUCGGGAA   | Cleavage    |
|      | osa2118l | CALP010300106.1-1 | 3.0 | 1 | 21 | 249  | 269  | UUCCCAAUGCCUCCAUGCCU  | GGGCUUGGGAGGCAUUGGAAG  | Cleavage    |
|      | osa2118l | CALP010300106.1-1 | 2.5 | 1 | 21 | 249  | 269  | CUCCUGAUGCCUCCAAGCCU  | GGGCUUGGGAGGCAUUGGAAG  | Cleavage    |
|      | osa2118l | CALP010300106.1-1 | 3.0 | 1 | 21 | 249  | 269  | UUCCCAAUGCCUCCAUGCCU  | GGGCUUGGGAGGCAUUGGAAG  | Cleavage    |
|      | osa2118l | CALP010358028.1-1 | 3.0 | 1 | 22 | 359  | 380  | UUCUGAUGCCUCCAUGCCUA  | UAGGCAUCGGAGGAAUUGGGAA | Cleavage    |
|      | osa2118m | CALP010358028.1-1 | 2.0 | 1 | 22 | 359  | 380  | UUCCCAAUGCCUCCAUGCCUA | UAGGCAUCGGAGGAAUUGGGAA | Cleavage    |
|      | osa2118m | CALP010358028.1-1 | 2.5 | 1 | 22 | 359  | 380  | UUCCCGAUGCCUCCAUGCCUA | UAGGCAUCGGAGGAAUUGGGAA | Cleavage    |
|      | osa2118m | CALP010358028.1-1 | 2.0 | 1 | 22 | 359  | 380  | UUCCCAAUGCCUCCAUGCCUA | UAGGCAUCGGAGGAAUUGGGAA | Cleavage    |
|      | osa2118m | CALP010549559.1-1 | 2.5 | 1 | 22 | 392  | 413  | UUCCCAAUGCCUCCAUGCCUA | UUGGUAUGGGAGGUAUUGGCAA | Cleavage    |
|      | osa2118m | CALP010549559.1-1 | 3.0 | 1 | 22 | 392  | 413  | UUCCCGAUGCCUCCAUGCCUA | UUGGUAUGGGAGGUAUUGGCAA | Cleavage    |
|      | osa2118m | CALP010549559.1-1 | 2.5 | 1 | 22 | 392  | 413  | UUCCCAAUGCCUCCAUGCCUA | UUGGUAUGGGAGGUAUUGGCAA | Cleavage    |
|      | osa2118m | CALP010631233.1-1 | 3.0 | 1 | 22 | 206  | 227  | UUCUGAUGCCUCCAUGCCUA  | UUGGCAUGGGAGGUGUCGGAAA | Cleavage    |
|      | osa2118m | CALP010631233.1-1 | 2.5 | 1 | 22 | 206  | 227  | UUCCCGAUGCCUCCAUGCCUA | UUGGCAUGGGAGGUGUCGGAAA | Cleavage    |
|      | osa2118m | LOC_Os01g05600.1  | 2.5 | 1 | 21 | 585  | 605  | UUCUCGAUGCCUCCAUUCCU  | GGGGAUGGGAGGCAUCGGUAA  | Translation |
|      | osa2118m | LOC_Os01g05600.1  | 2.0 | 1 | 21 | 585  | 605  | UUCCCGAUGCCUCCAUUCCU  | GGGGAUGGGAGGCAUCGGUAA  | Translation |
| 146* | osa2118m | LOC_Os01g05600.1  | 2.5 | 1 | 21 | 585  | 605  | UUCCCGAUGCCUCCAUUCCU  | GGGGAUGGGAGGCAUCGGUAA  | Cleavage    |
|      | osa2118m | LOC_Os01g05600.1  | 3.0 | 1 | 21 | 585  | 605  | UUCUGAUGCCUCCAUGCCU   | GGGGAUGGGAGGCAUCGGUAA  | Cleavage    |
|      | osa2118m | LOC_Os01g05600.1  | 2.5 | 1 | 21 | 585  | 605  | UUCUGAUGCCUCCAUUCCU   | GGGGAUGGGAGGCAUCGGUAA  | Cleavage    |
|      | osa2118m | LOC_Os01g05600.1  | 3.0 | 1 | 21 | 585  | 605  | UUCUGAUGCCUCCAUUCCU   | GGGGAUGGGAGGCAUCGGUAA  | Cleavage    |
|      | osa2118m | LOC_Os01g05600.1  | 2.5 | 1 | 21 | 585  | 605  | UUCUGAUGCCUCCAUUCCU   | GGGGAUGGGAGGCAUCGGUAA  | Cleavage    |
|      | osa2118m | LOC_Os01g05600.1  | 2.0 | 1 | 21 | 585  | 605  | UUCCCGAUGCCUCCAUUCCU  | GGGGAUGGGAGGCAUCGGUAA  | Cleavage    |
|      | osa2118m | LOC_Os01g05600.1  | 2.5 | 1 | 21 | 585  | 605  | UUCCCGAUGCCUCCAUUCCU  | GGGGAUGGGAGGCAUCGGUAA  | Cleavage    |
|      | osa2118m | LOC_Os01g05600.1  | 2.5 | 1 | 21 | 585  | 605  | UUCCCGAUGCCUCCAUUCCU  | GGGGAUGGGAGGCAUCGGUAA  | Cleavage    |
|      | osa2118m | LOC_Os01g05620.1  | 2.5 | 1 | 21 | 588  | 608  | UUCUCGAUGCCUCCAUUCCU  | GGGGAUGGGAGGCAUCGGUAA  | Cleavage    |
|      | osa2118m | LOC_Os01g05620.1  | 2.0 | 1 | 21 | 588  | 608  | UUCCCGAUGCCUCCAUUCCU  | GGGGAUGGGAGGCAUCGGUAA  | Translation |
|      | osa2118n | LOC_Os01g05620.1  | 2.5 | 1 | 21 | 588  | 608  | UUCCCGAUGCCUCCAUUCCU  | GGGGAUGGGAGGCAUCGGUAA  | Cleavage    |
|      | osa2118n | LOC_Os01g05620.1  | 3.0 | 1 | 21 | 588  | 608  | UUCUGAUGCCUCCAUGCCU   | GGGGAUGGGAGGCAUCGGUAA  | Cleavage    |





|      |                |                   |     |   |    |      |      |                        |                        |             |
|------|----------------|-------------------|-----|---|----|------|------|------------------------|------------------------|-------------|
|      | osa2118r       | LOC_Os09g11020.1  | 3.0 | 1 | 20 | 1006 | 1025 | UUCCUAAUGCCUCCAUUCC    | GGAAUGGGAGGGAUUGGUAA   | Translation |
|      | osa2118r       | LOC_Os09g11020.1  | 3.0 | 1 | 20 | 1006 | 1025 | UUCCCGAUGCCUCCAUUCC    | GGAAUGGGAGGGAUUGGUAA   | Translation |
|      | osa2118r       | LOC_Os09g14010.1  | 3.0 | 1 | 21 | 507  | 527  | UUCCCGAUGCCUCCAUUCCU   | GGGAAUGGGUGGAGUUGGGAA  | Cleavage    |
|      | osa2118r       | LOC_Os09g14010.1  | 3.0 | 1 | 21 | 507  | 527  | UUCCUAAUGCCUCCAUUCCU   | GGGAAUGGGUGGAGUUGGGAA  | Cleavage    |
|      | osa2118r       | LOC_Os09g14010.1  | 3.0 | 1 | 21 | 507  | 527  | UUCCCGAUGCCUCCAUUCCU   | GGGAAUGGGUGGAGUUGGGAA  | Translation |
|      | osa2118r       | LOC_Os09g14060.1  | 3.0 | 1 | 21 | 552  | 572  | UUCCCGAUGCCUCCAUUCCU   | GGGAAUGGGUGGAGUUGGGAA  | Cleavage    |
|      | osa2118r       | LOC_Os09g14060.1  | 3.0 | 1 | 21 | 552  | 572  | UUCCUAAUGCCUCCAUUCCU   | GGGAAUGGGUGGAGUUGGGAA  | Cleavage    |
|      | osa2118r       | LOC_Os09g14060.1  | 3.0 | 1 | 21 | 552  | 572  | UUCCCGAUGCCUCCAUUCCU   | GGGAAUGGGUGGAGUUGGGAA  | Cleavage    |
|      | osa2118r       | LOC_Os09g30220.1  | 3.0 | 1 | 21 | 636  | 656  | UUCCUAAUGCCUCCAUUCCU   | GGGCAUGGGUGGCCUUGGGAA  | Cleavage    |
|      | osa2118r       | LOC_Os09g30220.1  | 2.0 | 1 | 21 | 636  | 656  | UUCCCAAUGCCUCCAUUGCCU  | GGGCAUGGGUGGCCUUGGGAA  | Cleavage    |
|      | osa2118r       | LOC_Os09g30220.1  | 2.5 | 1 | 21 | 636  | 656  | UUCCCGAUGCCUCCAUUGCCU  | GGGCAUGGGUGGCCUUGGGAA  | Cleavage    |
|      | osa2118r       | LOC_Os09g30220.1  | 2.0 | 1 | 21 | 636  | 656  | UUCCCAAUGCCUCCAUUGCCU  | GGGCAUGGGUGGCCUUGGGAA  | Cleavage    |
| 151* | osa2118r       | LOC_Os10g04674.1  | 2.5 | 1 | 20 | 613  | 632  | UUCCCAAUGCCUCCAUUGCC   | GGCAUGGGAGGCCUUGGUAA   | Cleavage    |
|      | osa2118r       | LOC_Os10g04674.1  | 3.0 | 1 | 20 | 613  | 632  | UUCCCGAUGCCUCCAUUGCC   | GGCAUGGGAGGCCUUGGUAA   | Cleavage    |
|      | osa2118r       | LOC_Os10g04674.1  | 2.5 | 1 | 20 | 613  | 632  | UUCCCAAUGCCUCCAUUGCC   | GGCAUGGGAGGCCUUGGUAA   | Cleavage    |
|      | osa2118r       | LOC_Os10g07400.1  | 3.0 | 1 | 22 | 608  | 629  | UUCCCGAUGCCUCCAUUCCUA  | UUGGGCUUGGAGGCAUUGGGAA | Cleavage    |
|      | osa2118r       | LOC_Os10g07400.1  | 3.0 | 1 | 22 | 608  | 629  | UUCCCGAUGCCUCCAUUCCUA  | UUGGGCUUGGAGGCAUUGGGAA | Translation |
|      | osa2118r       | LOC_Os10g07400.1  | 3.0 | 1 | 22 | 609  | 629  | UUCCCAAUGCCUCCAUUGCCUA | UGGGCUUGG-AGGCAUUGGGAA | Cleavage    |
|      | osa2118r       | LOC_Os10g07400.1  | 3.0 | 1 | 22 | 608  | 629  | UUCCUAAUGCCUCCAUUCCUA  | UUGGGCUUGGAGGCAUUGGGAA | Cleavage    |
|      | osa2118r       | LOC_Os10g07400.1  | 3.0 | 1 | 22 | 608  | 629  | UUCCCGAUGCCUCCAUUCCUA  | UUGGGCUUGGAGGCAUUGGGAA | Translation |
|      | osa2118r       | LOC_Os10g07400.1  | 3.0 | 1 | 22 | 608  | 629  | UUCCCGAUGCCUCCAUUCCUA  | UUGGGCUUGGAGGCAUUGGGAA | Cleavage    |
|      | osa2118r       | LOC_Os10g07400.1  | 3.0 | 1 | 22 | 609  | 629  | UUCCCAAUGCCUCCAUUGCCUA | UGGGCUUGG-AGGCAUUGGGAA | Cleavage    |
|      | osa2118r       | LOC_Os11g11770.1  | 3.0 | 1 | 21 | 588  | 608  | UUCCCAAUGCCUCCAUUGCCU  | GGGUAUGGGUGGCAUGGGGAA  | Cleavage    |
|      | osa2118r       | LOC_Os11g11770.1  | 3.0 | 1 | 21 | 588  | 608  | UUCCCGAUGCCUCCAUUGCCU  | GGGUAUGGGUGGCAUGGGGAA  | Cleavage    |
|      | osa2118r       | LOC_Os11g11770.1  | 3.0 | 1 | 21 | 588  | 608  | UUCCCAAUGCCUCCAUUGCCU  | GGGUAUGGGUGGCAUGGGGAA  | Cleavage    |
|      | osa2118r       | LOC_Os11g29520.1  | 2.5 | 1 | 22 | 749  | 770  | UUCCCAAUGCCUCCAUUGCCUA | UUGGCAUUGGUGGUUUGGGAA  | Cleavage    |
|      | osa2118r       | LOC_Os11g29520.1  | 3.0 | 1 | 22 | 749  | 770  | UUCCCGAUGCCUCCAUUGCCUA | UUGGCAUUGGUGGUUUGGGAA  | Cleavage    |
|      | osa2118r       | LOC_Os11g29520.1  | 2.5 | 1 | 22 | 749  | 770  | UUCCCAAUGCCUCCAUUGCCUA | UUGGCAUUGGUGGUUUGGGAA  | Cleavage    |
|      | osa2118r       | LOC_Os12g31200.1  | 3.0 | 1 | 20 | 2949 | 2968 | UUCUCGAUGCCUCCAUUCC    | GGAAUGGGAGGAGGCGAGAA   | Cleavage    |
| 152  | osa2122        | Bradi4g20527.1    | 2.0 | 1 | 20 | 1013 | 1032 | UUUCAAUUUAACUUUUGU     | CCAGAAGGUUUUUUUGAAA    | Cleavage    |
| 153  | osa2275c       | CALP010197779.1-1 | 3.0 | 1 | 20 | 164  | 183  | AGAAUUGGAGGAAAACAAC    | UUAUGUUUUUCUCAAUUCU    | Cleavage    |
| 154  | osa2863a       | LOC_Os11g11920.1  | 3.0 | 1 | 20 | 420  | 439  | UUGUCCAUUCUAGUUUAGC    | GCCAAACUGGAAGGGGAUAA   | Cleavage    |
| 155  | osa2863b       | CALP010000177.1-1 | 2.5 | 1 | 21 | 3285 | 3305 | UUCGUUUUUUUGGACUAGAGU  | ACUUUGGUCCAAACAAUUGAA  | Cleavage    |
| 156  | osa2864.1      | CALP010021818.1-1 | 3.0 | 1 | 20 | 487  | 506  | UUUUGCUGCCUUGUUUUGC    | GCAAGACAACUGUAGCAAAA   | Translation |
|      | osa2864.1      | CALP010209389.1-1 | 3.0 | 1 | 20 | 152  | 171  | UUUUGCUGCCUUGUUUUGC    | GAAAGACAUGGGCGGCAAAA   | Cleavage    |
| 157  | osa2864.2      | LOC_Os02g16270.1  | 2.0 | 1 | 21 | 778  | 799  | UUGUUUUG-CAUUGUAUAGGUA | UACCUAUACAUGACAAAACAA  | Translation |
| 158  | osa2870        | LOC_Os05g34230.1  | 3.0 | 1 | 20 | 1585 | 1604 | AAUUCAGUUUGGGGAGACAA   | UUGUCUGUCUACUGAUUA     | Translation |
| 159  | osa2871a3p     | 1980407           | 3.0 | 1 | 21 | 1052 | 1072 | UAUUUUAGUUUCUAUGGUCAC  | GUGACCAUGAAAACGAAAUA   | Cleavage    |
|      | osa2871a3p     | CALP010010879.1-1 | 3.0 | 1 | 20 | 29   | 48   | UAUUUUAGUUUCUAUGGUCAC  | UGACCAUAGAAAACUGUAAUC  | Cleavage    |
|      | osa2871b       | 1980407           | 3.0 | 1 | 21 | 1052 | 1072 | UAUUUUAGUUUCUAUGGUCAC  | GUGACCAUGAAAACGAAAUA   | Cleavage    |
| 160  | osa2871b       | CALP010010879.1-1 | 3.0 | 1 | 20 | 29   | 48   | UAUUUUAGUUUCUAUGGUCAC  | UGACCAUAGAAAACUGUAAUC  | Cleavage    |
| 161  | osa2907a/b/c/d | CALP010021631.1-1 | 3.0 | 1 | 20 | 1198 | 1217 | GGCAGCCGAGCGAGGGCCUC   | GAGGUUCUCCUUUGGUGCC    | Translation |
| 162  | osa2921        | CALP010000216.1-1 | 2.5 | 1 | 20 | 1315 | 1334 | AAGAACUUAUAUAACUUUA    | UAAGGUUGUAUCAAGUUUUU   | Translation |
| 163  | osa2926        | CALP010116734.1-1 | 3.0 | 1 | 20 | 1030 | 1049 | AGGUCGUCGACGUUGGUGCU   | AGCGCCGGCGCCGAGACCU    | Translation |
| 164  | osa2927        | LOC_Os03g48320.1  | 3.0 | 1 | 20 | 2615 | 2634 | UGUCGUCGUCGAGGAGCCC    | ACGCACCAUCGACGACACA    | Cleavage    |
| 164  | osa2927        | CAJX010067045.1-1 | 3.0 | 1 | 21 | 2183 | 2203 | UGUCGUCGUCGAGGAGCCCA   | UGGGCAGCAUCGACGUAUA    | Cleavage    |
| 165  | osa395u        | LOC_Os08g20000.1  | 2.5 | 1 | 20 | 3424 | 3443 | GUGAAGCGUUUGGGGAAAU    | AUUCUCCAGAUUCUAC       | Cleavage    |



|     |             |                   |     |   |    |      |      |                        |                        |             |
|-----|-------------|-------------------|-----|---|----|------|------|------------------------|------------------------|-------------|
| 166 | osa395v     | CALP010010603.1-1 | 3.0 | 1 | 20 | 790  | 809  | GUGAAGUAUUUGGCGGAACU   | AGUCCUGUCAAGUGCUUCAC   | Cleavage    |
| 167 | osa396a/b5p | LOC_Os12g10180.1  | 3.0 | 1 | 20 | 461  | 480  | UUCCACAGCUUUUCUUGAACU  | GGUUGAGGGAAGCUGUGGAG   | Cleavage    |
| 168 | osa396c5p   | LOC_Os12g10180.1  | 3.0 | 1 | 21 | 460  | 480  | UUCCACAGCUUUUCUUGAACUU | AGGUUGAGGGAAGCUGUGGAG  | Cleavage    |
| 169 | osa396f3p   | LOC_Os08g16070.1  | 3.0 | 1 | 21 | 2294 | 2314 | AUAGUUAAGAAAGUCCUUGG   | CCAAGGAAUCCUUGAGUUAU   | Translation |
| 170 | osa397a     | CALP010010603.1-1 | 2.5 | 1 | 20 | 687  | 706  | UCAUUGAGUGCAGCGUUGAU   | AUCAUUGUUGAACUCAGUGA   | Translation |
| 171 | osa397b     | CALP010010603.1-1 | 3.0 | 1 | 20 | 687  | 706  | UUUUUGAGUGCAGCGUUGAU   | AUCAUUGUUGAACUCAGUGA   | Translation |
|     | osa399e/f/g | LOC_Os05g30220.1  | 2.5 | 1 | 21 | 1180 | 1200 | UGCCAAAGGAGAUUUGCCCAG  | CUUGGAAGAUCUCCUUUGGCA  | Cleavage    |
|     | osa399e/f/g | LOC_Os11g44960.1  | 3.0 | 1 | 21 | 1882 | 1902 | UGCCAAAGGAGAUUUGCCCAG  | UUGCGCAGACUCCUUUGGCA   | Cleavage    |
| 172 | osa399e/f/g | LOC_Os11g45050.1  | 3.0 | 1 | 21 | 1879 | 1899 | UGCCAAAGGAGAUUUGCCCAG  | UUGCGCAGACUCCUUUGGCA   | Cleavage    |
|     | osa399e/f/g | CALP010340526.1-1 | 3.0 | 1 | 21 | 1173 | 1193 | UGCCAAAGGAGAUUUGCCCAG  | CUUGGACAAUCUCCUUUGGCA  | Cleavage    |
|     | osa399e/f/g | CALP010621229.1-1 | 3.0 | 1 | 21 | 939  | 959  | UGCCAAAGGAGAUUUGCCCAG  | CUUGGACAAUCUCCUUUGGCA  | Cleavage    |
|     | osa399h     | 1983467           | 3.0 | 1 | 21 | 589  | 609  | UGCCAAAGGAGACUUGCCCAG  | UUAGGCAAGACUACUUUGGCA  | Translation |
| 173 | osa399h     | CALP010340526.1-1 | 3.0 | 1 | 21 | 1174 | 1193 | UGCCAAAGGAGACUUGCCCAG  | UUGGACAA-UCUCCUUUGGCA  | Cleavage    |
|     | osa399h     | CALP010621229.1-1 | 3.0 | 1 | 21 | 940  | 959  | UGCCAAAGGAGACUUGCCCAG  | UUGGACAA-UCUCCUUUGGCA  | Cleavage    |
|     | osa414      | LOC_Os11g37850.1  | 2.5 | 1 | 20 | 2575 | 2594 | UCAUCCUCAUCAUCGUC      | GAUGGUGAUGAUGAGGAGGA   | Cleavage    |
| 174 | osa414      | LOC_Os04g53050.1  | 3.0 | 1 | 20 | 3012 | 3031 | UCAUCCUCAUCAUCGUC      | GAUGUUGAUGAUGAUGAUGA   | Cleavage    |
| 175 | osa416      | LOC_Os08g31780.1  | 2.5 | 1 | 20 | 1650 | 1669 | UGUUCGUCCGUACACUGUUC   | GAACAGUGUAUGGCUGAACAA  | Cleavage    |
| 176 | osa419      | LOC_Os08g20000.1  | 3.0 | 1 | 21 | 2001 | 2020 | UGAUGAAUGCUGACGAUGUUG  | CAACAUC-UCAGCAUUUGUCA  | Cleavage    |
| 177 | osa444b.1   | CAJX011980792.1-1 | 3.0 | 1 | 20 | 2315 | 2334 | UGUUGUCUCAAGCUUGCUGC   | GUAGCAGCUUUGAGAUACA    | Cleavage    |
| 178 | osa444c.1   | CAJX011980792.1-1 | 3.0 | 1 | 20 | 2315 | 2334 | UGUUGUCUCAAGCUUGCUGC   | GUAGCAGCUUUGAGAUACA    | Cleavage    |
|     | osa5071     | 1971358           | 1.5 | 1 | 21 | 1497 | 1517 | UCAAGCAUCAUAUCGUGGACA  | UGUUCAUGAUUAGGUGCUUGA  | Cleavage    |
|     | osa5071     | LOC_Os02g19890.1  | 1.5 | 1 | 21 | 1479 | 1499 | UCAAGCAUCAUAUCGUGGACA  | UGUUCAUGAUUAGGUGCUUGA  | Cleavage    |
|     | osa5071     | LOC_Os11g37780.1  | 2.0 | 1 | 21 | 1473 | 1493 | UCAAGCAUCAUAUCGUGGACA  | UGUCCAUGAUUAGAUUGCUUGA | Cleavage    |
|     | osa5071     | 1978647           | 2.0 | 1 | 21 | 1455 | 1475 | UCAAGCAUCAUAUCGUGGACA  | UGUCCAUGAUUAGAUUCUUGA  | Cleavage    |
|     | osa5071     | Bradi4g04655.1    | 2.0 | 1 | 21 | 1491 | 1511 | UCAAGCAUCAUAUCGUGGACA  | UGUCCAUGAUUAGAUUCUUGA  | Cleavage    |
|     | osa5071     | Bradi3g03882.1    | 1.0 | 1 | 20 | 1471 | 1490 | UCAAGCAUCAUAUCGUGGAC   | GUGCACGAUUGAUGCUUGA    | Cleavage    |
|     | osa5071     | 1970574           | 1.5 | 1 | 20 | 1471 | 1490 | UCAAGCAUCAUAUCGUGGAC   | GUUCAUGAUGUGAUGCUUGA   | Cleavage    |
|     | osa5071     | CAJX010058570.1-2 | 2.0 | 1 | 21 | 1425 | 1445 | UCAAGCAUCAUAUCGUGGACA  | UGUGCAUGAUUAGGUGCUUGA  | Cleavage    |
|     | osa5071     | CAJX010387147.1-1 | 2.0 | 1 | 21 | 1476 | 1496 | UCAAGCAUCAUAUCGUGGACA  | UGUGCAUGAUUAGGUGCUUGA  | Cleavage    |
|     | osa5071     | Bradi2g60434.1    | 2.5 | 1 | 21 | 1500 | 1520 | UCAAGCAUCAUAUCGUGGACA  | UGUCCAUGAUUAGGUGCUCGA  | Cleavage    |
|     | osa5071     | Bradi4g09587.1    | 2.0 | 1 | 21 | 1470 | 1490 | UCAAGCAUCAUAUCGUGGACA  | UGUCCAUGAUUAGGUGCUUGA  | Translation |
|     | osa5071     | LOC_Os08g07330.2  | 2.5 | 1 | 21 | 1533 | 1553 | UCAAGCAUCAUAUCGUGGACA  | UGUUCAUGAUUAGAUUCUUGA  | Cleavage    |
|     | osa5071     | CALP010016119.1-1 | 1.5 | 1 | 20 | 628  | 647  | UCAAGCAUCAUAUCGUGGAC   | GUACAUGAUUAGAUUGCUUGA  | Cleavage    |
|     | osa5071     | LOC_Os01g41890.1  | 1.5 | 1 | 20 | 1507 | 1526 | UCAAGCAUCAUAUCGUGGAC   | GUGCAUGAUUAGAUUGCUUGA  | Cleavage    |
|     | osa5071     | LOC_Os12g37760.1  | 2.0 | 1 | 20 | 1480 | 1499 | UCAAGCAUCAUAUCGUGGAC   | GUCCAUGAUUAGAUUCUUGA   | Cleavage    |
|     | osa5071     | LOC_Os08g10430.1  | 1.5 | 1 | 20 | 901  | 920  | UCAAGCAUCAUAUCGUGGAC   | GUGCAUGAUUAGAUUGCUUGA  | Cleavage    |
|     | osa5071     | LOC_Os12g17090.1  | 1.5 | 1 | 20 | 1465 | 1484 | UCAAGCAUCAUAUCGUGGAC   | GUCCACGAUUAUGUGCUUGA   | Translation |
|     | osa5071     | Bradi1g01387.1    | 1.5 | 1 | 20 | 1498 | 1517 | UCAAGCAUCAUAUCGUGGAC   | GUCCAUGACAUGAUGCUUGA   | Cleavage    |
|     | osa5071     | LOC_Os08g29809.1  | 1.5 | 1 | 20 | 1480 | 1499 | UCAAGCAUCAUAUCGUGGAC   | GUCCAUGAUCUGAUGCUUGA   | Translation |
|     | osa5071     | Bradi4g04657.1    | 2.0 | 1 | 20 | 1441 | 1460 | UCAAGCAUCAUAUCGUGGAC   | GUCCAUGAUUAGAUUCUUGA   | Cleavage    |
|     | osa5071     | LOC_Os08g10440.1  | 1.5 | 1 | 20 | 1483 | 1502 | UCAAGCAUCAUAUCGUGGAC   | GUGCAUGAUUAGAUUGCUUGA  | Cleavage    |
|     | osa5071     | LOC_Os08g01580.1  | 1.5 | 1 | 20 | 1480 | 1499 | UCAAGCAUCAUAUCGUGGAC   | GUGCAUGAUUAGAUUGCUUGA  | Cleavage    |
|     | osa5071     | Bradi4g04662.1    | 2.0 | 1 | 20 | 1480 | 1499 | UCAAGCAUCAUAUCGUGGAC   | GUCCAUGAUUAGAUUCUUGA   | Cleavage    |
|     | osa5071     | LOC_Os10g04110.1  | 1.5 | 1 | 20 | 1414 | 1433 | UCAAGCAUCAUAUCGUGGAC   | GUCCAUGAUUAAUGCUUGA    | Translation |
|     | osa5071     | LOC_Os08g10260.1  | 1.5 | 1 | 20 | 1471 | 1490 | UCAAGCAUCAUAUCGUGGAC   | GUACAUGAUUAGAUUGCUUGA  | Cleavage    |
|     | osa5071     | CALP010002836.1-1 | 3.0 | 1 | 21 | 2192 | 2212 | UCAAGCAUCAUAUCGUGGACA  | UGUUCAUGAUUAGGUUCUUGA  | Cleavage    |
|     | osa5071     | 1978733           | 2.0 | 1 | 20 | 1105 | 1124 | UCAAGCAUCAUAUCGUGGAC   | GUGCAUGAUUAGGUGCUUGA   | Cleavage    |

|         |                   |     |   |    |      |      |                       |                       |             |
|---------|-------------------|-----|---|----|------|------|-----------------------|-----------------------|-------------|
| osa5071 | CAJX010865995.1-1 | 2.5 | 1 | 20 | 949  | 968  | UCAAGCAUCAUAUCGUGGAC  | GUUCAUGAUUGAUUCUUGA   | Cleavage    |
| osa5071 | Bradi2g37172.1    | 2.0 | 1 | 20 | 1342 | 1361 | UCAAGCAUCAUAUCGUGGAC  | GUUCAUGACAUGAUGCUUGA  | Cleavage    |
| osa5071 | LOC_Os12g09240.1  | 2.0 | 1 | 20 | 1453 | 1472 | UCAAGCAUCAUAUCGUGGAC  | GUUCAUGAUUAUGCUUGA    | Translation |
| osa5071 | 1978648           | 2.5 | 1 | 20 | 1441 | 1460 | UCAAGCAUCAUAUCGUGGAC  | GUUCAUGAUUGAUUCUUGA   | Cleavage    |
| osa5071 | 1976234           | 2.0 | 1 | 20 | 1435 | 1454 | UCAAGCAUCAUAUCGUGGAC  | GUUCAUGACAUGAUGCUUGA  | Cleavage    |
| osa5071 | LOC_Os03g46550.1  | 2.0 | 1 | 20 | 1477 | 1496 | UCAAGCAUCAUAUCGUGGAC  | GUGCAUGAUUGGUGCUUGA   | Cleavage    |
| osa5071 | LOC_Os12g13550.1  | 2.5 | 1 | 20 | 1468 | 1487 | UCAAGCAUCAUAUCGUGGAC  | GUUCAUGAUUGAUGCUAGA   | Cleavage    |
| osa5071 | CAJX010839115.1-1 | 3.0 | 1 | 21 | 1110 | 1130 | UCAAGCAUCAUAUCGUGGACA | UGUCCAUGACAUGGUUGA    | Cleavage    |
| osa5071 | 1971330           | 2.0 | 1 | 20 | 4201 | 4220 | UCAAGCAUCAUAUCGUGGAC  | GUGCAUGAUUGGUGCUUGA   | Cleavage    |
| osa5071 | Bradi2g38987.1    | 3.0 | 1 | 21 | 1431 | 1451 | UCAAGCAUCAUAUCGUGGACA | UGUGCACGAUAUGGUACUUGA | Cleavage    |
| osa5071 | LOC_Os12g37740.1  | 3.0 | 1 | 21 | 1572 | 1592 | UCAAGCAUCAUAUCGUGGACA | UGUGCAUGAUUGAUUCUUGA  | Cleavage    |
| osa5071 | Bradi2g09427.1    | 3.0 | 1 | 20 | 1501 | 1520 | UCAAGCAUCAUAUCGUGGAC  | ACCCAUGGUAUGAUGCUUGA  | Cleavage    |
| osa5071 | 1970912           | 3.0 | 1 | 21 | 3612 | 3632 | UCAAGCAUCAUAUCGUGGACA | UGUACACGAUAUGGUUCUUGA | Cleavage    |
| osa5071 | LOC_Os12g37770.1  | 3.0 | 1 | 20 | 1648 | 1667 | UCAAGCAUCAUAUCGUGGAC  | AUCCAUGAUUGAUUCUUGA   | Cleavage    |
| osa5071 | 1971338           | 3.0 | 1 | 20 | 1480 | 1499 | UCAAGCAUCAUAUCGUGGAC  | GUUCAUGAUUGGUGCUAGA   | Cleavage    |
| osa5071 | Bradi3g03587.1    | 2.0 | 1 | 20 | 1477 | 1496 | UCAAGCAUCAUAUCGUGGAC  | GUGCACGAUUUGAUGCUUGA  | Translation |
| osa5071 | Bradi3g03874.1    | 2.0 | 1 | 20 | 1474 | 1493 | UCAAGCAUCAUAUCGUGGAC  | GUGCACGAUUUGAUGCUUGA  | Translation |
| osa5071 | Bradi3g03878.1    | 2.0 | 1 | 20 | 1480 | 1499 | UCAAGCAUCAUAUCGUGGAC  | GUGCACGAUCUGAUGCUUGA  | Translation |
| osa5071 | Bradi1g51687.1    | 2.0 | 1 | 20 | 1492 | 1511 | UCAAGCAUCAUAUCGUGGAC  | GUGCACGACAUGAUGCUUGA  | Cleavage    |
| osa5071 | 1970898           | 3.0 | 1 | 20 | 1690 | 1709 | UCAAGCAUCAUAUCGUGGAC  | GUUCAUGAUUGGUUCUUGA   | Cleavage    |
| osa5071 | 1971042           | 3.0 | 1 | 20 | 1936 | 1955 | UCAAGCAUCAUAUCGUGGAC  | GUUCAUGAUGUGAUUCUUGA  | Cleavage    |
| osa5071 | LOC_Os05g15040.1  | 3.0 | 1 | 20 | 1342 | 1361 | UCAAGCAUCAUAUCGUGGAC  | GUUCAUGAUUGGUUCUUGA   | Cleavage    |
| osa5071 | 1979822           | 3.0 | 1 | 20 | 1507 | 1526 | UCAAGCAUCAUAUCGUGGAC  | GUUCAUGAUUGGUUCUUGA   | Cleavage    |
| osa5071 | LOC_Os10g03570.1  | 3.0 | 1 | 21 | 1512 | 1532 | UCAAGCAUCAUAUCGUGGACA | UGUACAUGACAUGGUGCUUGA | Cleavage    |
| osa5071 | LOC_Os08g42710.1  | 2.5 | 1 | 20 | 3061 | 3080 | UCAAGCAUCAUAUCGUGGAC  | GUCCACGAUCUGAUGCGUGA  | Translation |
| osa5071 | LOC_Os11g34920.1  | 3.0 | 1 | 21 | 1482 | 1502 | UCAAGCAUCAUAUCGUGGACA | UGUACAUGACAUGGUGCUUGA | Cleavage    |
| osa5071 | Bradi4g44575.2    | 3.0 | 1 | 21 | 1482 | 1502 | UCAAGCAUCAUAUCGUGGACA | UGUGCAUGAUCUGGUGCUUGA | Translation |
| osa5071 | CAJX010171387.1-1 | 3.0 | 1 | 21 | 1506 | 1526 | UCAAGCAUCAUAUCGUGGACA | UAUACAUGAUUGGUGCUUGA  | Cleavage    |
| osa5071 | CAJX010860023.1-2 | 3.0 | 1 | 21 | 1476 | 1496 | UCAAGCAUCAUAUCGUGGACA | UUUGCAUGAUUGGUGCUUGA  | Cleavage    |
| osa5071 | CALP010000577.1-1 | 3.0 | 1 | 21 | 2802 | 2822 | UCAAGCAUCAUAUCGUGGACA | UGUACAUGACAUGGUGCUUGA | Cleavage    |
| osa5071 | 1978463           | 3.0 | 1 | 20 | 1510 | 1529 | UCAAGCAUCAUAUCGUGGAC  | CUCCAUGAUACGGUGCUUGA  | Translation |
| osa5071 | 1977825           | 2.5 | 1 | 20 | 1453 | 1472 | UCAAGCAUCAUAUCGUGGAC  | GUACAUGAUUAUGCUUGA    | Translation |
| osa5071 | LOC_Os02g19750.1  | 3.0 | 1 | 20 | 1528 | 1547 | UCAAGCAUCAUAUCGUGGAC  | GUGCAUGAUUGAUGCUGGA   | Cleavage    |
| osa5071 | 1974624           | 3.0 | 1 | 20 | 1411 | 1430 | UCAAGCAUCAUAUCGUGGAC  | GUACAUGAUUGAUGCUGGA   | Cleavage    |
| osa5071 | Bradi1g01377.1    | 3.0 | 1 | 20 | 1483 | 1502 | UCAAGCAUCAUAUCGUGGAC  | GUCCAUGACAUGAUGCUGGA  | Cleavage    |
| osa5071 | 1958759           | 3.0 | 1 | 20 | 1426 | 1445 | UCAAGCAUCAUAUCGUGGAC  | GUGCAUGAUUGAUGCUCGA   | Cleavage    |
| osa5071 | Bradi2g39537.1    | 3.0 | 1 | 20 | 1483 | 1502 | UCAAGCAUCAUAUCGUGGAC  | GUCCAUGAUUCAUCUUGA    | Translation |
| osa5071 | Bradi1g01407.1    | 3.0 | 1 | 20 | 1489 | 1508 | UCAAGCAUCAUAUCGUGGAC  | GUCCAUGACAUGAUGCUGGA  | Cleavage    |
| osa5071 | Bradi4g12877.1    | 3.0 | 1 | 20 | 1537 | 1556 | UCAAGCAUCAUAUCGUGGAC  | GUGCAUGAUUGAUUCUUGA   | Cleavage    |
| osa5071 | CAJX010009846.1-1 | 3.0 | 1 | 20 | 1357 | 1376 | UCAAGCAUCAUAUCGUGGAC  | GUCCAUGAUUCAUGCGUGA   | Translation |
| osa5071 | LOC_Os06g03500.1  | 3.0 | 1 | 20 | 1492 | 1511 | UCAAGCAUCAUAUCGUGGAC  | GUCCAUGAUUAUGCGUGA    | Translation |
| osa5071 | CAJX010854680.1-1 | 2.5 | 1 | 20 | 1465 | 1484 | UCAAGCAUCAUAUCGUGGAC  | GUACAUGACAUGAUGCUUGA  | Cleavage    |
| osa5071 | LOC_Os12g36720.1  | 3.0 | 1 | 20 | 1480 | 1499 | UCAAGCAUCAUAUCGUGGAC  | GUACAUGACAUGGUGCUUGA  | Cleavage    |
| osa5071 | LOC_Os12g36690.1  | 3.0 | 1 | 20 | 1477 | 1496 | UCAAGCAUCAUAUCGUGGAC  | GUACAUGACAUGGUGCUUGA  | Cleavage    |
| osa5071 | LOC_Os12g33160.1  | 3.0 | 1 | 20 | 1510 | 1529 | UCAAGCAUCAUAUCGUGGAC  | GUACAUGACAUGGUGCUUGA  | Cleavage    |
| osa5071 | CAJX010869591.1-1 | 3.0 | 1 | 20 | 1552 | 1571 | UCAAGCAUCAUAUCGUGGAC  | GUACAUGACAUGGUGCUUGA  | Cleavage    |
| osa5071 | Bradi2g37166.1    | 3.0 | 1 | 20 | 1513 | 1532 | UCAAGCAUCAUAUCGUGGAC  | GUUCAUGACAUGCUGCUUGA  | Cleavage    |

|     |             |                   |     |   |    |      |                               |                          |             |
|-----|-------------|-------------------|-----|---|----|------|-------------------------------|--------------------------|-------------|
|     | osa5071     | CAJX010060327.1-3 | 3.0 | 1 | 20 | 1552 | 1571 UCAAGCAUCAUAUCGUGGAC     | GUUCAUGAUCUGUUGCUUGA     | Translation |
|     | osa5071     | CALP010000644.1-1 | 3.0 | 1 | 20 | 1923 | 1942 UCAAGCAUCAUAUCGUGGAC     | GUGCAUGACAUGGUGCUUGA     | Cleavage    |
|     | osa5071     | LOC_Os11g43700.1  | 3.0 | 1 | 20 | 1717 | 1736 UCAAGCAUCAUAUCGUGGAC     | GUGCAUGACAUGGUGCUUGA     | Cleavage    |
| 180 | osa5076     | CALP010028875.1-1 | 3.0 | 1 | 20 | 345  | 364 GAAUUGGGAGCAGAGCAGGU      | ACCUUCUCUCUCCCCUUC       | Translation |
| 181 | osa5079a/b  | CALP010020151.1-1 | 3.0 | 1 | 22 | 161  | 182 UUUUGAUCUGUUUUUUUGGUU     | ACACCAAGCUAGAAGACAAA     | Translation |
| 182 | osa51445p   | CAJX010121988.1-2 | 3.0 | 1 | 20 | 2850 | 2869 UUCUUGUGCUGCUGAAGAGA     | GCUCUUCAGCCGCACAAGAU     | Translation |
|     | osa5145     | CAJX011983953.1-1 | 3.0 | 1 | 22 | 1127 | 1148 ACCUGUUUGGUUUUUUGAGGGC   | GUCCUGAAGAAUCAAACAAGU    | Cleavage    |
| 183 | osa5145     | Bradi2g39091.1    | 3.0 | 1 | 24 | 1053 | 1076 ACCUGUUUGGUUUUUUGAGGGCUA | UUGUCCUCAUGAAUUGGAACAGGU | Translation |
| 184 | osa5147     | Bradi2g36037.1    | 3.0 | 1 | 21 | 3539 | 3559 ACAACUCUUGUGGAUGGAGGG    | CUCCCCAACUACAAGAGUUUGU   | Cleavage    |
| 185 | osa51525p   | LOC_Os08g28540.1  | 3.0 | 1 | 21 | 108  | 128 GUAGGGAUAGGCAUGAUCUCU     | GGAGAUCAAGUCUCUCUCUAC    | Cleavage    |
| 186 | osa5179     | CALP010239820.1-1 | 2.5 | 1 | 21 | 864  | 884 UUUUGUCUCAAGACCGCGCAAC    | GUUGCUUGGUCAUGAGCAAAA    | Translation |
|     | osa5285p    | CALP010152219.1-1 | 3.0 | 1 | 21 | 694  | 714 UGGAAGGGGCAUGCAGAGGAG     | CUCUUCAGCAUGCUCUUUCUA    | Cleavage    |
| 187 | osa5285p    | CALP010002861.1-1 | 3.0 | 1 | 20 | 1254 | 1273 UGGAAGGGGCAUGCAGAGGA     | UUCUUUGCAUAUCCUUUCCA     | Translation |
| 188 | osa529a     | CAJX010853636.1-1 | 3.0 | 1 | 20 | 780  | 799 CUGUACCCUCUCUCUUCUUC      | GAAGAAGAAUGAUGGUACAG     | Translation |
|     | osa5337b    | LOC_Os02g09790.1  | 3.0 | 1 | 20 | 1731 | 1750 CUAGAACGGCAAGCAAUUUG     | UAAAUACCUUGCUGUUCUAG     | Cleavage    |
| 189 | osa5337b    | 1971451           | 3.0 | 1 | 20 | 864  | 883 CUAGAACGGCAAGCAAUUUG      | CAAGUUACUCGUCGUUCUAG     | Translation |
| 190 | osa5340     | CALP010004716.1-1 | 2.0 | 1 | 21 | 1016 | 1036 UGAUGACGUGGAUGAAUUUCA    | UGAAGUUCAUCCGCGUCAUCC    | Cleavage    |
| 191 | osa5487     | 1971451           | 2.5 | 1 | 21 | 1007 | 1027 AAAGAUGUGCAUGUAGUCCG     | UGGGACUAGAUGCAGUCUUU     | Cleavage    |
| 192 | osa5490     | LOC_Os11g37759.1  | 3.0 | 1 | 21 | 325  | 345 UUGGAUUUUUUUUUAGGACGG     | UUGUCCAAGAUAAAGAUCCGA    | Cleavage    |
|     | osa5498     | Bradi4g01117.1    | 2.5 | 1 | 21 | 2780 | 2800 UGAGCUGUAAACACUUGAAGAC   | GUCUUCAGGUGUUUUGGUUCG    | Cleavage    |
| 193 | osa5498     | CAJX011980239.1-1 | 2.5 | 1 | 20 | 2778 | 2797 UGAGCUGUAAACACUUGAAGA    | UCUGCAGGUUUUACAGCUCA     | Translation |
| 194 | osa5510     | Bradi2g36037.1    | 2.5 | 1 | 21 | 3095 | 3115 AGGCUGAUCCACUCCAGAGGA    | UUCUCUGGAGUGGGUUGGCUU    | Cleavage    |
| 195 | osa5521     | CALP010000242.1-1 | 2.5 | 1 | 21 | 3144 | 3164 AGUGGCUGCAUAUCUGAUGAG    | UUUAUCAGAUGGAAGCUACU     | Cleavage    |
| 196 | osa5529     | CALP010181480.1-1 | 3.0 | 1 | 21 | 398  | 418 GUUUCAUCAUGGACACCGCA      | UGUGGCGUUCAUGUAUGAAAC    | Cleavage    |
| 197 | osa5532     | CALP010007889.1-1 | 3.0 | 1 | 22 | 957  | 978 AUGGAUUUAUGACAAAGGUGG     | UCACCUUUGUCAGAUAAUCAU    | Translation |
| 198 | osa5799     | Bradi5g22842.1    | 2.5 | 1 | 20 | 2148 | 2167 AAGACGAAUUAUCAACGUU      | AACGUUUGGUGAUUUUUUUU     | Translation |
| 199 | osa5815     | LOC_Os02g30150.1  | 3.0 | 1 | 23 | 1262 | 1284 AAUGUUUUGGACACUAGAUGACA  | UGGCAUCAAGUGUUCUAAUUA    | Cleavage    |
| 200 | osa5817     | 1970902           | 3.0 | 1 | 22 | 1779 | 1800 AUCGAAUUUGAAAGAAAAGGU    | AUCUUUUUCAUCAAUUUUGGG    | Cleavage    |
| 201 | osa5818     | CAJX010177111.1-1 | 3.0 | 1 | 21 | 464  | 484 UCGAACUAGAAGGGCCAGGUU     | GAUUUGAUCCUUCUAGUUUGA    | Cleavage    |
| 202 | osa5822     | LOC_Os04g53120.1  | 3.0 | 1 | 20 | 3230 | 3249 UGUCUGCUCGAUGUCAGGUU     | AAUUUGAAAUCGAGCGGACG     | Cleavage    |
| 203 | osa5827     | CAJX010010925.1-2 | 3.0 | 1 | 20 | 2911 | 2930 UUUUGUUGCAAUUUGGACUAC    | CUAGUCCAUGUUGCAACAGA     | Cleavage    |
| 204 | osa5829     | LOC_Os12g30760.1  | 3.0 | 1 | 20 | 199  | 218 AUCAGGACAGUAGGCGAUG       | CAUCGUCUACUGGUUUCGAU     | Cleavage    |
|     | osa5832     | 1955304           | 3.0 | 1 | 20 | 1120 | 1139 UUGGCGGAGCGGUUGCUGUC     | GACAGCAGCCGUGCCGUCGA     | Cleavage    |
| 205 | osa5832     | LOC_Os01g25630.1  | 3.0 | 1 | 20 | 2019 | 2038 UUGGCGGAGCGGUUGCUGUC     | GACACCAACUGCGCUGCCAA     | Cleavage    |
| 206 | osa5835     | LOC_Os10g21950.1  | 3.0 | 1 | 20 | 5290 | 5309 ACGAAACCAUAGGGAUUUUG     | CAAAUCUCGAGGGUUUUUGU     | Translation |
|     | osa6248     | CALP010010878.1-1 | 3.0 | 1 | 21 | 2044 | 2064 UAUUUGAGGAUGGAGGUAGUA    | UAUUUUUUUCAUCUCAAUUG     | Cleavage    |
| 207 | osa6248     | CALP010000049.1-1 | 2.5 | 1 | 21 | 326  | 346 UAUUUGAGGAUGGAGGUAGUA     | UACUCCAUCUUCUCAAUA       | Cleavage    |
|     | osa6248     | Bradi5g22187.1    | 3.0 | 1 | 20 | 2306 | 2325 UAUUUGAGGAUGGAGGUAGU     | AGUGUCUCCAUCUCAAAGUA     | Cleavage    |
|     | osa6248     | LOC_Os03g36920.1  | 3.0 | 1 | 20 | 269  | 288 UAUUUGAGGAUGGAGGUAGU      | ACCGCCUCCAUCUCAAUUG      | Cleavage    |
| 208 | osa6253     | CALP010001887.1-1 | 2.5 | 1 | 21 | 3204 | 3224 GAGGAAAGUGGGCAGUUGGGU    | GUCCAGCUGCUCAAUUUCCUC    | Cleavage    |
|     | osa815a/b/c | LOC_Os05g41290.1  | 2.5 | 1 | 21 | 2965 | 2985 AAGGGGAUUGAGGAGAUUGGG    | UCCAAUCUAAUCAAUCCUCU     | Cleavage    |
| 209 | osa815a/b/c | 1981332           | 2.5 | 1 | 21 | 2959 | 2979 AAGGGGAUUGAGGAGAUUGGG    | UCCAAUCUAAUCAAUCCUCU     | Cleavage    |
|     | osa815a/b/c | 1965627           | 2.5 | 1 | 21 | 2394 | 2414 AAGGGGAUUGAGGAGAUUGGG    | UCCACUGUCCUCAAUCUCCU     | Cleavage    |
| 210 | osa816      | LOC_Os05g40160.1  | 3.0 | 1 | 20 | 2590 | 2609 GUGACAUUUUUACUACAAC      | UUUGUAGUGAAAAGUGUCAC     | Cleavage    |
| 211 | osa827      | 1983466           | 3.0 | 1 | 21 | 713  | 734 UUAGAUGA-CCAUCAGCAAACA    | UUUUUGGUGAUGGCUAUCUAA    | Translation |
| 212 | sbi167a/b   | CALP010007316.1-1 | 2.0 | 1 | 21 | 268  | 288 UGAAGCUGCCAGCAUGAUCUA     | UCGAUCAUGUUGGCAGCUUCG    | Cleavage    |
|     | sbi167a/b   | LOC_Os07g29820.1  | 2.5 | 1 | 21 | 2609 | 2629 UGAAGCUGCCAGCAUGAUCUA    | UAGAUCAUGCUGACAGCCUCA    | Translation |

|      |              |                   |     |   |    |      |      |                        |                        |             |
|------|--------------|-------------------|-----|---|----|------|------|------------------------|------------------------|-------------|
| 213  | sbi167c_g    | CALP010007316.1-1 | 2.0 | 1 | 20 | 269  | 288  | UGAAGCUGCCAGCAUGAUCU   | CGAUCAUGUUGGCAGCUUCG   | Cleavage    |
|      | sbi167c_g    | LOC_Os07g29820.1  | 2.5 | 1 | 21 | 2609 | 2629 | UGAAGCUGCCAGCAUGAUCUG  | UAGAUCUAGCUGACAGCCUCA  | Translation |
| 214  | sbi167h      | CALP010007316.1-1 | 2.0 | 1 | 20 | 269  | 288  | UGAAGCUGCCAGCAUGAUCU   | CGAUCAUGUUGGCAGCUUCG   | Cleavage    |
|      | sbi167h      | LOC_Os07g29820.1  | 2.5 | 1 | 21 | 2609 | 2629 | UGAAGCUGCCAGCAUGAUCUG  | UAGAUCUAGCUGACAGCCUCA  | Translation |
| 215  | sbi167i      | CALP010007316.1-1 | 2.0 | 1 | 21 | 268  | 288  | UGAAGCUGCCAGCAUGAUCUA  | UCCAUCUAGUUGGCAGCUUCG  | Cleavage    |
|      | sbi167i      | LOC_Os07g29820.1  | 2.5 | 1 | 21 | 2609 | 2629 | UGAAGCUGCCAGCAUGAUCUA  | UAGAUCUAGCUGACAGCCUCA  | Translation |
| 216  | sbi172b      | CALP010014150.1-1 | 3.0 | 1 | 20 | 577  | 596  | GGAUUCUUGAUGAUGAUCUGCA | GGCAGCAUCAUGGAGGUUCC   | Translation |
|      | sbi21183p    | Bradi4g14697.1    | 2.0 | 1 | 22 | 536  | 557  | UUCCUGAUGCCUCCCAUGCCUA | UGGGCAUGGGAGGUGUUGGGAA | Cleavage    |
|      | sbi21183p    | 1973916           | 2.0 | 1 | 22 | 314  | 335  | UUCCUGAUGCCUCCCAUGCCUA | UAGGCAUGGGAGGGAUUGGGAA | Translation |
|      | sbi21183p    | LOC_Os04g30690.1  | 1.5 | 1 | 22 | 749  | 770  | UUCCUGAUGCCUCCCAUGCCUA | UUGGCAUGGGGGCGUCGGGAA  | Cleavage    |
|      | sbi21183p    | LOC_Os04g30610.1  | 1.5 | 1 | 22 | 497  | 518  | UUCCUGAUGCCUCCCAUGCCUA | UUGGCAUGGGAGGUGUCGGGAA | Cleavage    |
|      | sbi21183p    | LOC_Os04g30660.1  | 2.0 | 1 | 22 | 749  | 770  | UUCCUGAUGCCUCCCAUGCCUA | UUGGUAUGGGCGGCAUCGGGAA | Cleavage    |
|      | sbi21183p    | CALP010032206.1-1 | 3.0 | 1 | 22 | 1584 | 1605 | UUCCUGAUGCCUCCCAUGCCUA | UAGGCAUCGGAGGAAUUGGGAA | Translation |
|      | sbi21183p    | CALP010358028.1-1 | 3.0 | 1 | 22 | 359  | 380  | UUCCUGAUGCCUCCCAUGCCUA | UAGGCAUCGGAGGAAUUGGGAA | Translation |
|      | sbi21183p    | CAJX010075181.1-1 | 2.5 | 1 | 21 | 597  | 617  | UUCCUGAUGCCUCCCAUGCCU  | GGGUAUGGGUGGUAUCGGGAA  | Cleavage    |
| 217* | sbi21183p    | CAJX010010925.1-1 | 3.0 | 1 | 21 | 873  | 893  | UUCCUGAUGCCUCCCAUGCCU  | AGGGAUGGGAGGCAUCGGUAA  | Cleavage    |
|      | sbi21183p    | CAJX010864692.1-1 | 2.5 | 1 | 21 | 597  | 617  | UUCCUGAUGCCUCCCAUGCCU  | GGGUAUGGGUGGUAUCGGGAA  | Cleavage    |
|      | sbi21183p    | LOC_Os04g30530.1  | 3.0 | 1 | 22 | 1052 | 1073 | UUCCUGAUGCCUCCCAUGCCUA | UUGGCAUGGGAGGUGUCGGCAA | Cleavage    |
|      | sbi21183p    | CALP010631233.1-1 | 3.0 | 1 | 22 | 206  | 227  | UUCCUGAUGCCUCCCAUGCCUA | UUGGCAUGGGAGGUGUCGGAAA | Cleavage    |
|      | sbi21183p    | LOC_Os01g05600.1  | 3.0 | 1 | 21 | 585  | 605  | UUCCUGAUGCCUCCCAUGCCU  | GGGGAUGGGAGGCAUCGGUAA  | Cleavage    |
|      | sbi21183p    | LOC_Os01g05620.1  | 3.0 | 1 | 21 | 588  | 608  | UUCCUGAUGCCUCCCAUGCCU  | GGGGAUGGGAGGCAUCGGUAA  | Cleavage    |
|      | sbi21183p    | LOC_Os08g42700.1  | 3.0 | 1 | 21 | 1377 | 1397 | UUCCUGAUGCCUCCCAUGCCU  | GGGAAUGGGUGGCAUUGGGAA  | Cleavage    |
|      | sbi21183p    | LOC_Os09g30220.1  | 3.0 | 1 | 21 | 636  | 656  | UUCCUGAUGCCUCCCAUGCCU  | GGGCAUGGGUGGCCUUGGGAA  | Cleavage    |
|      | sbi21183p    | CALP010183577.1-1 | 2.5 | 1 | 20 | 607  | 626  | UUCCUGAUGCCUCCCAUGCC   | GGCAUGGGAGGGCUCGGGAA   | Translation |
|      | sbi21183p    | Bradi5g03110.1    | 3.0 | 1 | 20 | 598  | 616  | UUCCUGAUGCCUCCCAUGCC   | GGCAUGGGAGGC-UUGGGAA   | Cleavage    |
| 218  | sbi396a/b    | LOC_Os12g10180.1  | 3.0 | 1 | 20 | 461  | 480  | UCCACAGCUUUCUUGAACU    | GGUUGAGGGAAGCUGUGGAG   | Cleavage    |
| 219  | sbi396c      | LOC_Os12g10180.1  | 3.0 | 1 | 21 | 460  | 480  | UCCACAGCUUUCUUGAACUU   | AGGUUGAGGGAAGCUGUGGAG  | Cleavage    |
| 220  | sbi3975p     | CALP010010603.1-1 | 2.5 | 1 | 20 | 687  | 706  | UCAUUGAGUGCAGCGUUGAU   | AUCAUUGUUGAACUCAGUGA   | Translation |
|      | sbi399e/f    | LOC_Os05g30220.1  | 2.5 | 1 | 21 | 1180 | 1200 | UGCCAAGGAGAUUUGCCAG    | CUUGGAAGAUCCUUUGGCA    | Cleavage    |
|      | sbi399e/f    | LOC_Os11g44960.1  | 3.0 | 1 | 21 | 1882 | 1902 | UGCCAAGGAGAUUUGCCAG    | UUGCGCAGACUCCUUUGGCA   | Cleavage    |
| 221  | sbi399e/f    | LOC_Os11g45050.1  | 3.0 | 1 | 21 | 1879 | 1899 | UGCCAAGGAGAUUUGCCAG    | UUGCGCAGACUCCUUUGGCA   | Cleavage    |
|      | sbi399e/f    | CALP010340526.1-1 | 3.0 | 1 | 21 | 1173 | 1193 | UGCCAAGGAGAUUUGCCAG    | CUUGGACAAUCUCCUUUGGCA  | Cleavage    |
|      | sbi399e/f    | CALP010621229.1-1 | 3.0 | 1 | 21 | 939  | 959  | UGCCAAGGAGAUUUGCCAG    | CUUGGACAAUCUCCUUUGGCA  | Cleavage    |
| 222  | sbi528       | CALP010152219.1-1 | 3.0 | 1 | 21 | 694  | 714  | UGGAAGGGGCAUGCAGAGGAG  | CUCUUCAGCAUGCUCUUUCUA  | Cleavage    |
|      | sbi528       | CALP010002861.1-1 | 3.0 | 1 | 20 | 1254 | 1273 | UGGAAGGGGCAUGCAGAGGA   | UUCUUUGCAUACUUUCCA     | Translation |
| 223  | sbi529       | CAJX010853636.1-1 | 3.0 | 1 | 20 | 780  | 799  | CUGUACCCUCUCUCUUCUUC   | GAAGAAGAAUGAUGGUACAG   | Translation |
| 224  | sbi5564a     | CAJX010058397.1-2 | 2.5 | 1 | 20 | 345  | 364  | UGGGGAAGCAAUCGUCGAA    | UUCGACGAAAUGCUCCGCA    | Translation |
| 225  | sbi5564b     | LOC_Os04g43340.1  | 3.0 | 1 | 20 | 518  | 537  | GCAAUUCGUUGCAAGCAUUG   | CCAGCUGUUUGAGGAAAUGC   | Cleavage    |
| 226  | sbi5567      | Bradi2g09434.1    | 2.0 | 1 | 20 | 2445 | 2464 | UAAUUGAUUCAUGAUGUGU    | GCACAUACGUGAUUCAUUA    | Cleavage    |
| 227  | sbi5568c3p   | CALP010000973.1-1 | 3.0 | 1 | 21 | 3562 | 3582 | ACUUAAGUUUGAAGCGAGG    | CCUCCAUUCCUAAAUGUAAGU  | Translation |
|      | sbi5568c5p   | CALP010000973.1-1 | 2.5 | 1 | 20 | 3693 | 3712 | UCUGUCCAAAUUGUAAGUC    | GACUUACAUUUAGGAACGGA   | Translation |
| 228  | sbi5568c5p   | Bradi2g39847.1    | 3.0 | 1 | 20 | 552  | 571  | UCUGUCCAAAUUGUAAGUC    | GAAUGAUGAUUUUGGAACAGA  | Cleavage    |
| 229  | sbi5568f3p   | CAJX010060929.1-1 | 2.0 | 1 | 20 | 3490 | 3509 | GUCUUUAUAAUUGGAUUGGA   | UCCAUUCCUAAAUAUAGAC    | Translation |
| 230  | sbi6217a/b5p | CALP010000232.1-1 | 3.0 | 1 | 20 | 3538 | 3557 | UAGCCACUUUGAGUUACGAU   | AUCAUACUCAAAGUGGUUA    | Cleavage    |
|      | sbi62183p    | LOC_Os04g53030.1  | 3.0 | 1 | 20 | 4156 | 4175 | ACAAGUUUCGUAUUUUUGG    | CUAAAGAUCAUGAAGCUUGC   | Cleavage    |
| 231  | sbi62183p    | Bradi1g22500.1    | 3.0 | 1 | 20 | 517  | 536  | ACAAGUUUCGUAUUUUUGG    | CCAGAGUAACAAAACUUGU    | Translation |
| 232  | sbi62303p    | CALP010019386.1-1 | 3.0 | 1 | 20 | 336  | 355  | UAACAAGUUUAGGGAUCUAG   | AUAGAUCUGAAACUUGUUG    | Translation |

|     |            |                   |     |   |    |      |      |                        |                         |             |
|-----|------------|-------------------|-----|---|----|------|------|------------------------|-------------------------|-------------|
| 233 | sbi62305p  | LOC_Os09g14010.1  | 3.0 | 1 | 21 | 1771 | 1791 | UUUUGGGUCCCUAAACUUGUU  | GAAAAGUUUGGGGACUUGAAA   | Cleavage    |
|     | sbi62305p  | 1956397           | 3.0 | 1 | 21 | 1717 | 1736 | UUUUGGGUCCCUAAACUUGUU  | AACAAGUU-AGGGAUUCAAAA   | Cleavage    |
| 234 | sbi62313p  | LOC_Os11g12040.1  | 3.0 | 1 | 21 | 509  | 529  | UAUUUGUGGACUCAUGGACAU  | AUGUUUAUGAGUUAACAGAU    | Cleavage    |
| 235 | sbi6232a5p | 1969591           | 3.0 | 1 | 20 | 370  | 389  | GUCGCUUUGACUUUUUUGGU   | AUCAAGCAGUCAAGGUGAC     | Cleavage    |
| 236 | sbi62333p  | CAJX011976265.1-1 | 3.0 | 1 | 20 | 5219 | 5238 | CAAGUUUGUUUUUGGUAAUU   | AGUUACCAGAGCUGAGCUUG    | Cleavage    |
|     | sbi62333p  | CALP010139700.1-1 | 3.0 | 1 | 21 | 635  | 655  | CAAGUUUGUUUUUGGUAAUU   | UCAUUACCACAAUUGAGCUUG   | Cleavage    |
| 237 | sbi821d    | LOC_Os08g10260.1  | 2.5 | 1 | 20 | 802  | 821  | AAGUCAUCAACAACAAAGUU   | CUUUUUUGUUGUUGAGACUU    | Cleavage    |
| 238 | tae1120a   | Bradi2g60250.1    | 3.0 | 1 | 19 | 10   | 29   | ACAUUCUU-AUAUUUUGAGA   | UCCCAUAAUUGAAGAAUGU     | Translation |
| 239 | tae1120c5p | LOC_Os12g30720.1  | 3.0 | 1 | 20 | 761  | 780  | UAUAUAAGAACGUUUUUUGA   | GUAAAAUUUUUCUUAUAUUUA   | Cleavage    |
|     | tae1120c5p | LOC_Os12g30760.1  | 3.0 | 1 | 20 | 1070 | 1089 | UAUAUAAGAACGUUUUUUGA   | GUAAAAUUUUUCUUAUAUUUA   | Cleavage    |
| 240 | tae1121    | CALP010009097.1-1 | 3.0 | 1 | 22 | 934  | 955  | AGUAGUGAUCUAAACGCUCUUA | UAAGAGCGUUUAGAUGACUCCU  | Cleavage    |
| 241 | tae1122b3p | CALP010000973.1-1 | 2.5 | 1 | 21 | 3564 | 3584 | AGACUUAUAUGUAGGAACGGA  | UCCAUCCUAAAUGUAAGUCU    | Translation |
| 242 | tae1134    | CALP010157740.1-1 | 3.0 | 1 | 23 | 1372 | 1394 | CAACAACAACAAGAAGAAGA   | UUUUGUUCUGCUUCUUGUUGUG  | Translation |
| 243 | tae1137a   | CAJX010167231.1-1 | 3.0 | 1 | 20 | 715  | 734  | UAGUACAAGUUGAGUCAUC    | ACUGUCUCAACUUUGUACUA    | Cleavage    |
| 244 | tae167a    | CALP010007316.1-1 | 2.0 | 1 | 21 | 268  | 288  | UGAAGCUGCCAGCAUGAUCUA  | UCGAUCAUGUUGGCAGCUUCG   | Cleavage    |
|     | tae167a    | LOC_Os07g29820.1  | 2.5 | 1 | 21 | 2609 | 2629 | UGAAGCUGCCAGCAUGAUCUA  | UAGAUCUAGCUGACAGCCUCA   | Translation |
| 245 | tae167b    | LOC_Os07g29820.1  | 2.5 | 1 | 21 | 2609 | 2629 | UGAAGCUGACAGCAUGAUCUA  | UAGAUCUAGCUGACAGCCUCA   | Translation |
|     | tae167b    | CALP010007316.1-1 | 3.0 | 1 | 21 | 268  | 288  | UGAAGCUGACAGCAUGAUCUA  | UCGAUCAUGUUGGCAGCUUCG   | Translation |
| 246 | tae167c5p  | CALP010007316.1-1 | 2.0 | 1 | 22 | 267  | 288  | UGAAGCUGCCAGCAUGAUCUGC | GUCGAUCAUGUUGGCAGCUUCG  | Cleavage    |
|     | tae167c5p  | LOC_Os07g29820.1  | 2.5 | 1 | 21 | 2609 | 2629 | UGAAGCUGCCAGCAUGAUCUG  | UAGAUCUAGCUGACAGCCUCA   | Translation |
| 247 | tae395b    | Bradi2g52840.1    | 3.0 | 1 | 20 | 3046 | 3065 | UGAAGUGUUUGGGGAACUC    | GGUUUACCUAAACACUUCA     | Cleavage    |
| 248 | tae50493p  | CALP010026738.1-1 | 3.0 | 1 | 20 | 774  | 793  | AAUAUGGAUCGGAGGGAGUA   | UACUCCUUCAUCCAAAUU      | Translation |
|     | tae77575p  | LOC_Os11g32210.1  | 0.0 | 1 | 22 | 1262 | 1283 | AUAAAACCUUCAGCUAUCCAUC | GAUGGAUAGCUGAAGGUUUUUAU | Cleavage    |
|     | tae77575p  | Bradi4g01687.2    | 0.0 | 1 | 22 | 1367 | 1388 | AUAAAACCUUCAGCUAUCCAUC | GGUGGAUAGCUGAAGGUUUUUAU | Cleavage    |
|     | tae77575p  | 1971306           | 0.5 | 1 | 22 | 1532 | 1553 | AUAAAACCUUCAGCUAUCCAUC | GAUGGAUAGCUGAAGGUUUUGU  | Cleavage    |
|     | tae77575p  | LOC_Os09g09490.1  | 0.0 | 1 | 21 | 1371 | 1391 | AUAAAACCUUCAGCUAUCCAUC | AUGGAUAGCUGAAGGUUUUUAU  | Cleavage    |
|     | tae77575p  | 1956664           | 1.0 | 1 | 22 | 1295 | 1316 | AUAAAACCUUCAGCUAUCCAUC | GAUGGAUAGCUGAAGGUUUUGU  | Cleavage    |
|     | tae77575p  | LOC_Os08g07330.2  | 0.5 | 1 | 21 | 1344 | 1364 | AUAAAACCUUCAGCUAUCCAUC | AUGGAUAGCUGAAGGUUUUGU   | Cleavage    |
|     | tae77575p  | LOC_Os12g17490.1  | 1.5 | 1 | 22 | 1361 | 1382 | AUAAAACCUUCAGCUAUCCAUC | GAUGGAUAGCUGAAGGUUUUCAU | Cleavage    |
|     | tae77575p  | LOC_Os11g03650.1  | 0.0 | 1 | 21 | 1494 | 1514 | AUAAAACCUUCAGCUAUCCAUC | GUGGAUAGCUGAAGGUUUUUAU  | Cleavage    |
|     | tae77575p  | Bradi1g01377.1    | 1.0 | 1 | 22 | 1340 | 1361 | AUAAAACCUUCAGCUAUCCAUC | GAUGGAUAGCAGAAGGUUUUUAU | Cleavage    |
|     | tae77575p  | LOC_Os11g15500.1  | 1.5 | 1 | 22 | 1379 | 1400 | AUAAAACCUUCAGCUAUCCAUC | GAUGGAUAGCUGAAGGUUUUCAU | Cleavage    |
|     | tae77575p  | 1978647           | 1.0 | 1 | 22 | 1313 | 1334 | AUAAAACCUUCAGCUAUCCAUC | GAUGGAUUGCUGAAGGUUUUUAU | Cleavage    |
|     | tae77575p  | LOC_Os08g29854.1  | 1.5 | 1 | 22 | 1325 | 1346 | AUAAAACCUUCAGCUAUCCAUC | GAUGGAUAGCUGAAGGUUUUCAU | Cleavage    |
|     | tae77575p  | LOC_Os06g33360.1  | 1.5 | 1 | 22 | 1349 | 1370 | AUAAAACCUUCAGCUAUCCAUC | GGUGGAUAGGUGAAGGUUUUGU  | Cleavage    |
|     | tae77575p  | LOC_Os12g09240.1  | 1.0 | 1 | 21 | 1311 | 1331 | AUAAAACCUUCAGCUAUCCAUC | AUGGAUGGCUGAAGGUUUUGU   | Cleavage    |
|     | tae77575p  | LOC_Os01g41890.1  | 2.0 | 1 | 22 | 1361 | 1382 | AUAAAACCUUCAGCUAUCCAUC | GGUGGAUAGCUGAAGAUUUUGU  | Cleavage    |
|     | tae77575p  | 1957195           | 0.0 | 1 | 21 | 1830 | 1850 | AUAAAACCUUCAGCUAUCCAUC | GUGGAUAGCUGAAGGUUUUUAU  | Cleavage    |
|     | tae77575p  | LOC_Os11g32170.1  | 1.5 | 1 | 22 | 1373 | 1394 | AUAAAACCUUCAGCUAUCCAUC | GAUGGAUAGCUGAAGAUUUUUAU | Cleavage    |
|     | tae77575p  | 1970902           | 1.5 | 1 | 22 | 1418 | 1439 | AUAAAACCUUCAGCUAUCCAUC | GGUGGAUAGCUGAAGGUUUUCAU | Cleavage    |
|     | tae77575p  | LOC_Os10g04110.1  | 2.0 | 1 | 22 | 1271 | 1292 | AUAAAACCUUCAGCUAUCCAUC | GAUGGAUAGCUGAAGGCUUUGU  | Cleavage    |
|     | tae77575p  | Bradi4g09597.1    | 1.5 | 1 | 22 | 1478 | 1499 | AUAAAACCUUCAGCUAUCCAUC | GAUGGAUAGCGGAAGGUUUUGU  | Cleavage    |
|     | tae77575p  | 1971449           | 2.0 | 1 | 22 | 1568 | 1589 | AUAAAACCUUCAGCUAUCCAUC | GAUGGAUAGCUGAAGGCUUUGU  | Cleavage    |
|     | tae77575p  | LOC_Os10g03570.1  | 1.5 | 1 | 22 | 1367 | 1388 | AUAAAACCUUCAGCUAUCCAUC | GGUGGAUAGCAGAAGGUUUUGU  | Cleavage    |
|     | tae77575p  | 1971338           | 2.0 | 1 | 22 | 1331 | 1352 | AUAAAACCUUCAGCUAUCCAUC | GGUGGAUAGCUGAAGGAUUUGU  | Cleavage    |
|     | tae77575p  | LOC_Os10g22484.1  | 1.0 | 1 | 21 | 1371 | 1391 | AUAAAACCUUCAGCUAUCCAUC | AUGGGUGGCUGAAGGUUUUUAU  | Cleavage    |
|     | tae77575p  | LOC_Os11g37850.1  | 1.0 | 1 | 21 | 1347 | 1367 | AUAAAACCUUCAGCUAUCCAUC | GUGGGUAGCUGAAGGUUUUGU   | Cleavage    |

|           |                   |     |   |    |      |      |                        |                         |             |
|-----------|-------------------|-----|---|----|------|------|------------------------|-------------------------|-------------|
| tae77575p | LOC_Os11g16470.1  | 1.5 | 1 | 21 | 1353 | 1373 | AUAAAACCUUCAGCUAUCCAUC | AUGGAUAGCUGAAGGAUUUUAU  | Cleavage    |
| tae77575p | LOC_Os12g28100.1  | 1.5 | 1 | 21 | 1335 | 1355 | AUAAAACCUUCAGCUAUCCAUC | AUGGAUAGCUGAAGGAUUUUAU  | Cleavage    |
| tae77575p | 1970912           | 0.5 | 1 | 21 | 3471 | 3491 | AUAAAACCUUCAGCUAUCCAUC | GUGGAUAGCUGAAGGUUUUUGU  | Cleavage    |
| tae77575p | 1982629           | 1.5 | 1 | 22 | 1424 | 1445 | AUAAAACCUUCAGCUAUCCAUC | GGUGGAUAGCAGAAGGUUUUUGU | Cleavage    |
| tae77575p | Bradi2g39091.1    | 2.0 | 1 | 22 | 1358 | 1379 | AUAAAACCUUCAGCUAUCCAUC | GGUGGAUAGCUGAAGGCUUUUGU | Cleavage    |
| tae77575p | 1979031           | 0.0 | 1 | 21 | 6168 | 6188 | AUAAAACCUUCAGCUAUCCAUC | GUGGAUAGCUGAAGGUUUUUAU  | Cleavage    |
| tae77575p | LOC_Os05g40150.1  | 1.5 | 1 | 21 | 1359 | 1379 | AUAAAACCUUCAGCUAUCCAUC | AUGGAUAGCUGAAGGUUUUUAU  | Cleavage    |
| tae77575p | 1983466           | 2.0 | 1 | 22 | 1373 | 1394 | AUAAAACCUUCAGCUAUCCAUC | GAUGGAUAGCAGAGGGUUUUGU  | Cleavage    |
| tae77575p | CALP010093416.1-1 | 3.0 | 1 | 22 | 1584 | 1605 | AUAAAACCUUCAGCUAUCCAUC | GAUGGAUAGCUGAAGGCUUCAU  | Cleavage    |
| tae77575p | 1976910           | 1.5 | 1 | 21 | 1320 | 1340 | AUAAAACCUUCAGCUAUCCAUC | AUGGGUAGCUCAAGGUUUUUAU  | Translation |
| tae77575p | 1978733           | 3.0 | 1 | 22 | 962  | 983  | AUAAAACCUUCAGCUAUCCAUC | GAUGGAUAGCUGAAGGGUUCAU  | Cleavage    |
| tae77575p | LOC_Os12g17410.1  | 3.0 | 1 | 22 | 1202 | 1223 | AUAAAACCUUCAGCUAUCCAUC | GAUGGAUAGCUGAAGGCUUCAU  | Cleavage    |
| tae77575p | LOC_Os08g01580.1  | 1.5 | 1 | 21 | 1338 | 1358 | AUAAAACCUUCAGCUAUCCAUC | GUGGAUAGCUGAAGGUUUUUAU  | Cleavage    |
| tae77575p | LOC_Os02g35210.1  | 2.0 | 1 | 21 | 1338 | 1358 | AUAAAACCUUCAGCUAUCCAUC | AUGGAUAGCUGAAGGAUUUUGU  | Cleavage    |
| tae77575p | CAJX010844276.1-1 | 2.5 | 1 | 21 | 816  | 836  | AUAAAACCUUCAGCUAUCCAUC | AUGGAUGGCUAAGGUUUUCGU   | Cleavage    |
| tae77575p | 1978730           | 3.0 | 1 | 22 | 1313 | 1334 | AUAAAACCUUCAGCUAUCCAUC | GAUGGAUAGCUGAAGGGUUCAU  | Cleavage    |
| tae77575p | Bradi1g48747.1    | 1.5 | 1 | 21 | 1479 | 1499 | AUAAAACCUUCAGCUAUCCAUC | GUGGAUAGCUGAAGGUUUUCAU  | Cleavage    |
| tae77575p | CALP010016119.1-1 | 3.0 | 1 | 21 | 489  | 509  | AUAAAACCUUCAGCUAUCCAUC | AUGGCUGGCUAAGGAUUUUAU   | Cleavage    |
| tae77575p | LOC_Os12g17090.1  | 3.0 | 1 | 22 | 1322 | 1343 | AUAAAACCUUCAGCUAUCCAUC | GAUGGAUAGCUGAAGGAUUUCAU | Cleavage    |
| tae77575p | LOC_Os12g17480.1  | 3.0 | 1 | 22 | 1310 | 1331 | AUAAAACCUUCAGCUAUCCAUC | GAUGGAUAGCUGAAGGGUUCAU  | Cleavage    |
| tae77575p | Bradi2g39207.1    | 2.5 | 1 | 22 | 1355 | 1376 | AUAAAACCUUCAGCUAUCCAUC | GAUGGAUAGCGGAAGGCUUUUAU | Cleavage    |
| tae77575p | LOC_Os11g40780.1  | 1.5 | 1 | 21 | 1392 | 1412 | AUAAAACCUUCAGCUAUCCAUC | GUGGAUAGCUGAAGGCUUUUAU  | Cleavage    |
| tae77575p | 1983462           | 2.5 | 1 | 22 | 1181 | 1202 | AUAAAACCUUCAGCUAUCCAUC | GGUGGGUAGCUGAAGGGUUUUGU | Cleavage    |
| tae77575p | Bradi1g01387.1    | 2.5 | 1 | 22 | 1355 | 1376 | AUAAAACCUUCAGCUAUCCAUC | GAUGGAUAGCAGAAGGCUUUUAU | Cleavage    |
| tae77575p | Bradi4g20527.1    | 2.5 | 1 | 22 | 1352 | 1373 | AUAAAACCUUCAGCUAUCCAUC | GAUGGAUAUCUGAAGGAUUUUAU | Cleavage    |
| tae77575p | 1976234           | 2.5 | 1 | 22 | 1292 | 1313 | AUAAAACCUUCAGCUAUCCAUC | GAUGGAUAGCAGAAGGCUUUUAU | Cleavage    |
| tae77575p | Bradi4g04657.1    | 2.5 | 1 | 22 | 1298 | 1319 | AUAAAACCUUCAGCUAUCCAUC | GAUGGAUUGCUGAAGGUUUUCAU | Cleavage    |
| tae77575p | Bradi1g01407.1    | 2.5 | 1 | 22 | 1346 | 1367 | AUAAAACCUUCAGCUAUCCAUC | GAUGGAUAGCAGAAGGCUUUUAU | Cleavage    |
| tae77575p | 1971299           | 3.0 | 1 | 22 | 1352 | 1373 | AUAAAACCUUCAGCUAUCCAUC | GAUGGAUAGCUGAAGGAUUUCAU | Cleavage    |
| tae77575p | Bradi4g04655.1    | 2.5 | 1 | 22 | 1349 | 1370 | AUAAAACCUUCAGCUAUCCAUC | GAUGGAUUGCUGAAGGUUUUCAU | Cleavage    |
| tae77575p | Bradi1g01257.1    | 2.5 | 1 | 22 | 1346 | 1367 | AUAAAACCUUCAGCUAUCCAUC | GAUGGAUAGCAGAAGGCUUUUAU | Cleavage    |
| tae77575p | Bradi2g37166.1    | 2.5 | 1 | 22 | 1370 | 1391 | AUAAAACCUUCAGCUAUCCAUC | GAUGGAUAGCAGAAGGAUUUUAU | Cleavage    |
| tae77575p | LOC_Os08g31780.1  | 2.5 | 1 | 22 | 1373 | 1394 | AUAAAACCUUCAGCUAUCCAUC | GAUGGAUCGUGAAGGAUUUUAU  | Cleavage    |
| tae77575p | LOC_Os12g13550.1  | 2.0 | 1 | 22 | 1325 | 1346 | AUAAAACCUUCAGCUAUCCAUC | GGUGGGUAGCAGAAGGUUUUUGU | Cleavage    |
| tae77575p | LOC_Os12g37740.1  | 2.5 | 1 | 22 | 1430 | 1451 | AUAAAACCUUCAGCUAUCCAUC | GAUGGAUUGCUGAAGGUUUUCAU | Cleavage    |
| tae77575p | CAJX010846126.1-1 | 2.5 | 1 | 22 | 1331 | 1352 | AUAAAACCUUCAGCUAUCCAUC | GAUGGGUAGCGGAGGGUUUUGU  | Cleavage    |
| tae77575p | LOC_Os06g05359.1  | 2.0 | 1 | 22 | 1340 | 1361 | AUAAAACCUUCAGCUAUCCAUC | GAUGGAUUGCAGAAGGUUUUUAU | Cleavage    |
| tae77575p | LOC_Os07g26430.1  | 2.0 | 1 | 21 | 2841 | 2861 | AUAAAACCUUCAGCUAUCCAUC | AUGGGUAGCUGAAGGUUUUUGU  | Cleavage    |
| tae77575p | CAJX010062037.1-1 | 2.5 | 1 | 21 | 1392 | 1412 | AUAAAACCUUCAGCUAUCCAUC | AUGGGUGGGUGAAGGUUUUUGU  | Cleavage    |
| tae77575p | 1979828           | 1.5 | 1 | 21 | 1128 | 1148 | AUAAAACCUUCAGCUAUCCAUC | GUGGAUAGCUGAAGGUUUUCAU  | Cleavage    |
| tae77575p | LOC_Os05g15040.1  | 1.5 | 1 | 21 | 1194 | 1214 | AUAAAACCUUCAGCUAUCCAUC | GUGGAUAGCUGAAGGUUUUCAU  | Cleavage    |
| tae77575p | LOC_Os11g37860.1  | 2.0 | 1 | 21 | 1332 | 1352 | AUAAAACCUUCAGCUAUCCAUC | GUGGAUAGCUGAAGGCUUUUGU  | Cleavage    |
| tae77575p | 1971330           | 2.0 | 1 | 22 | 1292 | 1313 | AUAAAACCUUCAGCUAUCCAUC | GGUGGAUAGCUGAAGAUUUUUGU | Cleavage    |
| tae77575p | 1971330           | 2.0 | 1 | 22 | 4052 | 4073 | AUAAAACCUUCAGCUAUCCAUC | GGUGGAUAGCUGAAGGAUUUUGU | Cleavage    |
| tae77575p | Bradi2g09434.1    | 1.5 | 1 | 21 | 2619 | 2639 | AUAAAACCUUCAGCUAUCCAUC | AUGGGUCGUGAAGGUUUUUAU   | Cleavage    |
| tae77575p | 1979822           | 1.5 | 1 | 21 | 1356 | 1376 | AUAAAACCUUCAGCUAUCCAUC | GUGGAUAGCUGAAGGUUUUCAU  | Cleavage    |
| tae77575p | LOC_Os12g31620.1  | 2.0 | 1 | 21 | 1368 | 1388 | AUAAAACCUUCAGCUAUCCAUC | GUGGAUAGCUGAAGGAUUUUGU  | Cleavage    |

|           |                   |     |   |    |      |      |                        |                          |          |
|-----------|-------------------|-----|---|----|------|------|------------------------|--------------------------|----------|
| tae77575p | Bradi2g37172.1    | 3.0 | 1 | 22 | 1199 | 1220 | AUAAAACCUUCAGCUAUCCAUC | GAUGGAUAGCAGAGGGAUUUUAU  | Cleavage |
| tae77575p | CAJX010074432.1-1 | 2.0 | 1 | 22 | 1364 | 1385 | AUAAAACCUUCAGCUAUCCAUC | GGUGGCUUGCUGAAGGUUUUUUAU | Cleavage |
| tae77575p | 1969287           | 3.0 | 1 | 22 | 1211 | 1232 | AUAAAACCUUCAGCUAUCCAUC | GAUGGAUAGCAGAAGGGUUUUGU  | Cleavage |
| tae77575p | CAJX010009340.1-2 | 2.5 | 1 | 21 | 1422 | 1442 | AUAAAACCUUCAGCUAUCCAUC | AUGGGUGGGUGAAGGUUUUUGU   | Cleavage |
| tae77575p | LOC_Os12g33160.1  | 1.5 | 1 | 22 | 1316 | 1337 | AUAAAACCUUCAGCUAUCCAUC | GUUGGUUAGCUGAGGGUUUUUAU  | Cleavage |
| tae77575p | CALP010002648.1-1 | 2.5 | 1 | 22 | 2019 | 2040 | AUAAAACCUUCAGCUAUCCAUC | GGUGGAUAGCGGAAGGGUUUUUAU | Cleavage |
| tae77575p | Bradi4g04662.1    | 2.5 | 1 | 22 | 1337 | 1358 | AUAAAACCUUCAGCUAUCCAUC | GGUGGAUUGCUGAAGGAUUUUUAU | Cleavage |
| tae77575p | CAJX011983953.1-1 | 2.5 | 1 | 21 | 1215 | 1235 | AUAAAACCUUCAGCUAUCCAUC | GUGGGUGGCUGAAGGUUUUCAU   | Cleavage |
| tae77575p | LOC_Os06g17900.1  | 3.0 | 1 | 22 | 1121 | 1142 | AUAAAACCUUCAGCUAUCCAUC | GAUGGAUAGCAGAAGGGUUUUGU  | Cleavage |
| tae77575p | LOC_Os11g13440.1  | 3.0 | 1 | 21 | 1362 | 1382 | AUAAAACCUUCAGCUAUCCAUC | AUGGAUAGCUGAAGGGUUUCAU   | Cleavage |
| tae77575p | 1969280           | 3.0 | 1 | 22 | 1214 | 1235 | AUAAAACCUUCAGCUAUCCAUC | GAUGGAUAGCAGAAGGGUUUUGU  | Cleavage |
| tae77575p | Bradi4g10017.1    | 1.5 | 1 | 20 | 925  | 944  | AUAAAACCUUCAGCUAUCCA   | UGGGUUGCUGAAGGUUUUUUAU   | Cleavage |
| tae77575p | LOC_Os06g17920.1  | 3.0 | 1 | 22 | 1100 | 1121 | AUAAAACCUUCAGCUAUCCAUC | GAUGGAUAGCAGAAGGGUUUUGU  | Cleavage |
| tae77575p | CAJX010841565.1-1 | 2.0 | 1 | 21 | 1323 | 1343 | AUAAAACCUUCAGCUAUCCAUC | AUGGGUAGCCGAGGGUUUUUAU   | Cleavage |
| tae77575p | LOC_Os12g28070.1  | 2.5 | 1 | 21 | 1338 | 1358 | AUAAAACCUUCAGCUAUCCAUC | AUGGAUAGCAGAAGGAUUUAU    | Cleavage |
| tae77575p | LOC_Os11g41540.1  | 2.5 | 1 | 21 | 1353 | 1373 | AUAAAACCUUCAGCUAUCCAUC | AUGGACAGCUGAAUGUUUUGU    | Cleavage |
| tae77575p | LOC_Os08g15880.1  | 1.5 | 1 | 20 | 1222 | 1241 | AUAAAACCUUCAGCUAUCCA   | UGGAUUGCUGAAGGUUUUUGU    | Cleavage |
| tae77575p | LOC_Os10g07574.1  | 1.5 | 1 | 21 | 1350 | 1370 | AUAAAACCUUCAGCUAUCCAUC | GUGGAUAGCUGAAGGUUUUGAU   | Cleavage |
| tae77575p | 1965627           | 2.5 | 1 | 21 | 1356 | 1376 | AUAAAACCUUCAGCUAUCCAUC | AUGGAUAGUCGAGGGUUUUGU    | Cleavage |
| tae77575p | LOC_Os11g13430.1  | 3.0 | 1 | 21 | 1365 | 1385 | AUAAAACCUUCAGCUAUCCAUC | AUGGAUAGCUGAAGGGUUUCAU   | Cleavage |
| tae77575p | CAJX010394563.1-1 | 3.0 | 1 | 22 | 1322 | 1343 | AUAAAACCUUCAGCUAUCCAUC | GAUGGAUUUCUGAGGGUUUUUGU  | Cleavage |
| tae77575p | LOC_Os11g37759.1  | 2.5 | 1 | 21 | 1344 | 1364 | AUAAAACCUUCAGCUAUCCAUC | GUGGGUAGCUGAAGGCUUUGU    | Cleavage |
| tae77575p | 1971174           | 2.5 | 1 | 21 | 1344 | 1364 | AUAAAACCUUCAGCUAUCCAUC | AUGGAUAGCCGAAGGAUUUAU    | Cleavage |
| tae77575p | 1971358           | 2.5 | 1 | 21 | 1353 | 1373 | AUAAAACCUUCAGCUAUCCAUC | GUGGGUAGCUGAAGGAUUUUGU   | Cleavage |
| tae77575p | LOC_Os11g45160.1  | 2.5 | 1 | 21 | 1332 | 1352 | AUAAAACCUUCAGCUAUCCAUC | GUGGAUCGCUGAAGGCUUUUAU   | Cleavage |
| tae77575p | LOC_Os11g44960.1  | 2.5 | 1 | 21 | 1335 | 1355 | AUAAAACCUUCAGCUAUCCAUC | GUGGGUGGCUGAAGGCUUUUAU   | Cleavage |
| tae77575p | Bradi2g38987.1    | 3.0 | 1 | 22 | 1283 | 1304 | AUAAAACCUUCAGCUAUCCAUC | GGUGGAUAGCAGAAGGCUUUGU   | Cleavage |
| tae77575p | Bradi2g60434.1    | 3.0 | 1 | 22 | 1355 | 1376 | AUAAAACCUUCAGCUAUCCAUC | GGUGGAUAGCAGAAGGCUUUGU   | Cleavage |
| tae77575p | Bradi4g01117.1    | 2.5 | 1 | 21 | 1530 | 1550 | AUAAAACCUUCAGCUAUCCAUC | AUGGAUAGCCGAAGGAUUUAU    | Cleavage |
| tae77575p | CAJX010859885.1-2 | 2.5 | 1 | 21 | 1965 | 1985 | AUAAAACCUUCAGCUAUCCAUC | GUGGAUAGCAGAAGGUUUUCAU   | Cleavage |
| tae77575p | CAJX010060256.1-1 | 2.0 | 1 | 20 | 1309 | 1328 | AUAAAACCUUCAGCUAUCCA   | UGGGUAGCUGAAGGUUUUCU     | Cleavage |
| tae77575p | LOC_Os09g11020.1  | 2.5 | 1 | 21 | 1695 | 1715 | AUAAAACCUUCAGCUAUCCAUC | GUGGGUGGCUGAAGGUUUUUU    | Cleavage |
| tae77575p | CALP010091747.1-1 | 2.5 | 1 | 21 | 1267 | 1287 | AUAAAACCUUCAGCUAUCCAUC | GUGGAUUGCUGAAGGAUUUAU    | Cleavage |
| tae77575p | LOC_Os11g46200.1  | 3.0 | 1 | 22 | 1661 | 1682 | AUAAAACCUUCAGCUAUCCAUC | GGUGGAUUGCUGAAGGAUUUUGU  | Cleavage |
| tae77575p | CAJX010851447.1-1 | 2.5 | 1 | 21 | 1101 | 1121 | AUAAAACCUUCAGCUAUCCAUC | AUGGAUAGCAGAAGGUUUUCAU   | Cleavage |
| tae77575p | 1969164           | 3.0 | 1 | 22 | 4133 | 4154 | AUAAAACCUUCAGCUAUCCAUC | GAUGGAUAGCAGAAGGGUUUUGU  | Cleavage |
| tae77575p | 1979157           | 1.5 | 1 | 21 | 5748 | 5768 | AUAAAACCUUCAGCUAUCCAUC | GUGGAUUGCUGAAGGUUUUUGU   | Cleavage |
| tae77575p | Bradi4g44603.1    | 2.5 | 1 | 21 | 1347 | 1367 | AUAAAACCUUCAGCUAUCCAUC | GUGGGUGGCGGAAGGUUUUUGU   | Cleavage |
| tae77575p | 1979517           | 3.0 | 1 | 21 | 1326 | 1346 | AUAAAACCUUCAGCUAUCCAUC | AUGGAUAGCCGAAGGAUUUUGU   | Cleavage |
| tae77575p | Bradi4g44550.2    | 2.5 | 1 | 21 | 1341 | 1361 | AUAAAACCUUCAGCUAUCCAUC | GUGGGUGGCGGAAGGUUUUUGU   | Cleavage |
| tae77575p | CAJX010387147.1-1 | 2.5 | 1 | 21 | 1335 | 1355 | AUAAAACCUUCAGCUAUCCAUC | AUGGAUUGGUGAAGGUUUUUGU   | Cleavage |
| tae77575p | Bradi4g44217.2    | 2.5 | 1 | 21 | 1350 | 1370 | AUAAAACCUUCAGCUAUCCAUC | GUGGGUGGCGGAAGGUUUUUGU   | Cleavage |
| tae77575p | Bradi4g44227.1    | 2.5 | 1 | 21 | 1350 | 1370 | AUAAAACCUUCAGCUAUCCAUC | GUGGGUGGCGGAAGGUUUUUGU   | Cleavage |
| tae77575p | Bradi4g44575.2    | 2.5 | 1 | 21 | 1341 | 1361 | AUAAAACCUUCAGCUAUCCAUC | GUGGGUGGCAGAAGGUUUUUGU   | Cleavage |
| tae77575p | LOC_Os11g37870.1  | 3.0 | 1 | 21 | 1332 | 1352 | AUAAAACCUUCAGCUAUCCAUC | AUGGAUAGCCGAAGGAUUUUGU   | Cleavage |
| tae77575p | LOC_Os02g18000.1  | 2.5 | 1 | 20 | 1438 | 1457 | AUAAAACCUUCAGCUAUCCA   | UGGGUAGCUGAAGGCUUUGU     | Cleavage |
| tae77575p | LOC_Os11g44970.1  | 2.5 | 1 | 21 | 1185 | 1205 | AUAAAACCUUCAGCUAUCCAUC | GUGGAUCGCUGAAGGCUUUUAU   | Cleavage |

|     |            |                   |     |   |    |      |      |                       |                         |             |
|-----|------------|-------------------|-----|---|----|------|------|-----------------------|-------------------------|-------------|
|     | tae77575p  | Bradi2g03060.1    | 3.0 | 1 | 21 | 1329 | 1349 | AUAAAACCUUCAGCUAUCCA  | AUGGAUUGCUGAAGGCUUUGU   | Cleavage    |
|     | tae77575p  | Bradi0014s00200.2 | 3.0 | 1 | 21 | 1329 | 1349 | AUAAAACCUUCAGCUAUCCA  | AUGGAUUGCUGAAGGCUUUGU   | Cleavage    |
|     | tae77575p  | Bradi4g10190.1    | 3.0 | 1 | 21 | 1332 | 1352 | AUAAAACCUUCAGCUAUCCA  | AUGGGUUGCUGAAGGAUUUUAU  | Cleavage    |
|     | tae77575p  | CAJX010847592.1-1 | 2.5 | 1 | 21 | 1392 | 1412 | AUAAAACCUUCAGCUAUCCA  | GUGGAUAGCCGAAGGUUUCAU   | Cleavage    |
|     | tae77575p  | LOC_Os08g07380.1  | 2.0 | 1 | 21 | 2916 | 2936 | AUAAAACCUUCAGCUAUCCA  | GUGGAUAGCAGAGGGUUUUGU   | Cleavage    |
|     | tae77575p  | CAJX010010925.1-2 | 3.0 | 1 | 22 | 1307 | 1328 | AUAAAACCUUCAGCUAUCCA  | GGUGGUUGCUGAAGGUUUUUGU  | Cleavage    |
|     | tae77575p  | CAJX010864692.1-1 | 2.5 | 1 | 21 | 1350 | 1370 | AUAAAACCUUCAGCUAUCCA  | GUGGGUUGCUGAAGGUUUUUAU  | Cleavage    |
|     | tae77575p  | LOC_Os08g42930.1  | 3.0 | 1 | 21 | 1131 | 1151 | AUAAAACCUUCAGCUAUCCA  | AUGGAUAGCAAAGGUUUUUAU   | Translation |
|     | tae77575p  | Bradi4g10050.1    | 2.5 | 1 | 20 | 1411 | 1430 | AUAAAACCUUCAGCUAUCCA  | UGGGUUGUUGAAGGUUUUUGU   | Cleavage    |
|     | tae77575p  | CAJX010839115.1-1 | 2.5 | 1 | 21 | 966  | 986  | AUAAAACCUUCAGCUAUCCA  | GUGGGUCGCCGAAGGUUUUUAU  | Cleavage    |
|     | tae77575p  | LOC_Os11g11990.1  | 3.0 | 1 | 21 | 1179 | 1199 | AUAAAACCUUCAGCUAUCCA  | GUGGAUAGCAGAAGGAUUUUGU  | Cleavage    |
|     | tae77575p  | LOC_Os07g08890.1  | 3.0 | 1 | 21 | 1371 | 1391 | AUAAAACCUUCAGCUAUCCA  | GUGGAUAGCCGAAGGAUUUUGU  | Cleavage    |
|     | tae77575p  | CAJX010075181.1-1 | 2.5 | 1 | 21 | 1350 | 1370 | AUAAAACCUUCAGCUAUCCA  | GUGGGUUGCUGAAGGUUUUUAU  | Cleavage    |
|     | tae77575p  | LOC_Os11g37740.1  | 3.0 | 1 | 21 | 1323 | 1343 | AUAAAACCUUCAGCUAUCCA  | GUGGGUAGCCGAAGGCUUUUAU  | Cleavage    |
|     | tae77575p  | LOC_Os11g37780.1  | 3.0 | 1 | 21 | 1329 | 1349 | AUAAAACCUUCAGCUAUCCA  | GUGGGUAGCAGAAGGAUUUUAU  | Cleavage    |
|     | tae77575p  | LOC_Os12g36720.1  | 2.5 | 1 | 22 | 1316 | 1337 | AUAAAACCUUCAGCUAUCCA  | GUUGGUUAGCAGAGGGUUUUUAU | Cleavage    |
|     | tae77575p  | LOC_Os11g37880.1  | 3.0 | 1 | 21 | 1329 | 1349 | AUAAAACCUUCAGCUAUCCA  | GUGGAUAGGUGAAGGCUUUGU   | Cleavage    |
|     | tae77575p  | LOC_Os11g37774.1  | 3.0 | 1 | 21 | 1422 | 1442 | AUAAAACCUUCAGCUAUCCA  | GUGGAUAGCCGAAGGCUUUGU   | Cleavage    |
|     | tae77575p  | CAJX010854275.1-1 | 3.0 | 1 | 21 | 1617 | 1637 | AUAAAACCUUCAGCUAUCCA  | GUGGGUAGCAGAAGGGUUUUAU  | Cleavage    |
|     | tae77575p  | CAJX011980239.1-1 | 3.0 | 1 | 21 | 1182 | 1202 | AUAAAACCUUCAGCUAUCCA  | GUUGAUGGCUAAGGAUUUUAU   | Cleavage    |
|     | tae77575p  | LOC_Os11g11770.1  | 2.5 | 1 | 21 | 1665 | 1685 | AUAAAACCUUCAGCUAUCCA  | GUGGAUUGCUGAAGGUUUUUGU  | Cleavage    |
|     | tae77575p  | LOC_Os11g45180.1  | 3.0 | 1 | 21 | 1332 | 1352 | AUAAAACCUUCAGCUAUCCA  | GUGGGUUGCUGAAGGCUUUUAU  | Cleavage    |
|     | tae77575p  | LOC_Os11g45050.1  | 3.0 | 1 | 21 | 1332 | 1352 | AUAAAACCUUCAGCUAUCCA  | GUGGGUUGCUGAAGGCUUUUAU  | Cleavage    |
|     | tae77575p  | LOC_Os11g43700.1  | 3.0 | 1 | 21 | 1542 | 1562 | AUAAAACCUUCAGCUAUCCA  | GUGGAUAGCCGAAGGUGUUGU   | Cleavage    |
|     | tae77575p  | LOC_Os12g36690.1  | 2.5 | 1 | 22 | 1316 | 1337 | AUAAAACCUUCAGCUAUCCA  | GUUGGUUAGCAGAGGGUUUUUAU | Cleavage    |
| 250 | tae96523p  | CALP010000242.1-1 | 3.0 | 1 | 20 | 5767 | 5786 | AAGCUUAAUGAGAACAUGUG  | UACAUGUUCUUAUUAGGUUA    | Cleavage    |
| 251 | tae9653b   | Bradi5g22842.1    | 2.0 | 1 | 20 | 4871 | 4890 | UGGCCAAGGUCUCUUGAGGC  | GCCUCAUGAGACCUUGGUUA    | Cleavage    |
| 252 | tae96553p  | CALP010001039.1-1 | 2.5 | 1 | 20 | 1145 | 1164 | CAAGGGAAGGAAGUAGCCAA  | UAGGCUACUCCUUUCCUUC     | Cleavage    |
|     | tae9657a3p | LOC_Os09g09490.1  | 2.5 | 1 | 20 | 1690 | 1709 | UGUGCUUCCUCGUCGAACGG  | UUGUUCGAUGAGGAAGUGCA    | Cleavage    |
| 253 | tae9657a3p | 1957195           | 3.0 | 1 | 21 | 4151 | 4171 | UGUGCUUCCUCGUCGAACGGU | GCUGCCC GGCGAGGAAGCACA  | Cleavage    |
|     | tae9657a3p | CAJX010068562.1-1 | 3.0 | 1 | 20 | 472  | 491  | UGUGCUUCCUCGUCGAACGG  | UUGUUUGUUGAGGAAGCACA    | Cleavage    |
| 254 | tae96605p  | CAJX010010377.1-2 | 3.0 | 1 | 20 | 736  | 755  | UUGCGAGCAACGGAUGAAUC  | GAUUCAUCUCGUCUGCUAA     | Translation |
| 255 | tae96615p  | LOC_Os03g37720.1  | 2.0 | 1 | 21 | 368  | 388  | UGAAGUAGAGCAGGGACCUCA | UCAGGUUCCUGCUCUGCUUCA   | Cleavage    |
| 256 | tae9662b3p | CALP010001887.1-1 | 3.0 | 1 | 21 | 3260 | 3280 | UGAACAUCCCAGAGCCACCGG | CUGGUGACUCUGGGGUGUUCC   | Cleavage    |
|     | tae96643p  | 1969593           | 1.0 | 1 | 21 | 4041 | 4061 | UUGCAGUCCUCGAUGUCGUAG | CUACGACAUCGAGGACUGCAU   | Cleavage    |
|     | tae96643p  | 1971449           | 1.0 | 1 | 21 | 231  | 251  | UUGCAGUCCUCGAUGUCGUAG | CUACGACAUCGAGGACUGCAU   | Cleavage    |
|     | tae96643p  | LOC_Os11g13410.1  | 1.0 | 1 | 21 | 243  | 263  | UUGCAGUCCUCGAUGUCGUAG | CUACGACAUCGAGGACUGCAU   | Cleavage    |
|     | tae96643p  | CAJX010843346.1-1 | 1.0 | 1 | 21 | 240  | 260  | UUGCAGUCCUCGAUGUCGUAG | CUACGACAUCGAGGACUGCAU   | Cleavage    |
|     | tae96643p  | LOC_Os12g13550.1  | 1.0 | 1 | 21 | 234  | 254  | UUGCAGUCCUCGAUGUCGUAG | CUACGACAUCGAGGACUGCAU   | Cleavage    |
|     | tae96643p  | LOC_Os12g28100.1  | 1.0 | 1 | 21 | 225  | 245  | UUGCAGUCCUCGAUGUCGUAG | CUACGACAUCGAGGACUGCAU   | Cleavage    |
|     | tae96643p  | LOC_Os10g04110.1  | 1.5 | 1 | 21 | 225  | 245  | UUGCAGUCCUCGAUGUCGUAG | CUAUGACAUCGAGGACUGCAU   | Cleavage    |
|     | tae96643p  | LOC_Os02g17304.1  | 1.5 | 1 | 21 | 234  | 254  | UUGCAGUCCUCGAUGUCGUAG | CUACGACAUCGAGGAUUGCAU   | Cleavage    |
|     | tae96643p  | LOC_Os11g15500.1  | 1.5 | 1 | 21 | 228  | 248  | UUGCAGUCCUCGAUGUCGUAG | CUACGACAUCGAGGAUUGCAU   | Cleavage    |
|     | tae96643p  | LOC_Os08g10440.1  | 1.5 | 1 | 21 | 243  | 263  | UUGCAGUCCUCGAUGUCGUAG | CUAUGACAUCGAGGACUGCAU   | Cleavage    |
|     | tae96643p  | CAJX010219539.1-1 | 1.5 | 1 | 21 | 96   | 116  | UUGCAGUCCUCGAUGUCGUAG | CUACGACAUCGAGGACUGCGU   | Cleavage    |
|     | tae96643p  | 1976664           | 3.0 | 1 | 21 | 231  | 251  | UUGCAGUCCUCGAUGUCGUAG | CUACGACGUCGAGGACUGCCU   | Cleavage    |
|     | tae96643p  | LOC_Os08g31780.1  | 1.5 | 1 | 21 | 228  | 248  | UUGCAGUCCUCGAUGUCGUAG | UUACGACAUUGAGGACUGCAU   | Cleavage    |



|     |           |                   |     |   |    |      |      |                       |                        |             |
|-----|-----------|-------------------|-----|---|----|------|------|-----------------------|------------------------|-------------|
|     | tae96643p | 1969821           | 2.0 | 1 | 21 | 234  | 254  | UUGCAGUCCUCGAUGUCGUAG | CUACGACAUUGAGGAUUGCAU  | Cleavage    |
|     | tae96643p | Bradi4g04662.1    | 1.5 | 1 | 21 | 219  | 239  | UUGCAGUCCUCGAUGUCGUAG | UUACGACAUUGAGGAUUGCAU  | Cleavage    |
|     | tae96643p | CAJX012041203.1-1 | 1.5 | 1 | 20 | 232  | 251  | UUGCAGUCCUCGAUGUCGUA  | UACGACAUUGAGGACUGCGU   | Cleavage    |
|     | tae96643p | LOC_Os11g27430.1  | 2.0 | 1 | 21 | 225  | 245  | UUGCAGUCCUCGAUGUCGUAG | CUACGACAUUGAGGACUGCAU  | Cleavage    |
|     | tae96643p | Bradi4g15067.1    | 2.0 | 1 | 21 | 225  | 245  | UUGCAGUCCUCGAUGUCGUAG | CUUCGACAUUGAGGACUGCAU  | Cleavage    |
|     | tae96643p | LOC_Os12g17490.1  | 2.5 | 1 | 21 | 231  | 251  | UUGCAGUCCUCGAUGUCGUAG | CUAUGAUUUGAGGAUUGCAU   | Cleavage    |
|     | tae96643p | CAJX011034949.1-1 | 1.5 | 1 | 21 | 228  | 248  | UUGCAGUCCUCGAUGUCGUAG | UUACGACAUUGAGGAUUGCAU  | Cleavage    |
|     | tae96643p | CALP010001083.1-1 | 2.5 | 1 | 21 | 24   | 44   | UUGCAGUCCUCGAUGUCGUAG | CUACGACAUUGAAGACUGCAU  | Translation |
|     | tae96643p | LOC_Os11g14380.1  | 2.0 | 1 | 20 | 229  | 248  | UUGCAGUCCUCGAUGUCGUA  | UACGACAUUGAGGAUUGCAU   | Cleavage    |
|     | tae96643p | 1970898           | 2.5 | 1 | 21 | 225  | 245  | UUGCAGUCCUCGAUGUCGUAG | CUACGACAUUGAAGACUGCGU  | Translation |
|     | tae96643p | LOC_Os12g37770.1  | 2.5 | 1 | 21 | 387  | 407  | UUGCAGUCCUCGAUGUCGUAG | UUAUGACAUUGAGGAUUGUAU  | Cleavage    |
| 257 | tae96643p | Bradi4g12877.1    | 3.0 | 1 | 21 | 252  | 272  | UUGCAGUCCUCGAUGUCGUAG | CUACGACAUUGAGGAUUGCGU  | Cleavage    |
|     | tae96643p | Bradi1g01377.1    | 3.0 | 1 | 21 | 225  | 245  | UUGCAGUCCUCGAUGUCGUAG | CUAUGAUUUGAGGAUUGCAU   | Cleavage    |
|     | tae96643p | Bradi2g39207.1    | 2.5 | 1 | 21 | 225  | 245  | UUGCAGUCCUCGAUGUCGUAG | CUACGACACCGAGGAUUGCAU  | Cleavage    |
|     | tae96643p | 1979517           | 3.0 | 1 | 21 | 219  | 239  | UUGCAGUCCUCGAUGUCGUAG | CUAUGAUUUGAGGAUUGCAU   | Cleavage    |
|     | tae96643p | LOC_Os02g19750.1  | 2.5 | 1 | 21 | 189  | 209  | UUGCAGUCCUCGAUGUCGUAG | CUACGACGCCGAGGACUGCAU  | Cleavage    |
|     | tae96643p | 1970912           | 3.0 | 1 | 21 | 207  | 227  | UUGCAGUCCUCGAUGUCGUAG | CUACGACAUUGAGGACUGUGU  | Cleavage    |
|     | tae96643p | LOC_Os11g45790.1  | 2.5 | 1 | 20 | 238  | 257  | UUGCAGUCCUCGAUGUCGUA  | CACGACAUUGAGGACUGCGU   | Cleavage    |
|     | tae96643p | 1957198           | 2.5 | 1 | 20 | 229  | 248  | UUGCAGUCCUCGAUGUCGUA  | CACGACAUUGAGGACUGCGU   | Cleavage    |
|     | tae96643p | LOC_Os12g37760.1  | 2.5 | 1 | 21 | 219  | 239  | UUGCAGUCCUCGAUGUCGUAG | UUAUGACAUUGAGGACUGUAU  | Cleavage    |
|     | tae96643p | Bradi2g09427.1    | 3.0 | 1 | 21 | 234  | 254  | UUGCAGUCCUCGAUGUCGUAG | CUACAGCAUCGAGGACUGCGU  | Cleavage    |
|     | tae96643p | 1978463           | 3.0 | 1 | 21 | 231  | 251  | UUGCAGUCCUCGAUGUCGUAG | CUAUGACAUUGAAGAUUGCAU  | Translation |
|     | tae96643p | Bradi1g01387.1    | 3.0 | 1 | 21 | 225  | 245  | UUGCAGUCCUCGAUGUCGUAG | UUAUGAUUUGAGGAUUGCAU   | Cleavage    |
|     | tae96643p | LOC_Os12g17090.1  | 3.0 | 1 | 21 | 231  | 251  | UUGCAGUCCUCGAUGUCGUAG | UUAUGAUUUGAGGAUUGCAU   | Cleavage    |
|     | tae96643p | Bradi2g09434.1    | 3.0 | 1 | 20 | 1480 | 1499 | UUGCAGUCCUCGAUGUCGUA  | UACGACGUCGAGGACUACAU   | Cleavage    |
|     | tae96643p | 1978730           | 3.0 | 1 | 21 | 231  | 251  | UUGCAGUCCUCGAUGUCGUAG | CUAUGAUUUGAAGACUGCAU   | Translation |
|     | tae96643p | CAJX010430930.1-1 | 2.5 | 1 | 21 | 216  | 236  | UUGCAGUCCUCGAUGUCGUAG | CUAUGAAAUCGAGGACUGCAU  | Cleavage    |
|     | tae96643p | CAJX010058681.1-1 | 2.5 | 1 | 20 | 229  | 248  | UUGCAGUCCUCGAUGUCGUA  | UACGACAUUGAAGACUGCGU   | Translation |
|     | tae96643p | 1977825           | 2.5 | 1 | 20 | 229  | 248  | UUGCAGUCCUCGAUGUCGUA  | UAUGACAUUGAAGACUGCAU   | Translation |
|     | tae96643p | 1971306           | 3.0 | 1 | 21 | 228  | 248  | UUGCAGUCCUCGAUGUCGUAG | CUACGACUUGCGAGGACUGCAU | Cleavage    |
|     | tae96643p | CAJX010844276.1-1 | 2.5 | 1 | 20 | 88   | 107  | UUGCAGUCCUCGAUGUCGUA  | UACGACAUUGAAGACUGCAU   | Translation |
|     | tae96643p | Bradi1g48747.1    | 3.0 | 1 | 20 | 247  | 266  | UUGCAGUCCUCGAUGUCGUA  | UACGAUGCCGAGGACUGCAU   | Cleavage    |
|     | tae96643p | CAJX010196371.1-1 | 3.0 | 1 | 21 | 228  | 248  | UUGCAGUCCUCGAUGUCGUAG | UUAUGACAUUGAGGACUUCAU  | Cleavage    |
|     | tae96643p | CAJX010077816.1-1 | 3.0 | 1 | 21 | 249  | 269  | UUGCAGUCCUCGAUGUCGUAG | CCAUGACAUUGAGGACUGCGU  | Cleavage    |
|     | tae96643p | CAJX010865995.1-1 | 3.0 | 1 | 20 | 235  | 254  | UUGCAGUCCUCGAUGUCGUA  | UCCACAUUGAGGACUGCAU    | Cleavage    |
|     | tae96643p | CALP010105515.1-1 | 3.0 | 1 | 20 | 58   | 77   | UUGCAGUCCUCGAUGUCGUA  | UACGACAUUGAAGACUGCGU   | Translation |
| 258 | tae96675p | CALP010000064.1-2 | 2.5 | 1 | 20 | 1362 | 1381 | AAAUUUGGCAAACAUAUUAU  | AUUCAUUGUUUCCAUAUUU    | Translation |
| 259 | tae96685p | LOC_Os08g29854.1  | 2.5 | 1 | 21 | 2247 | 2267 | CCAAUGACAAGUUAUUUCGGA | UCUCAAAAACUUGCAUUUGG   | Cleavage    |
| 260 | tae9773   | CALP010000577.1-1 | 2.5 | 1 | 21 | 965  | 985  | UUUGUUUUUAUGUUAUUUUGU | ACAAAAUAGUAUUGAAUAAA   | Cleavage    |
| 261 | tae9774   | CALP010013947.1-1 | 2.5 | 1 | 20 | 710  | 729  | CAAGAUUUUGGGUUAUUUCUG | CAGACAUUGACCAUAUCUUG   | Cleavage    |
| 262 | tae9775   | LOC_Os08g42670.1  | 3.0 | 1 | 21 | 934  | 954  | UGUGCGCAAUAAGAUUUUGCU | AGCCGAAUCAUUAUUGGCACA  | Cleavage    |
|     | tae9778   | Bradi2g38827.1    | 1.0 | 1 | 20 | 127  | 146  | UGCAUCAUCUGAACUCGUC   | GACGAGCUCGAGAUGAUGCA   | Cleavage    |
|     | tae9778   | CAJX010066569.1-1 | 2.0 | 1 | 20 | 127  | 146  | UGCAUCAUCUGAACUCGUC   | CUCGAGUUCGAGAUGAUGCA   | Cleavage    |
|     | tae9778   | LOC_Os12g09710.1  | 2.5 | 1 | 21 | 126  | 146  | UGCAUCAUCUGAACUCGUCG  | CAACGAGCUUGAGAUGAUGCA  | Cleavage    |
| 263 | tae9778   | LOC_Os08g42710.1  | 2.5 | 1 | 20 | 127  | 146  | UGCAUCAUCUGAACUCGUC   | GACGAGCUUGAGAUGAUGCU   | Cleavage    |
|     | tae9778   | CAJX010853954.1-1 | 2.5 | 1 | 20 | 127  | 146  | UGCAUCAUCUGAACUCGUC   | GGCGAGCUGGAGAUGAUGCA   | Cleavage    |
|     | tae9778   | CAJX010842884.1-1 | 2.5 | 1 | 20 | 127  | 146  | UGCAUCAUCUGAACUCGUC   | GGAGAAUUCGAGAUGAUGCA   | Cleavage    |

|     |         |                   |     |   |    |      |      |                       |                       |          |
|-----|---------|-------------------|-----|---|----|------|------|-----------------------|-----------------------|----------|
|     | tae9778 | CAJX010840686.1-2 | 3.0 | 1 | 21 | 126  | 146  | UGCAUCAUCUCGAACUCGUCG | CAACGAGCUGGAGAUGAUGCA | Cleavage |
|     | tae9778 | Bradi4g17365.1    | 3.0 | 1 | 21 | 126  | 146  | UGCAUCAUCUCGAACUCGUCG | CAACGAGCUGGAGAUGAUGCA | Cleavage |
| 264 | tae9781 | LOC_Os05g15040.1  | 3.0 | 1 | 20 | 1577 | 1596 | UUUUGUCACAUAAUACA     | GUGUAUUAGAUGUGAUAAAC  | Cleavage |
| 265 | tae9782 | LOC_Os07g33690.1  | 3.0 | 1 | 20 | 2640 | 2659 | GUUUUAGGUUGGUCAAUUG   | CAUUUUGAUCAAUCUAAGGC  | Cleavage |
